# Supplementary material for: Exosome-Derived Mediators as Potential Biomarkers for Cardiovascular Diseases: A Network Approach
Source: Proteomes. 2021 Feb 1;9(1):8. doi: 10.3390/proteomes9010008 (PMC7930981; doi:10.3390/proteomes9010008)
Supplement: Supplementary file 1 [file proteomes-09-00008-s001.xlsx]

## Sheet: Studies
Table S1 - Selection of the studies according to the three levels of exclusion criteria.
Selected/excluded	Autors	Journal	Year	PMID	Title
Selected	Escate, R., Padró, T., et al.	Cardiovasc Res	2020	32061123	High miR-133a levels in the circulation anticipates presentation of clinical events in familial hypercholesterolemia patients
Selected	Wang, Y., Jin, P., et al.	Clin Sci (Lond)	2019	31434696	Exosomal microRNA-122 mediates obesity-related cardiomyopathy through suppressing mitochondrial ADP-ribosylation factor-like 2
Selected	Kim, H., Bae, Y.U., et al.	J Transl Med	2019	31331349	The circulating exosomal microRNAs related to albuminuria in patients with diabetic nephropathy
Selected	Cheng, M., Yang, J., et al.	Nat Commun	2019	30814518	Circulating myocardial microRNAs from infarcted hearts are carried in exosomes and mobilise bone marrow progenitor cells.
Selected	Liu, X., Yuan, W., et al.	J Cardiovasc Transl Res	2019	29557993	miRNA Profiling of Exosomes from Spontaneous Hypertensive Rats Using Next-Generation Sequencing.
Selected	Wu, T., Chen, Y., et al.	J Thorac Dis	2018	30622793	Circulating exosomal miR-92b-5p is a promising diagnostic biomarker of heart failure with reduced ejection fraction patients hospitalized for acute heart failure.
Selected	Sharma, M., Ravichandran, R., et al.	Hum Immunol	2018	29908844	Tissue-associated self-antigens containing exosomes: Role in allograft rejection.
Selected	Bhattacharjee, R., Khalyfa, A., et al.	J Clin Sleep Med	2018	29734990	Exosomal Cargo Properties, Endothelial Function and Treatment of Obesity Hypoventilation Syndrome: A Proof of Concept Study.
Selected	Wu, T., Chen, Y., et al.	Cell Physiol Biochem	2018	29719295	Serum Exosomal MiR-92b-5p as a Potential Biomarker for Acute Heart Failure Caused by Dilated Cardiomyopathy.												30814518
Selected	Minghua, W., Zhijian, G., et al.	Cell Death Dis	2018	29476052	Plasma exosomes induced by remote ischaemic preconditioning attenuate myocardial ischaemia/reperfusion injury by transferring miR-24.												29908844
Selected	Beg, F., Wang, R., et al.	BMC Res Notes	2017	29258606	Inflammation-associated microRNA changes in circulating exosomes of heart failure patients.												29734990
Selected	Li, J., Tan, M., et al.	Thromb Res	2017	28460288	Thrombin-activated platelet-derived exosomes regulate endothelial cell expression of ICAM-1 via microRNA-223 during the thrombosis-inflammation response.												29719295
Selected	Zhao, L., Luo, H., et al.	Cardiology	2017	28068653	Exosomes Derived from Human Pulmonary Artery Endothelial Cells Shift the Balance between Proliferation and Apoptosis of Smooth Muscle Cells.												29557993
Selected	Osada-Oka, M., Shiota, M., et al.	Hypertens Res	2017	27881852	Macrophage-derived exosomes induce inflammatory factors in endothelial cells under hypertensive conditions.												29476052
Selected	Khalyfa, A., Kheirandish-Gozal, L., et al.	Am J Respir Crit Care Med	2016	27163713	Circulating Plasma Extracellular Microvesicle MicroRNA Cargo and Endothelial Dysfunction in Children with Obstructive Sleep Apnea.												29258606
Selected	Niu, C., Wang, X., et al.	J Am Heart Assoc	2016	27792649	Macrophage Foam Cell-Derived Extracellular Vesicles Promote Vascular Smooth Muscle Cell Migration and Adhesion.												28460288
Selected	Khalyfa, A., Zhang, C., et al.	Sleep	2016	27634792	Effect on Intermittent Hypoxia on Plasma Exosomal Micro RNA Signature and Endothelial Function in Healthy Adults.												28068653
Selected	Tan, M., Yan, H.B., et al.	Cell Physiol Biochem	2016	27198239	Thrombin Stimulated Platelet-Derived Exosomes Inhibit Platelet-Derived Growth Factor Receptor-Beta Expression in Vascular Smooth Muscle Cells.												27163713
Selected	Emanueli, C., Shearn, A.I., et al.	PLoS One	2016	27128471	Coronary Artery-Bypass-Graft Surgery Increases the Plasma Concentration of Exosomes Carrying a Cargo of Cardiac MicroRNAs: An Example of Exosome Trafficking Out of the Human Heart with Potential for Cardiac Biomarker Discovery.												27792649
Selected	Zhang, L., Wang, W., et al.	Rev Port Cardiol	2016	27118092	Proteomic analysis associated with coronary artery dilatation caused by Kawasaki disease using serum exosomes.												27634792
Selected	Aliotta, J.M., Pereira, M., et al.	Cardiovasc Res	2016	26980205	Exosomes induce and reverse monocrotaline-induced pulmonary hypertension in mice.												27530098
Selected	Ivy, J.R., Oosthuyzen, W., et al.	Hypertension	2016	26953322	Glucocorticoids Induce Nondipping Blood Pressure by Activating the Thiazide-Sensitive Cotransporter.												27198239
Selected	Yanh, Y., Li, Y., et al.	J Mol Med (Berl)	2016	26857375	Exosomal transfer of miR-30a between cardiomyocytes regulates autophagy after hypoxia.												27128471
Selected	Foglio, E., Puddighinu, G., et al.	Int J Cardiol	2015	26159041	Exosomal clusterin, identified in the pericardial fluid, improves myocardial performance following MI through epicardial activation, enhanced arteriogenesis and reduced apoptosis.												27118092
Selected	Kuosmanen, S.M., Hartikainen, J., et al.	PLoS One	2015	25763857	MicroRNA profiling of pericardial fluid samples from patients with heart failure.												26980205
Selected	Yamaguchi, T., Izumi, Y., et al.	Int J Cardiol	2015	25464262	Repeated remote ischemic conditioning attenuates left ventricular remodeling via exosome-mediated intercellular communication on chronic heart failure after myocardial infarction.												26953322
Selected	Damkjaer, M., Jensen, P.H., et al.	Acta Physiol (Oxf)	2014	25041901	Selective renal vasoconstriction, exaggerated natriuresis and excretion rates of exosomic proteins in essential hypertension.												26857375
Selected	Santovito, D., De Nardis, V., et al.	J Clin Endocrinol Metab	2014	24937531	Plasma exosome microRNA profiling unravels a new potential modulator of adiponectin pathway in diabetes: effect of glycemic control.												26159041
Selected	Kranendonk, M.E., de Kleijn, D.P., et al.	Cardiovasc Diabetol	2014	24498934	Extracellular vesicle markers in relation to obesity and metabolic complications in patients with manifest cardiovascular disease.												25763857
Selected	Matsumoto, S., Sakata, Y., et al.	Circ Res	2013	23743335	Circulating p53-responsive microRNAs are predictive indicators of heart failure after acute myocardial infarction.												25464262
Selected	Cubedo, J., Padró, T., et al.	J Proteome Res	2011	21043527	Proteomic signature of Apolipoprotein J in the early phase of new-onset myocardial infarction.												25041901
Excluded - Cell manipulation	Yan, B., Zhang, Y., et al.	Theranostics	2020	32550900	Stem cell-derived exosomes prevent pyroptosis and repair ischemic muscle injury through a novel exosome/circHIPK3/ FOXO3a pathway
Excluded - Cell manipulation	Wang, L., Zhang, J.	Int J Nanomedicine	2020	32494135	Exosomal lncRNA AK139128 Derived from Hypoxic Cardiomyocytes Promotes Apoptosis and Inhibits Cell Proliferation in Cardiac Fibroblasts
Excluded - Cell manipulation	Gu X, Li Y, Chen K, Wang X, Wang Z, Lian H, Lin Y, Rong X, Chu M, Lin J, Guo X.	J Cell Mol Med	2020	32424968	Exosomes derived from umbilical cord mesenchymal stem cells alleviate viral myocarditis through activating AMPK/mTOR-mediated autophagy flux pathway
Excluded - Cell manipulation	Chen YL, Sheu JJ, Sun CK, Huang TH, Lin YP, Yip HK.	Mol Med	2020	32410577	MicroRNA-214 modulates the senescence of vascular smooth muscle cells in carotid artery stenosis
Excluded - Cell manipulation	Geng, T., Song, Z.Y., et al.	Int J Nanomedicine	2020	32368046	Exosome Derived from Coronary Serum of Patients with Myocardial Infarction Promotes Angiogenesis Through the miRNA-143/IGF-IR Pathway
Excluded - Cell manipulation	Cai, L., Chao, G., et al.	Aging (Albany NY)	2020	32327611	Activated CD4(+) T cells-derived exosomal miR-142-3p boosts post-ischemic ventricular remodeling by activating myofibroblast
Excluded - Cell manipulation	Zhu, D., Johnson, T.K., et al.	Stem Cell Res Ther	2020	32321589	Macrophage M2 polarization induced by exosomes from adipose-derived stem cells contributes to the exosomal proangiogenic effect on mouse ischemic hindlimb
Excluded - Cell manipulation	Wang, S., Zhan, J., et al.	Cell Biochem Funct	2020	32307741	CircRNA-0077930 from hyperglycaemia-stimulated vascular endothelial cell exosomes regulates senescence in vascular smooth muscle cells
Excluded - Cell manipulation	Qu, Q., Pang, Y., et al.	Stem Cell Res Ther	2020	32293542	Exosomes derived from human umbilical cord mesenchymal stem cells inhibit vein graft intimal hyperplasia and accelerate reendothelialization by enhancing endothelial function
Excluded - Cell manipulation	Hassanpour, M., Rezaie, J., et al.	Stem Cell Res Ther	2020	32216836	Autophagy modulation altered differentiation capacity of CD146(+) cells toward endothelial cells, pericytes, and cardiomyocytes
Excluded - Cell manipulation	Xia, X., Zhang, L., et al.	J Am Heart Assoc	2020	32174233	Helicobacter pylori Infection Impairs Endothelial Function Through an Exosome-Mediated Mechanism
Excluded - Cell manipulation	Takov, K., He, Z., et al.	Basic Res Cardiol	2020	32146560	Small extracellular vesicles secreted from human amniotic fluid mesenchymal stromal cells possess cardioprotective and promigratory potential
Excluded - Cell manipulation	Sindi, H.A., Russomanno, G., et al.	Nat Commun	2020	32132543	Therapeutic potential of KLF2-induced exosomal microRNAs in pulmonary hypertension
Excluded - Cell manipulation	Santoso, M.R., Ikeda, G., et al.	J Am Heart Assoc	2020	32131688	Exosomes From Induced Pluripotent Stem Cell-Derived Cardiomyocytes Promote Autophagy for Myocardial Repair
Excluded - Cell manipulation	Lin, Y., Zhang, C., et al.	J Extracell Vesicles	2020	32128072	Exosomes derived from HeLa cells break down vascular integrity by triggering endoplasmic reticulum stress in endothelial cells
Excluded - Cell manipulation	Liu, S., Chen, J., et al.	Basic Res Cardiol	2020	32112145	M1-like macrophage-derived exosomes suppress angiogenesis and exacerbate cardiac dysfunction in a myocardial infarction microenvironment
Excluded - Cell manipulation	Riquelme, J.A., Takov, K., et al.	J Cell Mol Med	2020	32101370	Increased production of functional small extracellular vesicles in senescent endothelial cells
Excluded - Cell manipulation	Dai, Y., Wang, S., et al.	J Mol Cell Cardiol	2020	32087217	M2 macrophage-derived exosomes carry microRNA-148a to alleviate myocardial ischemia/reperfusion injury via inhibiting TXNIP and the TLR4/NF-ÎºB/NLRP3 inflammasome signaling pathway
Excluded - Cell manipulation	Hou, Y.C., Li, J.A., et al.	Colloids Surf B Biointerfaces	2020	32058252	Tailoring of cardiovascular stent material surface by immobilizing exosomes for better pro-endothelialization function
Excluded - Cell manipulation	Wang, J., Chen, S., et al.	Oxid Med Cell Longev	2020	32051731	Exosome-Mediated Transfer of ACE2 (Angiotensin-Converting Enzyme 2) from Endothelial Progenitor Cells Promotes Survival and Function of Endothelial Cell
Excluded - Cell manipulation	Casieri, V,, Matteucci, M., et al.	Sci Rep	2020	32051439	Ticagrelor Enhances Release of Anti-Hypoxic Cardiac Progenitor Cell-Derived Exosomes Through Increasing Cell Proliferation In Vitro
Excluded - Cell manipulation	Yoon, Y.M., Lee, J.H., et al.	J Pineal Res	2020	31989677	Melatonin-stimulated exosomes enhance the regenerative potential of chronic kidney disease-derived mesenchymal stem/stromal cells via cellular prion proteins
Excluded - Cell manipulation	Robino, J.J., Pamir, N., et al.	Bone	2020	31972314	Spatial and biochemical interactions between bone marrow adipose tissue and hematopoietic stem and progenitor cells in rhesus macaques
Excluded - Cell manipulation	Liu, X., Li, X., et al.	J Cell Physiol	2020	31960418	Exosomes from mesenchymal stem cells overexpressing MIF enhance myocardial repair
Excluded - Cell manipulation	Xu, F., Zhong, J.Y., et al.	J Pineal Res	2020	31943334	Melatonin alleviates vascular calcification and ageing through exosomal miR-204/miR-211 cluster in a paracrine manner
Excluded - Cell manipulation	Huang, L., Yang, L., et al.	Cell Cycle	2020	31924121	Human umbilical cord mesenchymal stem cells-derived exosomes transfers microRNA-19a to protect cardiomyocytes from acute myocardial infarction by targeting SOX6
Excluded - Cell manipulation	Marinaro, F., Gómez-Serrano, M., et al.	Front Bioeng Biotechnol	2020	31921832	Unraveling the Molecular Signature of Extracellular Vesicles From Endometrial-Derived Mesenchymal Stem Cells: Potential Modulatory Effects and Therapeutic Applications
Excluded - Cell manipulation	Govindappa, P.K., Patil, M., et al.	FASEB J	2020	31907992	Targeting exosome-associated human antigen R attenuates fibrosis and inflammation in diabetic heart
Excluded - Cell manipulation	Morelli, M.B., Shu, J., et al.	Int J Mol Sci	2019	31892162	Cardiosomal microRNAs Are Essential in Post-Infarction Myofibroblast Phenoconversion
Excluded - Cell manipulation	Wang, Y., Zhao, R., et al.	Oxid Med Cell Longev	2019	31885817	Exosomal circHIPK3 Released from Hypoxia-Pretreated Cardiomyocytes Regulates Oxidative Damage in Cardiac Microvascular Endothelial Cells via the miR-29a/IGF-1 Pathway
Excluded - Cell manipulation	Angulski, A.B.B., Capriglione, L.G.A., et al.	Stem Cells Int	2019	31885610	Systemic Infusion of Expanded CD133(+) Cells and Expanded CD133(+) Cell-Derived EVs for the Treatment of Ischemic Cardiomyopathy in a Rat Model of AMI
Excluded - Cell manipulation	Lin, Y., Zhang, F., et al.	Cell Mol Biol (Noisy-le-grand)	2019	31880529	Mesenchymal stem cell-derived exosomes improve diabetes mellitus-induced myocardial injury and fibrosis via inhibition of TGF-Î²1/Smad2 signaling pathway
Excluded - Cell manipulation	Solache-Berrocal, G., Barral-Varela, A.M., et al.	J Clin Med	2019	31877754	Correlation of Micro-Computed Tomography Assessment of Valvular Mineralisation with Histopathological and Immunohistochemical Features of Calcific Aortic Valve Disease
Excluded - Cell manipulation	Wu, G., Zhang, J., et al.	Angew Chem Int Ed Engl	2020	31854064	Molecularly Engineered Macrophage-Derived Exosomes with Inflammation Tropism and Intrinsic Heme Biosynthesis for Atherosclerosis Treatment
Excluded - Cell manipulation	Ren, X.S., Tong, Y., et al.	J Extracell Vesicles	2019	31839907	MiR155-5p in adventitial fibroblasts-derived extracellular vesicles inhibits vascular smooth muscle cell proliferation via suppressing angiotensin-converting enzyme expression
Excluded - Cell manipulation	Khalyfa, A., Gozal, D., et al.	Int J Mol Sci	2019	31835632	Plasma Extracellular Vesicles in Children with OSA Disrupt Blood-Brain Barrier Integrity and Endothelial Cell Wound Healing in Vitro
Excluded - Cell manipulation	Lai, B., Wang, J., et al.	Front Immunol	2019	31824480	Twenty Novel Disease Group-Specific and 12 New Shared Macrophage Pathways in Eight Groups of 34 Diseases Including 24 Inflammatory Organ Diseases and 10 Types of Tumors
Excluded - Cell manipulation	Chen, L., Hu, L., et al.	Acta Biochim Biophys Sin (Shanghai)	2019	31768526	Exosome-encapsulated miR-505 from ox-LDL-treated vascular endothelial cells aggravates atherosclerosis by inducing NET formation
Excluded - Cell manipulation	Li, B., Zang, G., et al.	Biomed Pharmacother	2020	31766102	Activation of CD137 signaling promotes neointimal formation by attenuating TET2 and transferrring from endothelial cell-derived exosomes to vascular smooth muscle cells
Excluded - Cell manipulation	Li, N., Liu, S.F., et al.	Front Cell Infect Microbiol	2019	31750260	Exosome-Transmitted miR-25 Induced by H. pylori Promotes Vascular Endothelial Cell Injury by Targeting KLF2
Excluded - Cell manipulation	Xu, H., Wang, Z., et al.	J Cell Biochem	2020	31736169	Exosomes derived from adipose tissue, bone marrow, and umbilical cord blood for cardioprotection after myocardial infarction
Excluded - Cell manipulation	Pan, W., Liang, J., et al.	Int J Biochem Cell Biol	2020	31733402	Differentially expressed microRNA profiles in exosomes from vascular smooth muscle cells associated with coronary artery calcification
Excluded - Cell manipulation	Zhang, Y., Wang, Y., et al.	J Cell Mol Med	2020	31729180	Knockout of beta-2 microglobulin reduces stem cell-induced immune rejection and enhances ischaemic hindlimb repair via exosome/miR-24/Bim pathway
Excluded - Cell manipulation	Wu, J., Dong, T., et al.	Metabolism	2020	31715176	Hepatic exosome-derived miR-130a-3p attenuates glucose intolerance via suppressing PHLPP2 gene in adipocyte
Excluded - Cell manipulation	Yuan, X., Bhat, O.M., et al.	Biochim Biophys Acta Mol Cell Biol Lipids	2019	31647995	Endothelial acid ceramidase in exosome-mediated release of NLRP3 inflammasome products during hyperglycemia: Evidence from endothelium-specific deletion of Asah1 gene
Excluded - Cell manipulation	Zhong, X., Gao, W., et al.	Mol Med Rep	2019	31638185	Dendritic cell exosomeâ€‘shuttled miRNA146a regulates exosomeâ€‘induced endothelial cell inflammation by inhibiting IRAKâ€‘1: A feedback control mechanism
Excluded - Cell manipulation	Chen, S.J., Tsui, P.F., et al.	Int J Mol Sci	2019	31635197	Carvedilol Ameliorates Experimental Atherosclerosis by Regulating Cholesterol Efflux and Exosome Functions
Excluded - Cell manipulation	Chai, H.T., Sheu, J.J., et al.	Am J Transl Res	2019	31632517	Early administration of cold water and adipose derived mesenchymal stem cell derived exosome effectively protects the heart from ischemia-reperfusion injury
Excluded - Cell manipulation	Huang, P., Wang, L., et al.	Stem Cell Res Ther	2019	31601262	Combinatorial treatment of acute myocardial infarction using stem cells and their derived exosomes resulted in improved heart performance
Excluded - Cell manipulation	Singla, D.K., Johnson, T.A., et al.	Cells	2019	31600901	Exosome Treatment Enhances Anti-Inflammatory M2 Macrophages and Reduces Inflammation-Induced Pyroptosis in Doxorubicin-Induced Cardiomyopathy
Excluded - Cell manipulation	Liu, L., Zhang, H., et al.	Artif Cells Nanomed Biotechnol	2019	31591913	Exosomal miR-320d derived from adipose tissue-derived MSCs inhibits apoptosis in cardiomyocytes with atrial fibrillation (AF)
Excluded - Cell manipulation	Zhang, W., Dong, X., et al.	Exp Eye Res	2019	31560926	Exosomes derived from platelet-rich plasma mediate hyperglycemia-induced retinal endothelial injury via targeting the TLR4 signaling pathway
Excluded - Cell manipulation	Xu, R., Zhang, F., et al.	J Cell Mol Med	2019	31557396	Exosomes derived from pro-inflammatory bone marrow-derived mesenchymal stem cells reduce inflammation and myocardial injury via mediating macrophage polarization
Excluded - Cell manipulation	Khalyfa, A., Marin, J.M., et al.	Sleep	2020	31552414	Plasma exosomes in OSA patients promote endothelial senescence: effect of long-term adherent continuous positive airway pressure
Excluded - Cell manipulation	Sun, X., Jung, J.H., et al.	Front Cell Neurosci	2019	31551712	Stem Cell-Derived Exosomes Protect Astrocyte Cultures From in vitro Ischemia and Decrease Injury as Post-stroke Intravenous Therapy
Excluded - Cell manipulation	Bell, C.R., Jones, L.B., et al.	Biology (Basel)	2019	31547509	The Role of Lipopolysaccharide-Induced Extracellular Vesicles in Cardiac Cell Death
Excluded - Cell manipulation	Xu, Y.Q., Xu, Y., et al.	Eur Rev Med Pharmacol Sci	2019	31486507	Effect of exosome-carried miR-30a on myocardial apoptosis in myocardial ischemia-reperfusion injury rats through regulating autophagy
Excluded - Cell manipulation	Wang, Y., Jia, L., et al.	Atherosclerosis	2019	31479773	Involvement of macrophage-derived exosomes in abdominal aortic aneurysms development
Excluded - Cell manipulation	Li, X., Ballantyne, L.L., et al.	FASEB J	2019	31469602	Perivascular adipose tissue-derived extracellular vesicle miR-221-3p mediates vascular remodeling
Excluded - Cell manipulation	Singla, R., Garner, K.H., et al.	Mol Cell Biochem	2019	31468244	Exosomes derived from cardiac parasympathetic ganglionic neurons inhibit apoptosis in hyperglycemic cardiomyoblasts
Excluded - Cell manipulation	Ibrahim, A.G.E., Li, C., et al.	Nat Biomed Eng	2019	31451800	Augmenting canonical Wnt signalling in therapeutically inert cells converts them into therapeutically potent exosome factories
Excluded - Cell manipulation	Lin, F., Zeng, Z., et al.	Stem Cell Res Ther	2019	31443679	YBX-1 mediated sorting of miR-133 into hypoxia/reoxygenation-induced EPC-derived exosomes to increase fibroblast angiogenesis and MEndoT
Excluded - Cell manipulation	Chen, C.H., Hsu, S.Y., et al.	Cells	2019	31430983	MicroRNA-21 Mediates the Protective Effect of Cardiomyocyte-Derived Conditioned Medium on Ameliorating Myocardial Infarction in Rats
Excluded - Cell manipulation	Johnson, T.K., Zhao, L., et al.	Am J Physiol Heart Circ Physiol	2019	31418583	Exosomes derived from induced vascular progenitor cells promote angiogenesis in vitro and in an in vivo rat hindlimb ischemia model
Excluded - Cell manipulation	Gollmann-Tepeköylü, C., Pölzl, L., et al.	Cardiovasc Res	2020	31410448	miR-19a-3p containing exosomes improve function of ischaemic myocardium upon shock wave therapy
Excluded - Cell manipulation	Gao, H., Wang, X., et al.	Biol Chem	2020	31318684	Exosomal MALAT1 derived from ox-LDL-treated endothelial cells induce neutrophil extracellular traps to aggravate atherosclerosis
Excluded - Cell manipulation	Shao, L., Zhang, Y., et al.	Cell Mol Life Sci	2020	31312880	Knockout of beta-2 microglobulin enhances cardiac repair by modulating exosome imprinting and inhibiting stem cell-induced immune rejection
Excluded - Cell manipulation	Li, H., Zhu, X., et al.	Cell Cycle	2019	31305205	Loss of exosomal MALAT1 from ox-LDL-treated vascular endothelial cells induces maturation of dendritic cells in atherosclerosis development
Excluded - Cell manipulation	Deng, S., Zhou, X., et al.	Int J Biochem Cell Biol	2019	31276786	Exosomes from adipose-derived mesenchymal stem cells ameliorate cardiac damage after myocardial infarction by activating S1P/SK1/S1PR1 signaling and promoting macrophage M2 polarization
Excluded - Cell manipulation	Lin, X., Li, S., et al.	Life Sci	2019	31220525	Exosomal Notch3 from high glucose-stimulated endothelial cells regulates vascular smooth muscle cells calcification/aging
Excluded - Cell manipulation	Eguchi, S., Takefuji, M., et al.	J Biol Chem	2019	31217281	Cardiomyocytes capture stem cell-derived, anti-apoptotic microRNA-214 via clathrin-mediated endocytosis in acute myocardial infarction
Excluded - Cell manipulation	Yu, D.W., Ge, P.P., et al.	Eur Rev Med Pharmacol Sci	2019	31210321	HSP20-mediated cardiomyocyte exosomes improve cardiac function in mice with myocardial infarction by activating Akt signaling pathway
Excluded - Cell manipulation	Ghoshal, P., Singla, B., et al.	Redox Biol	2019	31201114	Loss of GTPase activating protein neurofibromin stimulates paracrine cell communication via macropinocytosis
Excluded - Cell manipulation	Tavakoli Dargani, Z., Singla, D.K.	Am J Physiol Heart Circ Physiol	2019	31172809	Embryonic stem cell-derived exosomes inhibit doxorubicin-induced TLR4-NLRP3-mediated cell death-pyroptosis
Excluded - Cell manipulation	Kuo, H.F., Hsieh, C.C., et al.	J Clin Med	2019	31167519	Simvastatin Attenuates Cardiac Fibrosis via Regulation of Cardiomyocyte-Derived Exosome Secretion
Excluded - Cell manipulation	Wang, Z., Zhu, H., et al.	Cell Death Dis	2019	31142732	Exosomes derived from M1 macrophages aggravate neointimal hyperplasia following carotid artery injuries in mice through miR-222/CDKN1B/CDKN1C pathway
Excluded - Cell manipulation	Beez, C.M., Haag, M., et al.	J Nanobiotechnology	2019	31133024	Extracellular vesicles from regenerative human cardiac cells act as potent immune modulators by priming monocytes
Excluded - Cell manipulation	Huang, P., Wang, L., et al.	Cardiovasc Res	2020	31119268	Atorvastatin enhances the therapeutic efficacy of mesenchymal stem cells-derived exosomes in acute myocardial infarction via up-regulating long non-coding RNA H19
Excluded - Cell manipulation	Zhang, C., Wang, P., et al.	Biomed Res Int	2019	31119161	Function of Adipose-Derived Mesenchymal Stem Cells in Monocrotaline-Induced Pulmonary Arterial Hypertension through miR-191 via Regulation of BMPR2
Excluded - Cell manipulation	Saha, P., Sharma, S., et al.	Sci Transl Med	2019	31118291	Circulating exosomes derived from transplanted progenitor cells aid the functional recovery of ischemic myocardium
Excluded - Cell manipulation	Yang, J., Yu, X.F., et al.	Eur Rev Med Pharmacol Sci	2019	31115028	Decreased HSP70 expression on serum exosomes contributes to cardiac fibrosis during senescence
Excluded - Cell manipulation	Milano, G., Biemmi, V., et al.	Cardiovasc Res	2020	31098627	Intravenous administration of cardiac progenitor cell-derived exosomes protects against doxorubicin/trastuzumab-induced cardiac toxicity
Excluded - Cell manipulation	Han, C. , Zhou, J., et al.	Biomater Sci	2019	31090763	Human umbilical cord mesenchymal stem cell derived exosomes encapsulated in functional peptide hydrogels promote cardiac repair
Excluded - Cell manipulation	Zhu, B., Zhang, L., et al.	Oxid Med Cell Longev	2019	31089420	Stem Cell-Derived Exosomes Prevent Aging-Induced Cardiac Dysfunction through a Novel Exosome/lncRNA MALAT1/NF-ÎºB/TNF-Î± Signaling Pathway
Excluded - Cell manipulation	Wang, B., Zhang, A., et al.	Theranostics	2019	31037144	miR-26a Limits Muscle Wasting and Cardiac Fibrosis through Exosome-Mediated microRNA Transfer in Chronic Kidney Disease
Excluded - Cell manipulation	Su, X., Shen, Y., et al.	J Vis Exp	2019	31033952	Purification and Transplantation of Myogenic Progenitor Cell Derived Exosomes to Improve Cardiac Function in Duchenne Muscular Dystrophic Mice
Excluded - Cell manipulation	Qiao, L., Hu, S., et al.	J Clin Invest	2019	31033484	microRNA-21-5p dysregulation in exosomes derived from heart failure patients impairs regenerative potential
Excluded - Cell manipulation	Liu, H., Sun, X., et al.	J Cell Biochem	2019	30989714	Human umbilical cord mesenchymal stem cells derived exosomes exert antiapoptosis effect via activating PI3K/Akt/mTOR pathway on H9C2 cells
Excluded - Cell manipulation	Harper, R.L., Maiolo, S., et al.	Respirology	2019	30977250	BMPR2-expressing bone marrow-derived endothelial-like progenitor cells alleviate pulmonary arterial hypertension in vivo
Excluded - Cell manipulation	Song, H.Y., Chien, C.S., et al.	Cells	2019	30965672	Generation of GLA-Knockout Human Embryonic Stem Cell Lines to Model Autophagic Dysfunction and Exosome Secretion in Fabry Disease-Associated Hypertrophic Cardiomyopathy
Excluded - Cell manipulation	Kang, J.Y., Park, H., et al.	Int J Mol Med	2019	30942393	Human peripheral bloodâ€‘derived exosomes for microRNA delivery
Excluded - Cell manipulation	Hocine, H.R., Brunel, S., et al.	Stem Cells Transl Med	2019	30924311	Extracellular Vesicles Released by Allogeneic Human Cardiac Stem/Progenitor Cells as Part of Their Therapeutic Benefit
Excluded - Cell manipulation	Liu, C., Ge, H.M., et al.	Proc Natl Acad Sci U S A	2019	30914462	Targeting pericyte-endothelial cell crosstalk by circular RNA-cPWWP2A inhibition aggravates diabetes-induced microvascular dysfunction
Excluded - Cell manipulation	Działo, E., Rudnik, M., et al.	Int J Mol Sci	2019	30901906	WNT3a and WNT5a Transported by Exosomes Activate WNT Signaling Pathways in Human Cardiac Fibroblasts.
Excluded - Cell manipulation	Shi, Y., Yang, Y., et al.	Stem Cells Dev	2019	30896296	Exosomes Derived from Human Umbilical Cord Mesenchymal Stem Cells Promote Fibroblast-to-Myofibroblast Differentiation in Inflammatory Environments and Benefit Cardioprotective Effects
Excluded - Cell manipulation	Hou, Z., Qin, X., et al.	Circ Res	2019	30879399	Longterm Exercise-Derived Exosomal miR-342-5p: A Novel Exerkine for Cardioprotection.
Excluded - Cell manipulation	Sun, X.H., Wang, X., et al.	Thromb Res	2019	30844685	Exosomes of bone-marrow stromal cells inhibit cardiomyocyte apoptosis under ischemic and hypoxic conditions via miR-486-5p targeting the PTEN/PI3K/AKT signaling pathway.
Excluded - Cell manipulation	Zhao, J., Li, X., et al.	Cardiovasc Res	2019	30753344	Mesenchymal stromal cell-derived exosomes attenuate myocardial ischaemia-reperfusion injury through miR-182-regulated macrophage polarization
Excluded - Cell manipulation	Gong, X.H., Liu, H., et al.	J Cell Physiol	2019	30720220	Exosomes derived from SDF1-overexpressing mesenchymal stem cells inhibit ischemic myocardial cell apoptosis and promote cardiac endothelial microvascular regeneration in mice with myocardial infarction.
Excluded - Cell manipulation	Eirin, A., Zhu, X.Y., et al.	Stem Cells Transl Med	2019	30707002	Metabolic Syndrome Interferes with Packaging of Proteins within Porcine Mesenchymal Stem Cell-Derived Extracellular Vesicles.
Excluded - Cell manipulation	Ciullo, A., Biemmi, V., et al.	Int J Mol Sci	2019	30678240	Exosomal Expression of CXCR4 Targets Cardioprotective Vesicles to Myocardial Infarction and Improves Outcome after Systemic Administration.
Excluded - Cell manipulation	Yang, J., Yu, X., et al.	Am J Transl Res	2018	30662677	Exosomes derived from cardiomyocytes promote cardiac fibrosis via myocyte-fibroblast cross-talk.
Excluded - Cell manipulation	Jiang, X., Lew, K.S., et al.	Curr Pharm Des	2019	30659531	Human mesenchymal stem cell-derived exosomes reduce ischemia/reperfusion injury by the inhibitions of apoptosis and autophagy.
Excluded - Cell manipulation	Hogan, S.E., Rodriguez Salazar, M.P., et al.	Am J Physiol Lung Cell Mol Physiol	2019	30652491	Mesenchymal stromal cell-derived exosomes improve mitochondrial health in pulmonary arterial hypertension
Excluded - Cell manipulation	Youn, S.W., Li, Y., et al.	Antioxidants (Basel)	2019	30634641	Modification of Cardiac Progenitor Cell-Derived Exosomes by miR-322 Provides Protection against Myocardial Infarction through Nox2-Dependent Angiogenesis.
Excluded - Cell manipulation	Zhu, L.P., Tian, T., et al.	Theranostics	2018	30613290	Hypoxia-elicited mesenchymal stem cell-derived exosomes facilitates cardiac repair through miR-125b-mediated prevention of cell death in myocardial infarction.
Excluded - Cell manipulation	Yuan, K., Shamskhou, E.A., et al.	Circulation	2019	30586764	Loss of Endothelium-Derived Wnt5a Is Associated With Reduced Pericyte Recruitment and Small Vessel Loss in Pulmonary Arterial Hypertension.
Excluded - Cell manipulation	Liu, Y., Liu, Z., et al.	J Cardiovasc Transl Res	2019	30499000	Serum Extracellular Vesicles Retard H9C2 Cell Senescence by Suppressing miR-34a Expression
Excluded - Cell manipulation	Duan, M.J., Yan, M.L., et al.	Cell Commun Signal	2018	30497498	Overexpression of miR-1 in the heart attenuates hippocampal synaptic vesicle exocytosis by the posttranscriptional regulation of SNAP-25 through the transportation of exosomes.
Excluded - Cell manipulation	Wang, D., Gao, B., et al.	J Cell Mol Med	2019	30484954	Exosomes from mesenchymal stem cells expressing miR-125b inhibit neointimal hyperplasia via myosin IE
Excluded - Cell manipulation	Kong, J., Wang, F., et al.	J Surg Res	2018	30463748	Exosomes of Endothelial Progenitor Cells Inhibit Neointima Formation After Carotid Artery Injury.
Excluded - Cell manipulation	Ontoria-Oviedo, I., Dorronsoro, A., et al.	Front Cardiovasc Med	2018	30410918	Extracellular Vesicles Secreted by Hypoxic AC10 Cardiomyocytes Modulate Fibroblast Cell Motility
Excluded - Cell manipulation	Gartz, M., Darlington, A., et al.	Sci Rep	2018	30410044	Exosomes exert cardioprotection in dystrophin-deficient cardiomyocytes via ERK1/2-p38/MAPK signaling
Excluded - Cell manipulation	Chen, H.S., Tong H.S., et al.	Med Sci Monit	2018	30399613	Differential Expression Pattern of Exosome Long Non-Coding RNAs (lncRNAs) and MicroRNAs (miRNAs) in Vascular Endothelial Cells Under Heat Stroke
Excluded - Cell manipulation	Wang, X., Chen, Y., et al.	J Am Heart Assoc	2018	30371236	Engineered Exosomes With Ischemic Myocardium-Targeting Peptide for Targeted Therapy in Myocardial Infarction
Excluded - Cell manipulation	Davidson, S. M., Riquelme, J. A., et al.	Sci Rep	2018	30367147	Endothelial cells release cardioprotective exosomes that may contribute to ischaemic preconditioning
Excluded - Cell manipulation	Pan, J., Alimujiang, M., et al.	J Cell Biochem	2018	30362610	Exosomes derived from miR-146a-modified adipose-derived stem cells attenuate acute myocardial infarction-induced myocardial damage via downregulation of early growth response factor 1
Excluded - Cell manipulation	Tong, Y., Ye, C., et al.	Hypertension	2018	30354715	Exosome-Mediated Transfer of ACE (Angiotensin-Converting Enzyme) From Adventitial Fibroblasts of Spontaneously Hypertensive Rats Promotes Vascular Smooth Muscle Cell Migration
Excluded - Cell manipulation	He, J. G., Xie, Q. L., et al.	Cell Transplant	2018	30311501	Exosomes Derived from IDO1-Overexpressing Rat Bone Marrow Mesenchymal Stem Cells Promote Immunotolerance of Cardiac Allografts
Excluded - Cell manipulation	Wang, Y., Ma, W.Q., et al.	Front Endocrinol (Lausanne)	2018	30298051	Exosomes Derived From Mesenchymal Stromal Cells Pretreated With Advanced Glycation End Product-Bovine Serum Albumin Inhibit Calcification of Vascular Smooth Muscle Cells.
Excluded - Cell manipulation	Gallo, A., Agnese, V., et al.	Int J Cardiol	2018	30297190	On the prospect of serum exosomal miRNA profiling and protein biomarkers for the diagnosis of ascending aortic dilatation in patients with bicuspid and tricuspid aortic valve.
Excluded - Cell manipulation	Zhang, M., Xin, W., et al.	Cell Death Dis	2018	30282973	Exosomal 15-LO2 mediates hypoxia-induced pulmonary artery hypertension in vivo and in vitro
Excluded - Cell manipulation	Ju, C., Li, Y., et al.	J Cardiovasc Transl Res	2018	30276617	Transplantation of Cardiac Mesenchymal Stem Cell-Derived Exosomes for Angiogenesis.
Excluded - Cell manipulation	Ma, T., Chen, Y., et al.	Stem Cells Int	2018	30271437	MicroRNA-132, Delivered by Mesenchymal Stem Cell-Derived Exosomes, Promote Angiogenesis in Myocardial Infarction.
Excluded - Cell manipulation	Lacy, S.H., Woeller, C.F., et al.	Am J Respir Cell Mol Biol	2019	30265126	Activated Human Lung Fibroblasts Produce Extracellular Vesicles with Antifibrotic Prostaglandins.
Excluded - Cell manipulation	Luo, J., Fan, Y., et al.	Int J Biol Sci	2018	30262994	The Pro-angiogenesis Of Exosomes Derived From Umbilical Cord Blood Of Intrauterine Growth Restriction Pigs Was Repressed Associated With MiRNAs.
Excluded - Cell manipulation	Hu, J., Wang, S., et al.	Biochim Biophys Acta Mol Basis Dis	2018	30251683	Exosomal Mst1 transfer from cardiac microvascular endothelial cells to cardiomyocytes deteriorates diabetic cardiomyopathy.
Excluded - Cell manipulation	Ju, C., Shen, Y., et al.	J Cardiovasc Transl Res	2018	30232729	Transplantation of Cardiac Mesenchymal Stem Cell-Derived Exosomes Promotes Repair in Ischemic Myocardium.
Excluded - Cell manipulation	Ma, C., Wang, J., et al.	Med Sci Sports Exerc	2018	30222687	Moderate Exercise Enhances Endothelial Progenitor Cell Exosomes Release and Function.
Excluded - Cell manipulation	Yoshida, S., Miyagawa, S., et al.	Mol Ther	2018	30217728	Maturation of Human Induced Pluripotent Stem Cell-Derived Cardiomyocytes by Soluble Factors from Human Mesenchymal Stem Cells.
Excluded - Cell manipulation	Luo, H., Li, X., et al.	Cardiovasc Res	2019	30202848	microRNA-423-3p exosomes derived from cardiac fibroblasts mediates the cardioprotective effects of ischaemic post-conditioning
Excluded - Cell manipulation	Andriolo, G., Provasi, E., et al.	Front Physiol	2018	30197601	Exosomes From Human Cardiac Progenitor Cells for Therapeutic Applications: Development of a GMP-Grade Manufacturing Method.
Excluded - Cell manipulation	Nie, X., Fan, J., et al.	Mol Ther Nucleic Acids	2018	30195764	miR-217 Promotes Cardiac Hypertrophy and Dysfunction by Targeting PTEN.
Excluded - Cell manipulation	Shi, C., Ulke-Lemée, A., et al.	FASEB J	2018	30188755	Characterization of heat shock protein 27 in extracellular vesicles: a potential anti-inflammatory therapy.
Excluded - Cell manipulation	Nie, H., Pan, Y., et al.	Biochem Biophys Res Commun	2018	30170731	Exosomal microRNA-194 causes cardiac injury and mitochondrial dysfunction in obese mice.
Excluded - Cell manipulation	Wang, Y., Zhao, R., et al.	Oxid Med Cell Longev	2018	30159114	Exosomes Derived from miR-214-Enriched Bone Marrow-Derived Mesenchymal Stem Cells Regulate Oxidative Damage in Cardiac Stem Cells by Targeting CaMKII.
Excluded - Cell manipulation	Su, X., Jin, Y., et al.	J Cardiovasc Transl Res	2018	30155598	Exosome-Derived Dystrophin from Allograft Myogenic Progenitors Improves Cardiac Function in Duchenne Muscular Dystrophic Mice.
Excluded - Cell manipulation	Sun, J., Zhang, Z., et al.	Stem Cell Res Ther	2018	30139377	Endothelial progenitor cell-derived exosomes, loaded with miR-126, promoted deep vein thrombosis resolution and recanalization.
Excluded - Cell manipulation	Hosseinkhani, B., Kuypers, S., et al.	Front Immunol	2018	30131806	Extracellular Vesicles Work as a Functional Inflammatory Mediator Between Vascular Endothelial Cells and Immune Cells.
Excluded - Cell manipulation	Sun, X., Shan, A., et al.	Biochem Biophys Res Commun	2018	30126637	Intravenous mesenchymal stem cell-derived exosomes ameliorate myocardial inflammation in the dilated cardiomyopathy.
Excluded - Cell manipulation	Xiao, C., Wang, K., et al.	Circ Res	2018	29921652	Transplanted Mesenchymal Stem Cells Reduce Autophagic Flux in Infarcted Hearts via the Exosomal Transfer of miR-125b.
Excluded - Cell manipulation	Otani, K., Yokoya, M., et al.	Biochem Biophys Res Commun	2018	29913142	Plasma exosomes regulate systemic blood pressure in rats
Excluded - Cell manipulation	He, J.G., Li, H.R., et al.	Sci Rep	2018	29899566	GATA-4-expressing mouse bone marrow mesenchymal stem cells improve cardiac function after myocardial infarction via secreted exosomes
Excluded - Cell manipulation	Cambier, L., Giani, J.F., et al.	Hypertension	2018	29866742	Angiotensin II-Induced End-Organ Damage in Mice Is Attenuated by Human Exosomes and by an Exosomal Y RNA Fragment.
Excluded - Cell manipulation	Li, S., Jiang, J., et al.	Int J Mol Med	2018	29786755	Cardiac progenitor cell‑derived exosomes promote H9C2 cell growth via Akt/mTOR activation.
Excluded - Cell manipulation	Sun, L.L., Duan, M.J., et al.	J Mol Cell Cardiol	2018	29775643	Myocardial infarction-induced hippocampal microtubule damage by cardiac originating microRNA-1 in mice.
Excluded - Cell manipulation	Huang, C., Han, J., et al.	Mol Med Rep	2018	29750307	Exosomal MALAT1 derived from oxidized low-density lipoprotein-treated endothelialcells promotes M2 macrophage polarization.
Excluded - Cell manipulation	Yang, Y., Cai, Y., et al.	J Mol Neurosci	2018	29705934	Exosomes Secreted by Adipose-Derived Stem Cells Contribute to Angiogenesis of Brain Microvascular Endothelial Cells Following Oxygen-Glucose Deprivation In Vitro Through MicroRNA-181b/TRPM7 Axis.
Excluded - Cell manipulation	Luther, K.M., Haar, L., et al.	J Mol Cell Cardiol	2018	29698635	Exosomal miR-21a-5p mediates cardioprotection by mesenchymal stem cells.
Excluded - Cell manipulation	Qiu, H., Shi, S., et al.	Proteomics Clin Appl	2018	29687628	Proteomic Profiling Exosomes from Vascular Smooth Muscle Cell
Excluded - Cell manipulation	Wang, F., Chen, F.F., et al.	Int J Cardiol	2018	29685689	Insulin resistance adipocyte-derived exosomes aggravate atherosclerosis by increasing vasa vasorum angiogenesis in diabetic ApoE-/- mice.
Excluded - Cell manipulation	Ferrer, E., Dunmore, B.J., et al.	Am J Respir Cell Mol Biol	2018	29676587	A Potential Role for Exosomal Translationally Controlled Tumor Protein Export in Vascular Remodeling in Pulmonary Arterial Hypertension
Excluded - Cell manipulation	Obata, Y., Kita, S., et al.	JCI Insight	2018	29669945	Adiponectin/T-cadherin system enhances exosome biogenesis and decreases cellular ceramides by exosomal release.
Excluded - Cell manipulation	Kanda, P., Alarcon, E.I., et al.	ACS Nano	2018	29660269	Deterministic Encapsulation of Human Cardiac Stem Cells in Variable Composition Nanoporous Gel Cocoons To Enhance Therapeutic Repair of Injured Myocardium
Excluded - Cell manipulation	Speziali, G., Liesinger, L., et al.	J Proteomics	2018	29654920	Myristic acid induces proteomic and secretomic changes associated with steatosis,cytoskeleton remodeling, endoplasmic reticulum stress, protein turnover and exosome release in HepG2 cells.
Excluded - Cell manipulation	Mattapally, S., Zhu, W., et al.	Am J Physiol Heart Circ Physiol	2018	29631371	Spheroids of cardiomyocytes derived from human-induced pluripotent stem cells improve recovery from myocardial injury in mice
Excluded - Cell manipulation	Ma, X., Wang, J., et al.	Cell Physiol Biochem	2018	29621777	Loading MiR-210 in Endothelial Progenitor Cells Derived Exosomes Boosts Their Beneficial Effects on Hypoxia/Reoxygeneation-Injured Human Endothelial Cells via Protecting Mitochondrial Function.
Excluded - Cell manipulation	Kim, H., Yun, N., et al.	Biochem Biophys Res Commun	2018	29621543	Cardiac-specific delivery by cardiac tissue-targeting peptide-expressing exosomes.
Excluded - Cell manipulation	Nguyen, C.T., Dawkins, J., et al.	JACC Basic Transl Sci	2018	29600288	Diffusion Tensor Cardiac Magnetic Resonance Reveals Exosomes From Cardiosphere-Derived Cells Preserve Myocardial Fiber Architecture After Myocardial Infarction.
Excluded - Cell manipulation	Loyer, X., Zlatanova, I., et al.	Circ Res	2018	29592957	Intra-Cardiac Release of Extracellular Vesicles Shapes Inflammation Following Myocardial Infarction.
Excluded - Cell manipulation	Vandergriff, A., Huang, K., et al.	Theranostics	2018	29556361	Targeting regenerative exosomes to myocardial infarction using cardiac homing peptide.
Excluded - Cell manipulation	Ruan, X.F., Li, Y.J., et al.	Acta Pharmacol Sin	2018	29542684	Exosomes from Suxiao Jiuxin pill-treated cardiac mesenchymal stem cells decrease H3K27 demethylase UTX expression in mouse cardiomyocytes in vitro.
Excluded - Cell manipulation	Ruan, X.F., Ju, C.W., et al.	Acta Pharmacol Sin	2018	29542682	Suxiao Jiuxin pill promotes exosome secretion from mouse cardiac mesenchymal stem cells in vitro
Excluded - Cell manipulation	Wider, J., Undyala, V.V.R., et al.	Basic Res Cardiol	2018	29524006	Remote ischemic preconditioning fails to reduce infarct size in the Zucker fatty rat model of type-2 diabetes: role of defective humoral communication.
Excluded - Cell manipulation	Barile, L., Cervio, E., et al.	Cardiovasc Res	2018	29518183	Cardioprotection by cardiac progenitor cell-secreted exosomes: role of pregnancy-associated plasma protein-A
Excluded - Cell manipulation	Hu, M., Guo, G., et al.	Cell Death Dis	2018	29500342	The harsh microenvironment in infarcted heart accelerates transplanted bone marrow mesenchymal stem cells injury: the role of injured cardiomyocytes-derived exosomes.
Excluded - Cell manipulation	Wang, X.L., Zhao, Y.Y., et al.	Int J Mol Med	2018	29484378	Exosomes derived from human umbilical cord mesenchymal stem cells improve myocardial repair via upregulation of Smad7.
Excluded - Cell manipulation	Aminzadeh, M.A., Rogers, R.G., et al.	Stem Cell Reports	2018	29478899	Exosome-Mediated Benefits of Cell Therapy in Mouse and Human Models of Duchenne Muscular Dystrophy.
Excluded - Cell manipulation	He, S., Wu, C., et al.	Scand J Immunol	2018	29465752	Endothelial extracellular vesicles modulate the macrophage phenotype: Potential implications in atherosclerosis.
Excluded - Cell manipulation	Mayourian, J., Ceholski, D.K., et al.	Circ Res	2018	29449318	Exosomal microRNA-21-5p Mediates Mesenchymal Stem Cell Paracrine Effects on Human Cardiac Tissue Contractility.
Excluded - Cell manipulation	Shi, B., Wang, Y., et al.	PLoS One	2018	29444190	Bone marrow mesenchymal stem cell-derived exosomal miR-21 protects C-kit+ cardiac stem cells from oxidative injury through the PTEN/PI3K/Akt axis.
Excluded - Cell manipulation	Xian, X., Gong, Q., et al.	J Endod	2018	29426641	Exosomes with Highly Angiogenic Potential for Possible Use in Pulp Regeneration.
Excluded - Cell manipulation	Li, P., Liu, Z., et al.	J Cardiovasc Transl Res	2019	29404859	Serum Exosomes Attenuate H(2)O(2)-Induced Apoptosis in Rat H9C2 Cardiomyocytes via ERK1/2
Excluded - Cell manipulation	Tian, C., Gao, L., et al.	Am J Physiol Heart Circ Physiol	2018	29373037	Myocardial infarction-induced microRNA-enriched exosomes contribute to cardiac Nrf2 dysregulation in chronic heart failure.
Excluded - Cell manipulation	Nie, S., Wang, X., et al.	Sci Rep	2018	29371689	Biologically active constituents of the secretome of human W8B2+ cardiac stem cells.
Excluded - Cell manipulation	Ferguson, S.W., Wang, J., et al.	Sci Rep	2018	29362496	The microRNA regulatory landscape of MSC-derived exosomes: a systems view.
Excluded - Cell manipulation	Takeda, M., Kanki, Y., et al.	Cell Rep	2018	29320747	Identification of Cardiomyocyte-Fated Progenitors from Human-Induced Pluripotent Stem Cells Marked with CD82.
Excluded - Cell manipulation	Yang, J., Li, Y., et al.	Am J Transl Res	2017	29312490	Exosomes derived from cardiac telocytes exert positive effects on endothelial cells.
Excluded - Cell manipulation	Khalyfa, A., Youssefnia, N., et al.	Front Neurol	2017	29312130	Plasma Exosomes and Improvements in Endothelial Function by Angiotensin 2 Type 1 Receptor or Cyclooxygenase 2 Blockade following Intermittent Hypoxia.
Excluded - Cell manipulation	Waters, R., Alam, P., et al.	Acta Biomater	2018	29281806	Stem cell-inspired secretome-rich injectable hydrogel to repair injured cardiac tissue
Excluded - Cell manipulation	Dautova, Y., Kapustin, A.N., et al.	J Mol Cell Cardiol	2018	29274344	Calcium phosphate particles stimulate interleukin-1β release from human vascular smooth muscle cells: A role for spleen tyrosine kinase and exosome release.
Excluded - Cell manipulation	Namazi, H., Mohit, E., et al.	J Cell Biochem	2018	29243842	Exosomes secreted by hypoxic cardiosphere-derived cells enhance tube formation and increase pro-angiogenic miRNA.
Excluded - Cell manipulation	Luo, Q., Guo, D., et al.	Cell Physiol Biochem	2017	29241208	Exosomes from MiR-126-Overexpressing Adscs Are Therapeutic in Relieving Acute Myocardial Ischaemic Injury.
Excluded - Cell manipulation	Gao, L., Gregorich, Z.R., et al.	Circulation	2018	29233823	Large Cardiac Muscle Patches Engineered From Human Induced-Pluripotent Stem Cell-Derived Cardiac Cells Improve Recovery From Myocardial Infarction in Swine
Excluded - Cell manipulation	Chen, Y., Zhao, Y., et al.	Stem Cell Res Ther	2017	29178928	MicroRNA-133 overexpression promotes the therapeutic efficacy of mesenchymal stem cells on acute myocardial infarction.
Excluded - Cell manipulation	Zhu, J., Lu, K., et al.	Artif Cells Nanomed Biotechnol	2018	29141446	Myocardial reparative functions of exosomes from mesenchymal stem cells are enhanced by hypoxia treatment of the cells via transferring microRNA-210 in annSMase2-dependent way.
Excluded - Cell manipulation	Martinus, R.D., Goldsbury, J.	Cell Stress Chaperones	2018	29134442	Endothelial TNF-α induction by Hsp60 secreted from THP-1 monocytes exposed to hyperglycaemic conditions
Excluded - Cell manipulation	Lamichhane, T.N., Leung, C.A., et al.	Sci Rep	2017	29062004	Ethanol Induces Enhanced Vascularization Bioactivity of Endothelial Cell-Derived Extracellular Vesicles via Regulation of MicroRNAs and Long Non-Coding RNAs
Excluded - Cell manipulation	Tong, M., Stanley, J.L., et al.	Hum Reprod	2017	29040541	Placental Nano-vesicles Target to Specific Organs and Modulate Vascular Tone In Vivo.
Excluded - Cell manipulation	Chen, N.X., O'Neill, K.D., et al.	Kidney Int	2018	29032812	Matrix vesicles induce calcification of recipient vascular smooth muscle cells through multiple signaling pathways.
Excluded - Cell manipulation	Grigorian-Shamagian, L., Liu, W., et al.	Eur Heart J	2017	29020403	Cardiac and systemic rejuvenation after cardiosphere-derived cell therapy in senescent rats.
Excluded - Cell manipulation	Torán, J.L., Aguilar, S., et al.	Sci Rep	2017	28970523	CXCL6 is an important paracrine factor in the pro-angiogenic human cardiac progenitor-like cell secretome
Excluded - Cell manipulation	Ke, X., Yang, D., et al.	DNA Cell Biol	2017	28920705	Human Endothelial Progenitor Cell-Derived Exosomes Increase Proliferation and Angiogenesis in Cardiac Fibroblasts by Promoting the Mesenchymal-Endothelial Transition and Reducing High Mobility Group Box 1 Protein B1 Expression
Excluded - Cell manipulation	Na, M., Kwon, K., et al.	Biomaterials	2017	28898757	Extracellular matrix-derived extracellular vesicles promote cardiomyocyte growth and electrical activity in engineered cardiac atria
Excluded - Cell manipulation	Ribeiro-Rodrigues, T.M., Laundos, T.L., et al.	Cardiovasc Res	2017	28859292	Exosomes secreted by cardiomyocytes subjected to ischaemia promote cardiac angiogenesis.
Excluded - Cell manipulation	Liu, L., Jin, X., et al.	Cell Physiol Biochem	2017	28848091	Exosomes Derived from Mesenchymal Stem Cells Rescue Myocardial Ischaemia/Reperfusion Injury by Inducing Cardiomyocyte Autophagy Via AMPK and Akt Pathways.
Excluded - Cell manipulation	Davidson, S.M., Riquelme, J.A., et al.	J Cell Mol Med	2018	28840975	Cardioprotection mediated by exosomes is impaired in the setting of type II diabetes but can be rescued by the use of non-diabetic exosomes in vitro.
Excluded - Cell manipulation	Chang, T.Y., Tsai, W.C., et al.	PLoS One	2017	28727754	Dysregulation of endothelial colony-forming cell function by a negative feedback loop of circulating miR-146a and -146b in cardiovascular disease patients.
Excluded - Cell manipulation	Lee, W.H., Chen, W.Y., et al.	Stem Cells	2017	28710827	Comparison of Non-Coding RNAs in Exosomes and Functional Efficacy of Human Embryonic Stem Cell- versus Induced Pluripotent Stem Cell-Derived Cardiomyocytes.
Excluded - Cell manipulation	Mu, X., Wang, X., et al.	Shock	2018	28650928	Circulating Exosomes Isolated from Septic Mice Induce Cardiovascular Hyperpermeability Through Promoting Podosome Cluster Formation.
Excluded - Cell manipulation	Mayourian, J., Cashman, T.J., et al.	Circ Res	2017	28642329	Experimental and Computational Insight Into Human Mesenchymal Stem Cell Paracrine Signaling and Heterocellular Coupling Effects on Cardiac Contractility and Arrhythmogenicity.
Excluded - Cell manipulation	Cosme, J., Guo, H., et al.	J Proteome Res	2017	28641008	Hypoxia-Induced Changes in the Fibroblast Secretome, Exosome, and Whole-Cell Proteome Using Cultured, Cardiac-Derived Cells Isolated from Neonatal Mice.
Excluded - Cell manipulation	Moisseiev, E., Anderson, J.D., et al.	Curr Eye Res	2017	28636406	Protective Effect of Intravitreal Administration of Exosomes Derived from Mesenchymal Stem Cells on Retinal Ischemia.
Excluded - Cell manipulation	Cui, X., He, Z., et al.	J Cardiovasc Pharmacol	2017	28582278	Exosomes From Adipose-derived Mesenchymal Stem Cells Protect the Myocardium Against Ischemia/Reperfusion Injury Through Wnt/β-Catenin Signaling Pathway.
Excluded - Cell manipulation	Ye, W., Tang, X., et al.	Mol Immunol	2017	28433888	Plasma-derived exosomes contribute to inflammation via the TLR9-NF-κB pathway in chronic heart failure patients.
Excluded - Cell manipulation	de Couto, G., Gallet, R., et al.	Circulation	2017	28411247	Exosomal MicroRNA Transfer Into Macrophages Mediates Cellular Postconditioning.
Excluded - Cell manipulation	Zheng, B., Yin, W.N., et al.	Mol Ther	2017	28408180	Exosome-Mediated miR-155 Transfer from Smooth Muscle Cells to Endothelial Cells Induces Endothelial Injury and Promotes Atherosclerosis.
Excluded - Cell manipulation	Gonzalez-King, H., García, N.A., et al.	Stem Cells	2017	28376567	Hypoxia Inducible Factor-1α Potentiates Jagged 1-Mediated Angiogenesis by Mesenchymal Stem Cell-Derived Exosomes.
Excluded - Cell manipulation	Cui, L., Rashdan, N.A., et al.	J Cell Physiol	2017	28369848	End stage renal disease-induced hypercalcemia may promote aortic valve calcification via Annexin VI enrichment of valve interstitial cell derived-matrix vesicles
Excluded - Cell manipulation	Zhang, J., Ma, J., et al.	Int J Mol Sci	2017	28350318	Overexpression of Exosomal Cardioprotective miRNAs Mitigates Hypoxia-Induced H9c2 Cells Apoptosis.
Excluded - Cell manipulation	Mathiyalagan, P., Liang, Y., et al.	Circ Res	2017	28298297	Angiogenic Mechanisms of Human CD34+ Stem Cell Exosomes in the Repair of Ischemic Hindlimb.
Excluded - Cell manipulation	de Gonzalo-Calvo, D., van der Meer, R.W., et al.	Sci Rep	2017	28246388	Serum microRNA-1 and microRNA-133a levels reflect myocardial steatosis in uncomplicated type 2 diabetes.
Excluded - Cell manipulation	Shao, L., Zhang, Y., et al.	Biomed Res Int	2017	28203568	MiRNA-Sequence Indicates That Mesenchymal Stem Cells and Exosomes Have Similar Mechanism to Enhance Cardiac Repair.
Excluded - Cell manipulation	Wang, K., Jiang, Z., et al.	Stem Cells Transl Med	2017	28170197	Enhanced Cardioprotection by Human Endometrium Mesenchymal Stem Cells Driven by Exosomal MicroRNA-21.
Excluded - Cell manipulation	Ma, J., Zhao, Y., et al.	Stem Cells Transl Med	2017	28170176	Exosomes Derived from Akt-Modified Human Umbilical Cord Mesenchymal Stem Cells Improve Cardiac Regeneration and Promote Angiogenesis via Activating Platelet-Derived Growth Factor D
Excluded - Cell manipulation	Cambier, L., de Couto, G., et al.	EMBO Mol Med	2017	28167565	Y RNA fragment in extracellular vesicles confers cardioprotection via modulation of IL-10 expression and secretion.
Excluded - Cell manipulation	Beltrami, C., Besnier, M., et al.	Mol Ther	2017	28159509	Human Pericardial Fluid Contains Exosomes Enriched with Cardiovascular-Expressed MicroRNAs and Promotes Therapeutic Angiogenesis.
Excluded - Cell manipulation	Gallet, R., Dawkins, J., et al.	Eur Heart J	2017	28158410	Exosomes secreted by cardiosphere-derived cells reduce scarring, attenuate adverse remodelling, and improve function in acute and chronic porcine myocardial infarction.
Excluded - Cell manipulation	Jiang, X., Sucharov, J., et al.	Am J Physiol Heart Circ Physiol	2017	28130338	Exosomes from pediatric dilated cardiomyopathy patients modulate a pathological response in cardiomyocytes.
Excluded - Cell manipulation	Wang, C., Zhang, C., et al.	Mol Ther	2017	28129114	Macrophage-Derived mir-155-Containing Exosomes Suppress Fibroblast Proliferation and Promote Fibroblast Inflammation during Cardiac Injury.
Excluded - Cell manipulation	Kapustin, A.N., Schoppet, M., et al.	Arterioscler Thromb Vasc Biol	2017	28104608	Prothrombin Loading of Vascular Smooth Muscle Cell-Derived Exosomes Regulates Coagulation and Calcification.
Excluded - Cell manipulation	Chen, J., Cui, C., et al.	Transl Stroke Res	2017	28101763	MiR-126 Affects Brain-Heart Interaction after Cerebral Ischemic Stroke.
Excluded - Cell manipulation	Datta, R., Bansal, T., et al.	Mol Cell Biol	2017	28031326	Myocyte-Derived Hsp90 Modulates Collagen Upregulation via Biphasic Activation of STAT-3 in Fibroblasts during Cardiac Hypertrophy.
Excluded - Cell manipulation	Sharma, S., Mishra, R., et al.	Circ Res	2017	27908912	A Deep Proteome Analysis Identifies the Complete Secretome as the Functional Unit of Human Cardiac Progenitor Cells.
Excluded - Cell manipulation	Agarwal, U., George, A., et al.	Circ Res	2017	27872050	Experimental, Systems, and Computational Approaches to Understanding the MicroRNA-Mediated Reparative Potential of Cardiac Progenitor Cell-Derived Exosomes From Pediatric Patients.
Excluded - Cell manipulation	Lang, J.K., Young, R.F., et al.	PLoS One	2016	27806113	Inhibiting Extracellular Vesicle Release from Human Cardiosphere Derived Cells with Lentiviral Knockdown of nSMase2 Differentially Effects Proliferation and Apoptosis in Cardiomyocytes, Fibroblasts and Endothelial Cells In Vitro.
Excluded - Cell manipulation	Fang, X., Stroud, M.J., et al.	JCI Insight	2016	27734035	Adipocyte-specific loss of PPARγ attenuates cardiac hypertrophy.
Excluded - Cell manipulation	Pang, P., Abbott, M., et al.	Kidney Int	2017	27692806	Human vascular progenitor cells derived from renal arteries are endothelial-like and assist in the repair of injured renal capillary networks.
Excluded - Cell manipulation	Li, L., Wang, Z., et al.	Biochem Biophys Res Commun	2016	27644883	Human aortic smooth muscle cell-derived exosomal miR-221/222 inhibits autophagy via a PTEN/Akt signaling pathway in human umbilical vein endothelial cells.
Excluded - Cell manipulation	Vrijsen, K.R., Maring, J.A., et al.	Adv Healthc Mater	2016	27570124	Exosomes from Cardiomyocyte Progenitor Cells and Mesenchymal Stem Cells Stimulate Angiogenesis Via EMMPRIN.
Excluded - Cell manipulation	Gao, W., Liu, H., et al.	J Cell Mol Med	2016	27515767	Exosomes derived from mature dendritic cells increase endothelial inflammation and atherosclerosis via membrane TNF-α mediated NF-κB pathway.
Excluded - Cell manipulation	Cui, C., Ye, X., et al.	Stem Cells Transl Med	2016	27460851	miR-145 Regulates Diabetes-Bone Marrow Stromal Cell-Induced Neurorestorative Effects in Diabetes Stroke Rats.
Excluded - Cell manipulation	Xiao, J., Pan, Y., et al.	Cell Death Dis	2016	27336721	Cardiac progenitor cell-derived exosomes prevent cardiomyocytes apoptosis through exosomal miR-21 by targeting PDCD4.
Excluded - Cell manipulation	Wang, X., Gu, H., et al.	Diabetes	2016	27284111	Hsp20-Mediated Activation of Exosome Biogenesis in Cardiomyocytes Improves Cardiac Function and Angiogenesis in Diabetic Mice.
Excluded - Cell manipulation	Shan, K., Jiang, Q., et al.	Cell Death Dis	2016	27253412	Role of long non-coding RNA-RNCR3 in atherosclerosis-related vascular dysfunction.
Excluded - Cell manipulation	Tang, N., Sun, B., et al.	FASEB J	2016	27226520	Monocyte exosomes induce adhesion molecules and cytokines via activation of NF-κB in endothelial cells.
Excluded - Cell manipulation	Mayfield, A.E., Fitzpatrick, M.E., et al.	Stem Cell Res Ther	2016	27225482	The impact of patient co-morbidities on the regenerative capacity of cardiac explant-derived stem cells.
Excluded - Cell manipulation	Kervadec, A., Bellamy, V., et al.	J Heart Lung Transplant	2016	27041495	Cardiovascular progenitor-derived extracellular vesicles recapitulate the beneficial effects of their parent cells in the treatment of chronic heart failure.
Excluded - Cell manipulation	Perrotta, I., Aquila, S., et al.	Ultrastruct Pathol	2016	27031176	Exosomes in human atherosclerosis: An ultrastructural analysis study.
Excluded - Cell manipulation	Song, J., Huang, J., et al.	Sci Rep	2016	26822278	Donor-derived exosomes induce specific regulatory T cells to suppress immune inflammation in the allograft heart.
Excluded - Cell manipulation	Ramakrishnan, D.P., Hajj-Ali, R.A., et al.	Arterioscler Thromb Vasc Biol	2016	26821945	Extracellular Vesicles Activate a CD36-Dependent Signaling Pathway to Inhibit Microvascular Endothelial Cell Migration and Tube Formation.
Excluded - Cell manipulation	Zhang, Z., Yang, J., et al.	J Am Heart Assoc	2016	26811168	Pretreatment of Cardiac Stem Cells With Exosomes Derived From Mesenchymal Stem Cells Enhances Myocardial Repair.
Excluded - Cell manipulation	Li, X., Chen, C., et al.	Cytotherapy	2016	26794715	Exosomes derived from endothelial progenitor cells attenuate vascular repair and accelerate reendothelialization by enhancing endothelial function.
Excluded - Cell manipulation	Liu, H., Gao, W., et al.	J Mol Cell Cardiol	2016	26746143	Exosomes derived from dendritic cells improve cardiac function via activation of CD4(+) T lymphocytes after myocardial infarction.
Excluded - Cell manipulation	Connolly, K.D., Guschina, I.A., et al.	J Extracell Vesicles	2015	26609807	Characterisation of adipocyte-derived extracellular vesicles released pre- and post-adipogenesis.
Excluded - Cell manipulation	Garcia, N.A., Moncayo-Arlandi, J., et al.	Cardiovasc Res	2016	26609058	Cardiomyocyte exosomes regulate glycolytic flux in endothelium by direct transfer of GLUT transporters and glycolytic enzymes.
Excluded - Cell manipulation	Sampey, G.C., Saifuddin, M., et al.	J Biol Chem	2016	26553869	Exosomes from HIV-1-infected Cells Stimulate Production of Pro-inflammatory Cytokines through Trans-activating Response (TAR) RNA.
Excluded - Cell manipulation	Lyu, L., Wang, H., et al.	J Mol Cell Cardiol	2015	26497614	A critical role of cardiac fibroblast-derived exosomes in activating renin angiotensin system in cardiomyocytes.
Excluded - Cell manipulation	Gioia, M., Vindigni, G., et al.	PLoS One	2015	26495844	Membrane Cholesterol Modulates LOX-1 Shedding in Endothelial Cells.
Excluded - Cell manipulation	Garcia, N.A., Ontoria-Oviedo, I., et al.	PLoS One	2015	26393803	Glucose Starvation in Cardiomyocytes Enhances Exosome Secretion and Promotes Angiogenesis in Endothelial Cells.
Excluded - Cell manipulation	Wang, X., Gu, H., et al.	Sci Rep	2015	26348153	Exosomal miR-223 Contributes to Mesenchymal Stem Cell-Elicited Cardioprotection in Polymicrobial Sepsis.
Excluded - Cell manipulation	Deng, L., Blanco, F.J., et al.	Circ Res	2015	26311719	MicroRNA-143 Activation Regulates Smooth Muscle and Endothelial Cell Crosstalk in Pulmonary Arterial Hypertension.
Excluded - Cell manipulation	Madrigal-Matute, J., Fernandez-Garcia, C.E., et al.	Free Radic Biol Med	2015	26117319	Thioredoxin-1/peroxiredoxin-1 as sensors of oxidative stress mediated by NADPH oxidase activity in atherosclerosis.
Excluded - Cell manipulation	Wang, Y., Zhang, L., et al.	Int J Cardiol	2015	26000464	Exosomes/microvesicles from induced pluripotent stem cells deliver cardioprotective miRNAs and prevent cardiomyocyte apoptosis in the ischemic myocardium.
Excluded - Cell manipulation	Pironti, G., Strachan, R.T., et al.	Circulation	2015	25995315	Circulating Exosomes Induced by Cardiac Pressure Overload Contain Functional Angiotensin II Type 1 Receptors.
Excluded - Cell manipulation	Khan, M., Nickoloff, E., et al.	Circ Res	2015	25904597	Embryonic stem cell-derived exosomes promote endogenous repair mechanisms and enhance cardiac function following myocardial infarction.
Excluded - Cell manipulation	Vicencio, J.M., Yellon, D.M., et al.	J Am Coll Cardiol	2015	25881934	Plasma exosomes protect the myocardium from ischemia-reperfusion injury.
Excluded - Cell manipulation	Chaturvedi, P., Kalani, A., et al.	J Cell Mol Med	2015	25824442	Cardiosome mediated regulation of MMP9 in diabetic heart: role of mir29b and mir455 in exercise.
Excluded - Cell manipulation	Kapustin, A.N., Chatrou, M.L., et al.	Circ Res	2015	25711438	Vascular smooth muscle cell calcification is mediated by regulated exosome secretion.
Excluded - Cell manipulation	Yu, B., Kim, H.W., et al.	Int J Cardiol	2015	25590961	Exosomes secreted from GATA-4 overexpressing mesenchymal stem cells serve as a reservoir of anti-apoptotic microRNAs for cardioprotection.
Excluded - Cell manipulation	Song, J., Chen, X., et al.	Sci Rep	2014	25533220	Cardiac endothelial cell-derived exosomes induce specific regulatory B cells.
Excluded - Cell manipulation	Izarra, A., Moscoso, I., et al.	Stem Cell Reports	2014	25465869	miR-133a enhances the protective capacity of cardiac progenitors cells after myocardial infarction
Excluded - Cell manipulation	Bollmann, F., Art, J., et al.	Nucleic Acids Res	2014	25352548	Resveratrol post-transcriptionally regulates pro-inflammatory gene expression via regulation of KSRP RNA binding activity.
Excluded - Cell manipulation	Gray, W.D., French, K.M., et al.	Circ Res	2015	25344555	Identification of therapeutic covariant microRNA clusters in hypoxia-treated cardiac progenitor cell exosomes using systems biology.
Excluded - Cell manipulation	Fertig, E.T., Gherghiceanu, M., et al.	J Cell Mol Med	2014	25257228	Extracellular vesicles release by cardiac telocytes: electron microscopy and electron tomography.
Excluded - Cell manipulation	Ong, S.G., Lee, W.H., et al.	Circulation	2014	25200057	Cross talk of combined gene and cell therapy in ischemic heart disease: role of exosomal microRNA transfer.
Excluded - Cell manipulation	Madrigal-Matute, J., Lindholt, J.S., et al.	J Am Heart Assoc	2014	25095870	Galectin-3, a biomarker linking oxidative stress and inflammation with the clinical outcomes of patients with atherothrombosis.
Excluded - Cell manipulation	Kranendonk, M.E., Visseren, F.L., et al.	Obesity (Silver Spring)	2014	25045057	Effect of extracellular vesicles of human adipose tissue on insulin signaling in liver and muscle cells.
Excluded - Cell manipulation	Barile, L., Lionetti, V., et al.	Cardiovasc Res	2014	25016614	Extracellular vesicles from human cardiac progenitor cells inhibit cardiomyocyte apoptosis and improve cardiac function after myocardial infarction.
Excluded - Cell manipulation	Ibrahim, A.G., Cheng, K., et al.	Stem Cell Reports	2014	24936449	Exosomes as critical agents of cardiac regeneration triggered by cell therapy.
Excluded - Cell manipulation	Wang, X., Huang, W., et al.	J Mol Cell Cardiol	2014	24825548	Cardiomyocytes mediate anti-angiogenesis in type 2 diabetic rats through the exosomal transfer of miR-320 into endothelial cells.
Excluded - Cell manipulation	Bang, C., Batkai, S., et al.	J Clin Invest	2014	24743145	Cardiac fibroblast-derived microRNA passenger strand-enriched exosomes mediate cardiomyocyte hypertrophy.
Excluded - Cell manipulation	Lopatina, T., Bruno, S., et al.	Cell Commun Signal	2014	24725987	Platelet-derived growth factor regulates the secretion of extracellular vesicles by adipose mesenchymal stem cells and enhances their angiogenic potential.
Excluded - Cell manipulation	Feng, Y., Huang, W., et al.	PLoS One	2014	24558412	Ischemic preconditioning potentiates the protective effect of stem cells through secretion of exosomes by targeting Mecp2 via miR-22.
Excluded - Cell manipulation	Giricz, Z., Varga, Z.V., et al.	J Mol Cell Cardiol	2014	24440457	Cardioprotection by remote ischemic preconditioning of the rat heart is mediated by extracellular vesicles.
Excluded - Cell manipulation	Bian, S., Zhang, L., et al.	J Mol Med (Berl)	2014	24337504	Extracellular vesicles derived from human bone marrow mesenchymal stem cells promote angiogenesis in a rat myocardial infarction model.
Excluded - Cell manipulation	Feng, Y., Huang, W., et al.	Stem Cells	2014	24123326	Heat shock improves Sca-1+ stem cell survival and directs ischemic cardiomyocytes toward a prosurvival phenotype via exosomal transfer: a critical role for HSF1/miR-34a/HSP70 pathway.
Excluded - Cell manipulation	Salomon, C., Ryan, J., et al.	PLoS One	2013	23861904	Exosomal signaling during hypoxia mediates microvascular endothelial cell migration and vasculogenesis.
Excluded - Cell manipulation	Halkein, J., Tabruyn, S.P., et al.	J Clin Invest	2013	23619365	MicroRNA-146a is a therapeutic target and biomarker for peripartum cardiomyopathy.
Excluded - Cell manipulation	New, S.E., Goettsch, C., et al.	Circ Res	2013	23616621	Macrophage-derived matrix vesicles: an alternative novel mechanism for microcalcification in atherosclerotic plaques
Excluded - Cell manipulation	Chen, N.X., O'Neill, K., et al.	Am J Nephrol	2013	23466870	Transglutaminase 2 accelerates vascular calcification in chronic kidney disease.
Excluded - Cell manipulation	Askar, S.F., Ramkisoensing, A.A., et al.	Circ Arrhythm Electrophysiol	2013	23420831	Engraftment patterns of human adult mesenchymal stem cells expose electrotonic and paracrine proarrhythmic mechanisms in myocardial cell cultures.
Excluded - Cell manipulation	Arslan, F., Lai, R.C., et al.	Stem Cell Res	2013	23399448	Mesenchymal stem cell-derived exosomes increase ATP levels, decrease oxidative stress and activate PI3K/Akt pathway to enhance myocardial viability and prevent adverse remodeling after myocardial ischemia/reperfusion injury.
Excluded - Cell manipulation	Malik, Z.A., Kott, K.S., et al.	Am J Physiol Heart Circ Physiol	2013	23376832	Cardiac myocyte exosomes: stability, HSP60, and proteomics.
Excluded - Cell manipulation	Chen, L., Wang, Y., et al.	Biochem Biophys Res Commun	2013	23318173	Cardiac progenitor-derived exosomes protect ischemic myocardium from acute ischemia/reperfusion injury.
Excluded - Cell manipulation	Spinetti, G., Fortunato, O., et al.	Circ Res	2013	23233752	MicroRNA-15a and microRNA-16 impair human circulating proangiogenic cell functions and are increased in the proangiogenic cells and serum of patients with critical limb ischemia.
Excluded - Cell manipulation	Mocharla, P., Briand, S., et al.	Blood	2013	23144172	AngiomiR-126 expression and secretion from circulating CD34(+) and CD14(+) PBMCs: role for proangiogenic effects and alterations in type 2 diabetics.
Excluded - Cell manipulation	Yu, X., Deng, L., et al.	J Mol Cell Cardiol	2012	23085511	Mechanism of TNF-α autocrine effects in hypoxic cardiomyocytes: initiated by hypoxia inducible factor 1α, presented by exosomes.
Excluded - Cell manipulation	Cheng, Y., Wang, X., et al.	J Mol Cell Cardiol	2012	22921780	A translational study of urine miRNAs in acute myocardial infarction.
Excluded - Cell manipulation	Mackie, A.R., Klyachko, E., et al.	Circ Res	2012	22581926	Sonic hedgehog-modified human CD34+ cells preserve cardiac function after acute myocardial infarction.
Excluded - Cell manipulation	Waldenström, A., Gennebäck, N., et al.	PLoS One	2012	22506041	Cardiomyocyte microvesicles contain DNA/RNA and convey biological messages to target cells.
Excluded - Cell manipulation	Zhang, X., Wang, X., et al.	PLoS One	2012	22427880	Hsp20 functions as a novel cardiokine in promoting angiogenesis via activation of VEGFR2.
Excluded - Cell manipulation	Hergenreider, E., Heydt, S., et al.	Nat Cell Biol	2012	22327366	Atheroprotective communication between endothelial cells and smooth muscle cells through miRNAs.
Excluded - Cell manipulation	Sahoo, S., Klychko, E., et al.	Circ Res	2011	21835908	Exosomes from human CD34(+) stem cells mediate their proangiogenic paracrine activity.
Excluded - Cell manipulation	Kuwabara, Y., Ono, K., et al.	Circ Cardiovasc Genet	2011	21642241	Increased microRNA-1 and microRNA-133a levels in serum of patients with cardiovascular disease indicate myocardial damage.
Excluded - Cell manipulation	Vrijsen, K.R., Sluijter, J.P., et al.	J Cell Mol Med	2010	20465578	Cardiomyocyte progenitor cell-derived exosomes stimulate migration of endothelial cells.
Excluded - Cell manipulation	Zhan, R., Leng, X., et al.	Biochem Biophys Res Commun	2009	19555663	Heat shock protein 70 is secreted from endothelial cells by a non-classical pathway involving exosomes.
Excluded - Cell manipulation	Gambim, M.H., do Carmo Ade, O., et al.	Crit Care	2007	17894858	Platelet-derived exosomes induce endothelial cell apoptosis through peroxynitrite generation: experimental evidence for a novel mechanism of septic vascular dysfunction.
Excluded - Cell manipulation	Gupta, S., Knowlton, A.A., et al.	Am J Physiol Heart Circ Physiol	2007	17307989	HSP60 trafficking in adult cardiac myocytes: role of the exosomal pathway.
Excluded - Cell manipulation	Al-Nedawi, K., Szemraj, J., et al.	Arterioscler Thromb Vasc Biol	2005	15920032	Mast cell-derived exosomes activate endothelial cells to secrete plasminogen activator inhibitor type 1.
Excluded - Heat maps/PC analysis results	Gao, L., Mei, S., et al.	Theranostics	2020	31938051	Cardio-renal Exosomes in Myocardial Infarction Serum Regulate Proangiogenic Paracrine Signaling in Adipose Mesenchymal Stem Cells
Excluded - Heat maps/PC analysis results	Wang, Y.F., Lian, X.L., et al.	IUBMB Life	2019	30724444	Serum exosomal microRNA let-7i-3p as candidate diagnostic biomarker for Kawasaki disease patients with coronary artery aneurysm
Excluded - Heat maps/PC analysis results	Yang, J., Xue, F.T., et al.	Eur Rev Med Pharmacol Sci	2018	30536343	Exosomal piRNA sequencing reveals differences between heart failure and healthy patients.
Excluded - Heat maps/PC analysis results	Danielson, K.M., Shah, R., et al.	EBioMedicine	2018	29779700	Plasma Circulating Extracellular RNAs in Left Ventricular Remodeling Post-Myocardial Infarction.
Excluded - Heat maps/PC analysis results	Li, H., Liao, Y., et al.	Theranostics	2018	29721064	Coronary Serum Exosomes Derived from Patients with Myocardial Ischemia Regulate Angiogenesis through the miR-939-mediated Nitric Oxide Signaling Pathway.
Excluded - Heat maps/PC analysis results	Gonzalez-Calero, L., Martínez, P.J., et al.	Oncotarget	2017	28562335	Urinary exosomes reveal protein signatures in hypertensive patients with albuminuria.
Excluded - Heat maps/PC analysis results	Shi, R., Zhao, L., et al.	Biochem Biophys Res Commun	2017	27998767	Maternal exosomes in diabetes contribute to the cardiac development deficiency.
Excluded - Review	Maghin, E., Garbati, P., et al.	Front Bioeng Biotechnol	2020	32478060	Young at Heart: Combining Strategies to Rejuvenate Endogenous Mechanisms of Cardiac Repair
Excluded - Review	Mancuso, T., Barone, A., et al.	Int J Mol Sci	2020	32466282	Unravelling the Biology of Adult Cardiac Stem Cell-Derived Exosomes to Foster Endogenous Cardiac Regeneration and Repair
Excluded - Review	Duan, B.	J Transl Int Med	2020	32435608	Concise Review: Harnessing iPSC-derived Cells for Ischemic Heart Disease Treatment
Excluded - Review	Picca, A., Guerra, F., et al.	J Clin Med	2020	32408624	Generation and Release of Mitochondrial-Derived Vesicles in Health, Aging and Disease
Excluded - Review	Gareev, I., Beylerli, O., et al.	Clin Exp Med	2020	32399814	The current state of MiRNAs as biomarkers and therapeutic tools
Excluded - Review	Tan, S.J.O., Floriano, J.F., et al.	Biomolecules	2020	32370160	Novel Applications of Mesenchymal Stem Cell-derived Exosomes for Myocardial Infarction Therapeutics
Excluded - Review	Khoei, S.G., Dermani, F.K., et al.	Curr Stem Cell Res Ther	2020	32357818	The Use of Mesenchymal Stem Cells and Their Derived Extracellular Vesicles in Cardiovascular Disease Treatment
Excluded - Review	He, N., Zhang, Y., et al.	J Cardiovasc Transl Res	2020	32333198	Exosomes: Cell-Free Therapy for Cardiovascular Diseases
Excluded - Review	Zadeh, F.J., Ghasemi, Y., et al.	Mol Biol Rep	2020	32319009	Do exosomes play role in cardiovascular disease development in hematological malignancy?
Excluded - Review	Liao, X., Yang, X., et al.	Front Bioeng Biotechnol	2020	32296694	Injectable Hydrogel-Based Nanocomposites for Cardiovascular Diseases
Excluded - Review	Richard, A.J., White, U., et al.	In: Endotext [Internet]. South Dartmouth (MA): MDText.com, Inc.	2020	32255578	Adipose Tissue: Physiology to Metabolic Dysfunction
Excluded - Review	Jia, Y., Wei, Y.	Int J Mol Sci	2020	32235299	Modulators of MicroRNA Function in the Immune System
Excluded - Review	Guo, Y., Chen, J., et al.	Front Physiol	2020	32210839	Novel Mechanisms of Exercise-Induced Cardioprotective Factors in Myocardial Infarction
Excluded - Review	Balbi, C., Costa, A., et al.	Cells	2020	32183455	Message in a Bottle: Upgrading Cardiac Repair into Rejuvenation
Excluded - Review	Floriano, J.F., Willis, G., et al.	Cells	2020	32164322	Exosomes Could Offer New Options to Combat the Long-Term Complications Inflicted by Gestational Diabetes Mellitus
Excluded - Review	Tikhomirov, R., Donnell, B.R., et al.	Cells	2020	32131460	Exosomes: From Potential Culprits to New Therapeutic Promise in the Setting of Cardiac Fibrosis
Excluded - Review	Banks, W.A.	Curr Pharm Des	2020	32122292	A Spectrum of Topics for 2019: Advances in Neuroinflammation, Oxidative Stress, Obesity, Diabetes Mellitus, Cardiovascular Disease, Autism, Exosomes, and Central Nervous System Diseases
Excluded - Review	Fan, C., Zhang, E., et al.	Front Cell Dev Biol	2020	32117968	Utilization of Human Induced Pluripotent Stem Cells for Cardiac Repair
Excluded - Review	Gururaja Rao, S., Patel, N.J.,	Front Physiol	2020	32116799	Intracellular Chloride Channels: Novel Biomarkers in Diseases
Excluded - Review	Jadli, A.S., Ballasy, N., et al.	Mol Cell Biochem	2020	32088833	Inside(sight) of tiny communicator: exosome biogenesis, secretion, and uptake
Excluded - Review	Fu, J.L., Yu, Q., et al.	J Biochem Mol Toxicol	2020	32045083	Deleterious cardiovascular effect of exosome in digitalis-treated decompensated congestive heart failure
Excluded - Review	Xiao, Y., Zhong, J., et al.	Cancer Lett	2020	32044357	Exosomes as potential sources of biomarkers in colorectal cancer
Excluded - Review	Nik Mohamed Kamal, N.N.S.B., Shahidan, W.N.S.	Front Pharmacol	2020	32038230	Non-Exosomal and Exosomal Circulatory MicroRNAs: Which Are More Valid as Biomarkers?
Excluded - Review	Kalluri, R., LeBleu, V.S.	Science	2020	32029601	The biology, function, and biomedical applications of exosomes
Excluded - Review	Jafarinia, M., Alsahebfosoul, F., et al.	Immunol Invest	2020	32009478	Mesenchymal Stem Cell-Derived Extracellular Vesicles: A Novel Cell-Free Therapy
Excluded - Review	Baruah, J., Wary, K.K.	Front Cell Dev Biol	2019	31998716	Exosomes in the Regulation of Vascular Endothelial Cell Regeneration
Excluded - Review	Pérez, P.S., Romaniuk, M.A., et al.	J Extracell Vesicles	2019	31998449	Extracellular vesicles and chronic inflammation during HIV infection
Excluded - Review	Li, Y., Yin, P., et al.	Front Endocrinol (Lausanne)	2019	31920965	Bone-Derived Extracellular Vesicles: Novel Players of Interorgan Crosstalk
Excluded - Review	Liu, Y., Weng, W., et al.	Oxid Med Cell Longev	2020	31915506	New Insights for Cellular and Molecular Mechanisms of Aging and Aging-Related Diseases: Herbal Medicine as Potential Therapeutic Approach
Excluded - Review	Ouweneel, A.B., Thomas, M.J., et al.	J Lipid Res	2020	31888980	The ins and outs of lipid rafts: functions in intracellular cholesterol homeostasis, microparticles, and cell membranes
Excluded - Review	Gon, Y., Shimizu, T., et al.	Respirology	2019	31872560	Molecular techniques for respiratory diseases: MicroRNA and extracellular vesicles
Excluded - Review	Ranjan, P., Kumari, R., et al.	Front Cell Dev Biol	2019	31867328	Cardiac Fibroblasts and Cardiac Fibrosis: Precise Role of Exosomes
Excluded - Review	de Couto, G.	Exp Mol Med	2019	31857583	Macrophages in cardiac repair: Environmental cues and therapeutic strategies
Excluded - Review	Khalyfa, A., Castro-Grattoni, A.L., et al.	Ther Adv Respir Dis	2020	31852426	Cardiovascular morbidities of obstructive sleep apnea and the role of circulating extracellular vesicles
Excluded - Review	Hajibabaie, F., Kouhpayeh, S., et al.	J Physiol Biochem	2019	31808077	MicroRNAs as the actors in the atherosclerosis scenario
Excluded - Review	Tian, J., Popal, M.S., et al.	Aging Dis	2020	31788341	Interplay between Exosomes and Autophagy in Cardiovascular Diseases: Novel Promising Target for Diagnostic and Therapeutic Application
Excluded - Review	Maeda, N., Funahashi, T., et al.	Atherosclerosis	2020	31731079	Adiponectin, a unique adipocyte-derived factor beyond hormones
Excluded - Review	Liu, A., Zhang, X., et al.	Expert Opin Biol Ther	2019	31701782	Therapeutic potential of mesenchymal stem/stromal cell-derived secretome and vesicles for lung injury and disease
Excluded - Review	Akbar, N., Azzimato, V., et al.	Diabetologia	2019	31690986	Extracellular vesicles in metabolic disease
Excluded - Review	Tielking, K., Fischer, S., et al.	Front Mol Neurosci	2020	31680858	Extracellular RNA in Central Nervous System Pathologies
Excluded - Review	Chung, I.M., Rajakumar, G., et al.	Clin Chim Acta	2019	31678573	Exosomes: Current use and future applications
Excluded - Review	Jaquenod De Giusti, C., Santalla, M., et al.	J Mol Cell Cardiol	2020	31669445	Exosomal non-coding RNAs (Exo-ncRNAs) in cardiovascular health
Excluded - Review	Peng, M., Liu, X., et al.	J Cardiovasc Transl Res	2019	31664614	Extracellular Vesicles as Messengers in Atherosclerosis
Excluded - Review	Upadhya, D., Shetty, A.K.	Curr Pharm	2019	31612823	Extracellular Vesicles as Therapeutics for Brain Injury and Disease
Excluded - Review	Ji, C., Guo, X.	Nat Rev Endocrinol	2019	31611648	The clinical potential of circulating microRNAs in obesity
Excluded - Review	Jiang, W., Wang, M.	Rev Cardiovasc Med	2019	31601089	New insights into the immunomodulatory role of exosomes in cardiovascular disease
Excluded - Review	Zhou, H., Wang, B., et al.	Biomed Pharmacother	2019	31586900	Exosomes in ischemic heart disease: novel carriers for bioinformation
Excluded - Review	Lam, N.T., Gartz, M., et al.	J Muscle Res Cell Motil	2019	31564031	Influence of microRNAs and exosomes in muscle health and diseases
Excluded - Review	Wang, L., Jia, Q., et al.	J Cell Mol Med	2019	31557390	Role of cardiac progenitor cell-derived exosome-mediated microRNA-210 in cardiovascular disease
Excluded - Review	Lumbers, E.R., Delforce, S.J., et al.	Front Endocrinol (Lausanne)	2019	31551925	Causes and Consequences of the Dysregulated Maternal Renin-Angiotensin System in Preeclampsia
Excluded - Review	Yang, W., Zou, B., et al.	Clin Chim Acta	2019	31493375	Extracellular vesicles in vascular calcification
Excluded - Review	Kita, S., Maeda, N., et al.	J Clin Invest	2019	31483293	Interorgan communication by exosomes, adipose tissue, and adiponectin in metabolic syndrome
Excluded - Review	Wu, X., Showiheen, S.A.A.,et al.	Methods Mol Biol	2019	31482448	Exosomes Extraction and Identification
Excluded - Review	Yu, H., Wang, Z.	Front Physiol	2020	31481897	Cardiomyocyte-Derived Exosomes: Biological Functions and Potential Therapeutic Implications
Excluded - Review	Jafarzadeh-Esfehani, R., Soudyab, M., et al.	Curr Drug Targets	2019	31433753	Circulating Exosomes and Their Role in Stroke
Excluded - Review	Riancho, J., Santurtun, A., et al.	Methods Mol Biol	2019	31432424	Characterization of Alzheimer's Disease Micro-RNA Profile in Exosome-Enriched CSF Samples
Excluded - Review	Cao, Q., Guo, Z., et al.	IUBMB Life	2019	31386311	Exosomal long noncoding RNAs in aging and age-related diseases
Excluded - Review	Kubiritova, Z., Radvanszky, J., et al.	Int J Mol Sci	2019	31357438	Cell-Free Nucleic Acids and their Emerging Role in the Pathogenesis and Clinical Management of Inflammatory Bowel Disease
Excluded - Review	Svenningsen, P., Sabaratnam, R., et al.	Acta Physiol (Oxf)	2020	31334916	Urinary extracellular vesicles: Origin, role as intercellular messengers and biomarkers
Excluded - Review	Lin, Y., Lu, Y., et al.	J Drug Target	2020	31280623	Biological characteristics of exosomes and genetically engineered exosomes for the targeted delivery of therapeutic agents
Excluded - Review	Aghabozorgi, A.S., Ahangari, N., et al.	J Cell Physiol	2019	31273798	Circulating exosomal miRNAs in cardiovascular disease pathogenesis: New emerging hopes
Excluded - Review	Abbaszadeh, H., Ghorbani, F., et al.	J Cell Physiol	2020	31254289	Human umbilical cord mesenchymal stem cell-derived extracellular vesicles: A novel therapeutic paradigm
Excluded - Review	Xu, M.Y., Ye, Z.S., et al.	Stem Cell Res Ther	2019	31248454	Differences in the cargos and functions of exosomes derived from six cardiac cell types: a systematic review
Excluded - Review	Zarà, M., Guidetti, G.F., et al.	Int J Mol Sci	2019	31212641	Biology and Role of Extracellular Vesicles (EVs) in the Pathogenesis of Thrombosis
Excluded - Review	Gorabi, A.M., Kiaie, N., et al.	Mol Neurobiol	2019	31197655	The Therapeutic Potential of Mesenchymal Stem Cell-Derived Exosomes in Treatment of Neurodegenerative Diseases
Excluded - Review	Basu, B., Ghosh, M.K.	Bioessays	2019	31188499	Extracellular Vesicles in Glioma: From Diagnosis to Therapy
Excluded - Review	Rezaie, J., Rahbarghazi, R., et al.	J Cell Physiol	2019	31140622	Cardioprotective role of extracellular vesicles: A highlight on exosome beneficial effects in cardiovascular diseases
Excluded - Review	Wang, W., Wang, Y., et al.	PeerJ	2019	31119072	Circular RNAs as potential biomarkers and therapeutics for cardiovascular disease
Excluded - Review	Khalyfa, A., Gozal, D.	Curr Sleep Med Rep	2018	31106116	Connexins and Atrial Fibrillation in Obstructive Sleep Apnea
Excluded - Review	Haddad, G., Lorenzen, J.M.	Front Pharmacol	2019	31080413	Biogenesis and Function of Circular RNAs in Health and in Disease
Excluded - Review	Wang, Y., Xie, Y., et al.	Biomed Pharmacother	2019	31078042	Exosomes: An emerging factor in atherosclerosis
Excluded - Review	Terenzi, D.C., Trac, J.Z., et al.	Trends Mol Med	2019	31053416	Vascular Regenerative Cell Exhaustion in Diabetes: Translational Opportunities to Mitigate Cardiometabolic Risk
Excluded - Review	Yin, K., Wang, S., et al.	Biomark Res	2019	30992990	Exosomes from mesenchymal stem/stromal cells: a new therapeutic paradigm
Excluded - Review	Wu, R., Gao, W., et al.	Front Immunol	2019	30984201	Roles of Exosomes Derived From Immune Cells in Cardiovascular Diseases
Excluded - Review	Deng, W., Tang, T., et al.	Clin Chim Acta	2019	30959044	Extracellular vesicles in atherosclerosis
Excluded - Review	Moghaddam, A. S., Afshari, J.T., et al.	Atherosclerosis	2019	30939341	Cardioprotective microRNAs: Lessons from stem cell-derived exosomal microRNAs to treat cardiovascular disease.
Excluded - Review	Saeedi, S., Israel, S., et al.	Transl Psychiatry	2019	30923321	The emerging role of exosomes in mental disorders
Excluded - Review	Wernly, B., Mirna, M., et al.	Int J Mol Sci	2019	30901815	Regenerative Cardiovascular Therapies: Stem Cells and Beyond.
Excluded - Review	Nazari-Shafti, T.Z., Stamm, C., et al.	Eur Heart J	2019	30896768	Exosomes for Cardioprotection: Are We Ready for Clinical Translation?
Excluded - Review	Monguió-Tortajada, M., Gálvez-Montón, C., et al.	Cell Mol Life Sci	2019	30891621	Extracellular vesicle isolation methods: rising impact of size-exclusion chromatography.
Excluded - Review	Lanyu, Z. and Feilong, H.	Biomed Pharmacother	2019	30877881	Emerging role of extracellular vesicles in lung injury and inflammation.
Excluded - Review	Mehdizadeh, A., Barzegar, M., et al.	Acta Neurol Belg	2019	30868468	The current and emerging therapeutic approaches in drug-resistant epilepsy management.
Excluded - Review	Yun, C.W. and Lee, S.H.	Int J Mol Sci	2019	30813471	Enhancement of Functionality and Therapeutic Efficacy of Cell-Based Therapy Using Mesenchymal Stem Cells for Cardiovascular Disease.
Excluded - Review	Chen, B.Y., Sung, C.W., et al.	Clin Chim Acta	2019	30797770	Advances in exosomes technology.
Excluded - Review	Bellin, G., Gardin, C., et al.	Cells	2019	30781555	Exosome in Cardiovascular Diseases: A Complex World Full of Hope.
Excluded - Review	Yuan, L., Li, J.Y.	ACS Chem Neurosci	2019	30664350	Exosomes in Parkinson's Disease: Current Perspectives and Future Challenges
Excluded - Review	Blaser, M.C. and Aikawa, E.	Front Cardiovasc Med	2018	30622949	Roles and Regulation of Extracellular Vesicles in Cardiovascular Mineral Metabolism.
Excluded - Review	Sáez, T., Toledo, F., et al.	Mol Aspects Med	2019	30610887	Impaired signalling pathways mediated by extracellular vesicles in diabesity.
Excluded - Review	Davidson, S.M., Andreadou, I., et al.	Cardiovasc Res	2018	30590395	Circulating blood cells and extracellular vesicles in acute cardioprotection.
Excluded - Review	Wadley, G.D., Lamon, S., et al.	J Appl Physiol	2018	30571279	Non-coding RNAs regulating cardiac muscle mass.
Excluded - Review	Parizadeh, S.M., Jafarzadeh-Esfehani, R., et al.	Curr Pharm Des	2018	30569849	Circulating Exosomes as Potential Biomarkers in Cardiovascular Disease.
Excluded - Review	Johnson, T., Zhao, L., et al.	J Mol Med (Berl)	2019	30554258	Approaches to therapeutic angiogenesis for ischemic heart disease.
Excluded - Review	Huang, K., Hu, S., et al.	Adv Healthc Mater	2019	30548836	A New Era of Cardiac Cell Therapy: Opportunities and Challenges
Excluded - Review	Ryu, A.R., Kim, D.H., et al.	Oxid Med Cell Longev	2018	30524655	The Potential Roles of Extracellular Vesicles in Cigarette Smoke-Associated Diseases.
Excluded - Review	Shanmuganathan, M., Vughs, J., et al.	Front Physiol	2018	30524292	Exosomes: Basic Biology and Technological Advancements Suggesting Their Potential as Ischemic Heart Disease Therapeutics.
Excluded - Review	Ghafarian, F., Pashirzad, M., et al.	J Cell Physiol	2018	30536994	The clinical impact of exosomes in cardiovascular disorders: From basic science to clinical application.
Excluded - Review	Beuzelin, D. and Kaeffer, B.	Front Immunol	2018	30519245	Exosomes and miRNA-Loaded Biomimetic Nanovehicles, a Focus on Their Potentials Preventing Type-2 Diabetes Linked to Metabolic Syndrome.
Excluded - Review	Das, C.K., Jena, B.C., et al.	Mol Pharm	2019	30513203	Exosome as a Novel Shuttle for Delivery of Therapeutics across Biological Barriers
Excluded - Review	Kim, A., Shah, A.S., et al.	Children (Basel)	2018	30445758	Extracellular Vesicles: A Potential Novel Regulator of Obesity and Its Associated Complications.
Excluded - Review	Bollini, S., Smits, A.M., et al.	Front Physiol	2018	30405446	Triggering Endogenous Cardiac Repair and Regeneration via Extracellular Vesicle-Mediated Communication.
Excluded - Review	Zamani, P., Fereydouni, N., et al.	Trends Cardiovasc Med	2018	30385010	The therapeutic and diagnostic role of exosomes in cardiovascular diseases.
Excluded - Review	Pan, W., Zhu, Y., et al.	J Cardiovasc Transl Res	2019	30374796	Immunomodulation by Exosomes in Myocardial Infarction.
Excluded - Review	Letsiou, E., Bauer, N.	Curr Top Membr	2018	30360780	Endothelial Extracellular Vesicles in Pulmonary Function and Disease
Excluded - Review	Cesselli, D., Parisse, P., et al.	Front Physiol	2018	30327618	Extracellular Vesicles: How Drug and Pathology Interfere With Their Biogenesis and Function.
Excluded - Review	Nawaz, M., Shah, N., et al.	Cells	2018	30322133	Extracellular Vesicles and Matrix Remodeling Enzymes: The Emerging Roles in Extracellular Matrix Remodeling, Progression of Diseases and Tissue Repair.
Excluded - Review	Fan, Y., Chen, M., et al.	Crit Rev Ther Drug Carrier Syst	2018	30317945	Updated Progress of Nanocarrier-Based Intranasal Drug Delivery Systems for Treatment of Brain Diseases.
Excluded - Review	Khan, A.R., Yang, X., et al.	J Control Release	2018	30308256	Recent progress of drug nanoformulations targeting to brain
Excluded - Review	Salybekov, A.A., Salybekova, A.K., et al.	Int J Mol Sci	2018	30301174	Sonic Hedgehog Signaling Pathway in Endothelial Progenitor Cell Biology for Vascular Medicine.
Excluded - Review	Darband, S.G., Mirza-Aghazadeh-Attari, M., et al.	J Control Release	2018	30290245	Exosomes: natural nanoparticles as bio shuttles for RNAi delivery.
Excluded - Review	Saez, T., Toledo, F., et al.	Curr Vasc Pharmacol	2018	30277159	Extracellular vesicles and insulin resistance: a potential interaction in vascular dysfunction.
Excluded - Review	Tao, L., Shi, J., et al.	J Cardiovasc Transl Res	2019	30251219	The Exosome: a New Player in Diabetic Cardiomyopathy
Excluded - Review	Lazar, E., Benedek, T., et al.	World J Stem Cells	2018	30190780	Stem cell-derived exosomes - an emerging tool for myocardial regeneration.
Excluded - Review	Li, N., Rochette, L., et al.	J Cardiovasc Transl Res	2019	30173401	New Insights into the Role of Exosomes in the Heart After Myocardial Infarction.
Excluded - Review	Ormazabal, V., Nair, S., et al.	Cardiovasc Diabetol	2018	30170598	Association between insulin resistance and the development of cardiovascular disease.
Excluded - Review	Farzaneh, M., Rahimi, F., et al.	Curr Stem Cell Res Ther	2019	30152289	Paracrine Mechanisms Involved in Mesenchymal Stem Cell Differentiation into Cardiomyocytes
Excluded - Review	Willis, G.R., Fernandez-Gonzalez, A., et al.	Int J Mol Sci	2018	30150544	Macrophage Immunomodulation: The Gatekeeper for Mesenchymal Stem Cell Derived-Exosomes in Pulmonary Arterial Hypertension?
Excluded - Review	Abbasian, N., Herbert, K.E., et al.	Am J Physiol Renal Physiol	2018	30110570	Vesicles bearing gifts: the functional importance of micro-RNA transfer in extracellular vesicles in chronic kidney disease.
Excluded - Review	Pagano, F., Picchio, V., et al.	Curr Cardiol Rep	2018	30105430	The Biological Mechanisms of Action of Cardiac Progenitor Cell Therapy.
Excluded - Review	Otero-Ortega, L., Laso-García, F., et al.	Transl Stroke Res	2019	30105420	Role of Exosomes as a Treatment and Potential Biomarker for Stroke
Excluded - Review	Terashvili, M. and Bosnjak, Z.J.	J Cardiothorac Vasc Anesth	2019	30029992	Stem Cell Therapies in Cardiovascular Disease.
Excluded - Review	Yao, Y., Liao, W., et al.	Nanomedicine (Lond)	2018	30028249	Potentials of combining nanomaterials and stem cell therapy in myocardial repair.
Excluded - Review	Garikipati, V.N.S., Shoja-Taheri, F., et al.	Circ Res	2018	29976687	Extracellular Vesicles and the Application of System Biology and Computational Modeling in Cardiac Repair
Excluded - Review	Kir, D., Schnettler, E., et al.	Angiogenesis	2018	29956018	Regulation of angiogenesis by microRNAs in cardiovascular diseases
Excluded - Review	Hosseini-Beheshti, E., Grau, G.E.R.	Microcirculation	2019	29923276	Extracellular vesicles and microvascular pathology: Decoding the active dialogue
Excluded - Review	Rackov, G., Garcia-Romero, N., et al.	Front Physiol	2018	29922170	Vesicle-Mediated Control of Cell Function: The Role of Extracellular Matrix and Microenvironment.
Excluded - Review	Yuan, Y., Du, W., et al.	Front Pharmacol	2018	29904347	Stem Cell-Derived Exosome in Cardiovascular Diseases: Macro Roles of Micro Particles.
Excluded - Review	Zhang, C., Zhang, K., et al.	J Cell Mol Med	2018	29892998	Exosomes, the message transporters in vascular calcification.
Excluded - Review	Payab, M., Goodarzi, P., et al.	Adv Exp Med Biol	2018	29876867	Stem Cell and Obesity: Current State and Future Perspective.
Excluded - Review	Gartz, M. and Strande, J.L.	J Am Heart Assoc	2018	29858362	Examining the Paracrine Effects of Exosomes in Cardiovascular Disease and Repair.
Excluded - Review	Adamiak, M. and Sahoo, S.	Mol Ther	2018	29807783	Exosomes in Myocardial Repair: Advances and Challenges in the Development of Next-Generation Therapeutics.
Excluded - Review	Bagno, L., Hatzistergos, K.E., et al.	Mol Ther	2018	29807782	Mesenchymal Stem Cell-Based Therapy for Cardiovascular Disease: Progress and Challenges.
Excluded - Review	Lu, M., Yuan, S., et al.	J Cardiovasc Transl Res	2019	29802541	The Exosome-Derived Biomarker in Atherosclerosis and Its Clinical Application.
Excluded - Review	Deng, H., Sun, C., et al.	Cell Reprogram	2018	29782191	Lipid, Protein, and MicroRNA Composition Within Mesenchymal Stem Cell-Derived Exosomes.
Excluded - Review	Nandi, S.S. and Mishra, P.K.	Adv Exp Med Biol	2018	29754174	Targeting miRNA for Therapy of Juvenile and Adult Diabetic Cardiomyopathy.
Excluded - Review	Wang, Z., Su, X., et al.	J Cardiovasc Transl Res	2018	29744805	Regenerative Therapy for Cardiomyopathies.
Excluded - Review	Hafiane, A. and Daskalopoulou, S.S.	Metabolism	2018	29727628	Extracellular vesicles characteristics and emerging roles in atherosclerotic cardiovascular disease.
Excluded - Review	Klingeborn, M., Stamer, W.D., et al.	Adv Exp Med Biol	2018	29721985	Polarized Exosome Release from the Retinal Pigmented Epithelium.
Excluded - Review	Poe, A.J. and Knowlton, A.A.	Essays Biochem	2018	29717058	Exosomes and cardiovascular cell-cell communication.
Excluded - Review	Benedikter, B.J., Wouters, E.F.M., et al.	J Toxicol Environ Health B Crit Rev	2018	29714636	Extracellular vesicles released in response to respiratory exposures: implications for chronic disease.
Excluded - Review	Gaceb, A., Barbariga, M., et al.	Biochimie	2018	29698670	The pericyte secretome: Potential impact on regeneration.
Excluded - Review	Chen, J., Chopp, M.	Stroke	2018	29669873	Exosome Therapy for Stroke
Excluded - Review	Li, Y., Jin, D., et al.	Curr Stem Cell Res Ther	2018	29623851	Mesenchymal Stem Cells-Derived Exosomes: A Possible Therapeutic Strategy for Osteoporosis.
Excluded - Review	Tong, M., Abrahams, V.M., et al.	Immunol Cell Biol	2018	29604098	Immunological effects of placental extracellular vesicles.
Excluded - Review	Gross, J.C. and Zelarayán, L.C. et al.	Front Cardiovasc Med	2018	29564334	The Mingle-Mangle of Wnt Signaling and Extracellular Vesicles: Functional Implications for Heart Research.
Excluded - Review	Dong, X.	Theranostics	2018	29556336	Current Strategies for Brain Drug Delivery.
Excluded - Review	Walsh, T.G. and Poole, A.W.	Am J Physiol Heart Circ Physiol	2018	29547023	Do platelets promote cardiac recovery after myocardial infarction: roles beyond occlusive ischemic damage.
Excluded - Review	Mentkowski, K.I., Snitzer, J.D., et al.	AAPS J	2018	29546642	Therapeutic Potential of Engineered Extracellular Vesicles.
Excluded - Review	Sun, W., Luo, J.D., et al.	Acta Pharmacol Sin	2018	29542685	Tumor exosomes: a double-edged sword in cancer therapy.
Excluded - Review	Ni, J., Sun, Y., et al.	J Cardiovasc Transl Res	2019	29525884	The Potential of Stem Cells and Stem Cell-Derived Exosomes in Treating Cardiovascular Diseases.
Excluded - Review	Kim, Y.S., Ahn, J.S., et al.	Korean J Physiol Pharmacol	2018	29520164	The potential theragnostic (diagnostic+therapeutic) application of exosomes in diverse biomedical fields.
Excluded - Review	Soleti, R., Andriantsitohaina, R., et al.	Arch Biochem Biophys	2018	29518372	Impact of polyphenols on extracellular vesicle levels and effects and their properties as tools for drug delivery for nutrition and health.
Excluded - Review	Anthiya, S., Griveau, A., et al.	Trends Cancer	2018	29506672	MicroRNA-Based Drugs for Brain Tumors.
Excluded - Review	Sun, Y., Haglund, T.A., et al.	Anal Chim Acta	2018	29475470	Review: Microfluidics technologies for blood-based cancer liquid biopsies.
Excluded - Review	Hutcheson, J.D., Aikawa, E.	Curr Opin Cardiol	2018	29465447	Extracellular vesicles in cardiovascular homeostasis and disease
Excluded - Review	Chen, Y., Li, G., et al.	Genomics Proteomics Bioinformatics	2018	29462670	Microvesicles as Emerging Biomarkers and Therapeutic Targets in Cardiometabolic Diseases.
Excluded - Review	Jia, G., Hill, M.A., et al.	Circ Res	2018	29449364	Diabetic Cardiomyopathy: An Update of Mechanisms Contributing to This Clinical Entity.
Excluded - Review	Mittal, R., Jhaveri, V.M., et al.	Artif Cells Nanomed Biotechnol	2018	29447002	Recent treatment modalities for cardiovascular diseases with a focus on stem cells, aptamers, exosomes and nanomedicine.
Excluded - Review	Sadik, N., Cruz, L., et al.	Methods Mol Biol	2018	29388131	Extracellular RNAs: A New Awareness of Old Perspectives.
Excluded - Review	Manuel, G.E., Johnson, T., et al.	Int J Physiol Pathophysiol Pharmacol	2017	29348795	Therapeutic angiogenesis of exosomes for ischemic stroke.
Excluded - Review	Maring, J.A., Beez, C.M., et al.	Stem Cells Int	2017	29333167	Myocardial Regeneration via Progenitor Cell-Derived Exosomes.
Excluded - Review	Wu, R., Hu, X., et al.	Stem Cells	2018	29330880	Concise Review: Optimized Strategies for Stem Cell-Based Therapy in Myocardial Repair: Clinical Translatability and Potential Limitation.
Excluded - Review	Bakhshian Nik, A., Hutcheson, J.D., et al.	Front Cardiovasc Med	2017	29322046	Extracellular Vesicles As Mediators of Cardiovascular Calcification.
Excluded - Review	Mulder, W.J.M., van Leent, M.M.T., et al.	Acc Chem Res	2018	29281244	High-Density Lipoprotein Nanobiologics for Precision Medicine.
Excluded - Review	Sáez, T., de Vos, P., et al.	Placenta	2018	29277271	Is there a role for exosomes in foetoplacental endothelial dysfunction in gestational diabetes mellitus?
Excluded - Review	Sun, H.J., Zhu, X.X., et al.	Eur Rev Med Pharmacol Sci	2017	29228434	Functional roles of exosomes in cardiovascular disorders: a systematic review.
Excluded - Review	Samanta, S., Rajasingh, S., et al.	Acta Pharmacol Sin	2018	29219950	Exosomes: new molecular targets of diseases.
Excluded - Review	Dougherty, J.A., Mergaye, M., et al.	Stem Cells Int	2017	29163642	Potential Role of Exosomes in Mending a Broken Heart: Nanoshuttles Propelling Future Clinical Therapeutics Forward.
Excluded - Review	Bei, Y., Das, S., et al.	Theranostics	2017	29158817	Extracellular Vesicles in Cardiovascular Theranostics.
Excluded - Review	Ruiz-López, L., Blancas, I., et al.	J Gastroenterol Hepatol	2018	29156509	The role of exosomes on colorectal cancer: A review.
Excluded - Review	Garcia-Romero, N., Esteban-Rubio, S., et al.	Mol Aspects Med	2018	29155161	Extracellular vesicles compartment in liquid biopsies: Clinical application.
Excluded - Review	Davidson, S.M., Yellon, D.M., et al.	Mol Aspects Med	2018	29122678	Exosomes and cardioprotection - A critical analysis.
Excluded - Review	Holdt, L.M., Kohlmaier, A., et al.	Cell Mol Life Sci	2018	29116363	Molecular roles and function of circular RNAs in eukaryotic cells.
Excluded - Review	Li, Y., Han, C., et al.	Adv Exp Med Biol	2017	29098629	Exosomes Mediate the Beneficial Effects of Exercise.
Excluded - Review	Shafei, A.E., Ali, M.A., et al.	J Gene Med	2017	29044850	Mesenchymal stem cell therapy: A promising cell-based therapy for treatment of myocardial infarction.
Excluded - Review	Jayabalan, N., Nair, S., et al.	Front Endocrinol (Lausanne)	2017	29021781	Cross Talk between Adipose Tissue and Placenta in Obese and Gestational Diabetes Mellitus Pregnancies via Exosomes.
Excluded - Review	Zhong, J., Wang, S., et al.	Pediatr Res	2018	29016556	The current status and future of cardiac stem/progenitor cell therapy for congenital heart defects from diabetic pregnancy.
Excluded - Review	Hathaway, Q.A., Pinti, M.V., et al.	Am J Physiol Heart Circ Physiol	2018	28986361	Regulating microRNA expression: at the heart of diabetes mellitus and the mitochondrion.
Excluded - Review	Kuruppu, S., Rajapakse, N.W., et al.	Pharmacol Res Perspect	2017	28971608	Pharmacological hypothesis: Nitric oxide-induced inhibition of ADAM-17 activity as well as vesicle release can in turn prevent the production of soluble endothelin-converting enzyme.
Excluded - Review	Lawson, C., Kovacs, D., et al.	Yale J Biol Med	2017	28955186	Extracellular Vesicles: Evolutionarily Conserved Mediators of Intercellular Communication.
Excluded - Review	Barros, E.R. and Carvajal, C.A.	Front Endocrinol (Lausanne)	2017	28951728	Urinary Exosomes and Their Cargo: Potential Biomarkers for Mineralocorticoid Arterial Hypertension?
Excluded - Review	Lakshmanan, R., Maulik, N.	J Biomed Mater Res B Appl Biomater	2018	28950048	Development of next generation cardiovascular therapeutics through bio-assisted nanotechnology
Excluded - Review	Barani, B., Rajasingh, S., et al.	Adv Exp Med Biol	2017	28936747	Exosomes: Outlook for Future Cell-Free Cardiovascular Disease Therapy.
Excluded - Review	Ding, S., Fan, Z., et al.	Adv Exp Med Biol	2017	28936746	Therapeutic Effects of Ischemic-Preconditioned Exosomes in Cardiovascular Diseases.
Excluded - Review	Bei, Y., Chen, T., et al.	Adv Exp Med Biol	2017	28936745	Circulating Exosomes in Cardiovascular Diseases.
Excluded - Review	Marini, M., Ibba-Manneschi, L., et al.	Adv Exp Med Biol	2017	28936744	Cardiac Telocyte-Derived Exosomes and Their Possible Implications in Cardiovascular Pathophysiology.
Excluded - Review	Radosinska, J. and Bartekova, M.	Adv Exp Med Biol	2017	28936743	Therapeutic Potential of Hematopoietic Stem Cell-Derived Exosomes in Cardiovascular Disease.
Excluded - Review	Mol, E.A., Goumans, M.J., et al.	Adv Exp Med Biol	2017	28936742	Cardiac Progenitor-Cell Derived Exosomes as Cell-Free Therapeutic for Cardiac Repair.
Excluded - Review	Song, Y.H., Shao, L., et al.	Adv Exp Med Biol	2017	28936741	Exosomes Derived from Embryonic Stem Cells as Potential Treatment for Cardiovascular Diseases.
Excluded - Review	Suzuki, E., Fujita, D., et al.	Adv Exp Med Biol	2017	28936740	Therapeutic Effects of Mesenchymal Stem Cell-Derived Exosomes in Cardiovascular Disease.
Excluded - Review	Ding, S., Zhang, J., et al.	Adv Exp Med Biol	2017	28936739	Cardioprotective Effects of Exosomes and Their Potential Therapeutic Use.
Excluded - Review	Liberman, M. and Marti, L.C.	Adv Exp Med Biol	2017	28936738	Vascular Calcification Regulation by Exosomes in the Vascular Wall.
Excluded - Review	Gu, H., Dai, Q., et al.	Adv Exp Med Biol	2017	28936737	Peripartum Cardiomyopathy: Do Exosomes Play a Role?
Excluded - Review	Salem, E.S.B. and Fan, G.C.	Adv Exp Med Biol	2017	28936736	Pathological Effects of Exosomes in Mediating Diabetic Cardiomyopathy.
Excluded - Review	Monteiro, V.V.S., Reis, J.F., et al.	Adv Exp Med Biol	2017	28936735	Dual Behavior of Exosomes in Septic Cardiomyopathy.
Excluded - Review	Huang, Q. and Cai, B.	Adv Exp Med Biol	2017	28936734	Exosomes as New Intercellular Mediators in Development and Therapeutics of Cardiomyocyte Hypertrophy.
Excluded - Review	Bei, Y., Yu, P., et al.	Adv Exp Med Biol	2017	28936733	Exosomes-Based Biomarkers for the Prognosis of Cardiovascular Diseases.
Excluded - Review	Jansen, F. and Li, Q.	Adv Exp Med Biol	2017	28936732	Exosomes as Diagnostic Biomarkers in Cardiovascular Diseases.
Excluded - Review	Vanhaverbeke, M., Gal, D., et al.	Adv Exp Med Biol	2017	28936731	Functional Role of Cardiovascular Exosomes in Myocardial Injury and Atherosclerosis.
Excluded - Review	Matsumoto, J., Stewart, T., et al.	Curr Pharm Des	2017	28914201	The Transport Mechanism of Extracellular Vesicles at the Blood-Brain Barrier
Excluded - Review	Altanerova, U., Jakubechova, J., et al.	Neoplasma	2017	28895404	Exosomes of human mesenchymal stem/stromal/medicinal signaling cells.
Excluded - Review	Lewis, F.C., Kumar, S.D., et al.	Pharmacol Res	2018	28873339	Non-invasive strategies for stimulating endogenous repair and regenerative mechanisms in the damaged heart.
Excluded - Review	Gao, X., Salomon, C., et al.	Front Endocrinol (Lausanne)	2017	28868048	Extracellular Vesicles from Adipose Tissue-A Potential Role in Obesity and Type 2 Diabetes?
Excluded - Review	Abdul Rehman, S., Khurshid, Z., et al.	Proteomes	2017	28783097	Role of Salivary Biomarkers in Detection of Cardiovascular Diseases (CVD)
Excluded - Review	Poe, A.J. and Knowlton, A.A.	J Mol Cell Cardiol	2017	28782514	Exosomes as agents of change in the cardiovascular system.
Excluded - Review	Jia, G., Whaley-Connell, A., et al.	Diabetologia	2018	28776083	Diabetic cardiomyopathy: a hyperglycaemia- and insulin-resistance-induced heart disease.
Excluded - Review	Xu, J.Y., Chen, G.H., et al.	Front Physiol	2017	28751864	Exosomes: A Rising Star in Falling Hearts.
Excluded - Review	Pathan, M., Keerthikumar, S., et al.	J Extracell Vesicles	2017	28717418	A novel community driven software for functional enrichment analysis of extracellular vesicles data.
Excluded - Review	Geldenhuys, W.J., Khayat, M.T., et al.	Res Rev Drug Deliv	2017	28713881	Drug Delivery and Nanoformulations for the Cardiovascular System.
Excluded - Review	Khalyfa, A., Kheirandish-Gozal, L., et al.	Respir Physiol Neurobiol	2018	28676332	Circulating exosomes in obstructive sleep apnea as phenotypic biomarkers and mechanistic messengers of end-organ morbidity.
Excluded - Review	Chen, G.H., Xu, J., et al.	Am J Physiol Heart Circ Physiol	2017	28646026	Exosomes: promising sacks for treating ischemic heart disease?
Excluded - Review	Satthenapalli, V.R., Lamberts, R.R., et al.	Stem Cells	2017	28639375	Concise Review: Challenges in Regenerating the Diabetic Heart: A Comprehensive Review.
Excluded - Review	Rotini, A., Martínez-Sarrà, E., et al.	Pharmacol Res	2018	28629929	Interactions between microRNAs and long non-coding RNAs in cardiac development and repair.
Excluded - Review	Zhao, L., Johnson, T., et al.	Stem Cell Res Ther	2017	28583178	Therapeutic angiogenesis of adipose-derived stem cells for ischemic diseases.
Excluded - Review	Hromada, C., Mühleder, S., et al.	Front Physiol	2017	28529488	Endothelial Extracellular Vesicles-Promises and Challenges.
Excluded - Review	Dykes, I.M.	Cardiol Ther	2017	28526928	Exosomes in Cardiovascular Medicine.
Excluded - Review	Martínez, M.C. and Andriantsitohaina, R.	Circ Res	2017	28495997	Extracellular Vesicles in Metabolic Syndrome.
Excluded - Review	Ochocinska, M.J., Zlokovic, B.V., et al.	Fluids Barriers CNS	2017	28457227	NIH workshop report on the trans-agency blood-brain interface workshop 2016: exploring key challenges and opportunities associated with the blood, brain and their interface.
Excluded - Review	Choi, C.H.J. and Cohen, P.	Exp Cell Res	2017	28433698	Adipose crosstalk with other cell types in health and disease.
Excluded - Review	Fakoya, A.O.	Front Cardiovasc Med	2017	28286751	New Delivery Systems of Stem Cells for Vascular Regeneration in Ischemia.
Excluded - Review	Prattichizzo, F., Micolucci, L., et al.	Mech Ageing Dev	2017	28259747	Exosome-based immunomodulation during aging: A nano-perspective on inflamm-aging.
Excluded - Review	Kumar, S., Vijayan, M., et al.	Prog Mol Biol Transl Sci	2017	28253991	MicroRNAs as Peripheral Biomarkers in Aging and Age-Related Diseases.
Excluded - Review	Khan, M. and Kishore, R.	Methods Mol Biol	2017	28229427	Stem Cell Exosomes: Cell-FreeTherapy for Organ Repair.
Excluded - Review	Duelen, R. and Sampaolesi, M.	EBioMedicine	2017	28169191	Stem Cell Technology in Cardiac Regeneration: A Pluripotent Stem Cell Promise.
Excluded - Review	Yu, H., Lu, K., et al.	Br Med Bull	2017	28164211	Stem cell therapy for ischemic heart diseases.
Excluded - Review	Boulanger, C.M., Loyer, X., et al.	Nat Rev Cardiol	2017	28150804	Extracellular vesicles in coronary artery disease.
Excluded - Review	Juni, R.P., Abreu, R.C., et al.	Noncoding RNA Res	2017	30159420	Regulation of microvascularization in heart failure - an endothelial cell, non-coding RNAs and exosome liaison.
Excluded - Review	Su, S.A., Xie, Y., et al.	Oncotarget	2017	28147325	Emerging role of exosome-mediated intercellular communication in vascular remodeling.
Excluded - Review	Zhang, Y., Hu, Y.W., et al.	DNA Cell Biol	2017	28112546	Characteristics and Roles of Exosomes in Cardiovascular Disease.
Excluded - Review	Jung, J.H., Fu, X., et al.	Circ Res	2017	28104773	Exosomes Generated From iPSC-Derivatives: New Direction for Stem Cell Therapy in Human Heart Diseases.
Excluded - Review	Provost, P.	Clin Chem Lab Med	2017	28099120	The clinical significance of platelet microparticle-associated microRNAs.
Excluded - Review	Gholizadeh, S., Shehata Draz, M., et al.	Biosens Bioelectron	2017	28088752	Microfluidic approaches for isolation, detection, and characterization of extracellular vesicles: Current status and future directions.
Excluded - Review	Garrido, V., Mendoza-Torres, E., et al.	Curr Pharm Des	2017	28079007	Novel Therapies Targeting Cardioprotection and Regeneration.
Excluded - Review	Matthay, M.A., Pati, S., et al.	Stem Cells	2017	27888550	Concise Review: Mesenchymal Stem (Stromal) Cells: Biology and Preclinical Evidence for Therapeutic Potential for Organ Dysfunction Following Trauma or Sepsis.
Excluded - Review	Riazifar, M., Pone, E.J., et al.	Annu Rev Pharmacol Toxicol	2017	27814025	Stem Cell Extracellular Vesicles: Extended Messages of Regeneration.
Excluded - Review	Prathipati, P., Nandi, S.S., et al.	Stem Cell Rev	2017	27807762	Stem Cell-Derived Exosomes, Autophagy, Extracellular Matrix Turnover, and miRNAs in Cardiac Regeneration during Stem Cell Therapy.
Excluded - Review	Davidson, S.M., Takov, K., et al.	Cardiovasc Drugs Ther	2017	27796607	Exosomes and Cardiovascular Protection.
Excluded - Review	Huang, P., Tian, X., et al.	Heart Fail Rev	2016	27459850	New strategies for improving stem cell therapy in ischemic heart disease.
Excluded - Review	Suzuki, E., Fujita, D., et al.	World J Stem Cells	2016	27679686	Stem cell-derived exosomes as a therapeutic tool for cardiovascular disease.
Excluded - Review	Wang, H. and Wang, B.	Biomed Rep	2016	27588172	Extracellular vesicle microRNAs mediate skeletal muscle myogenesis and disease.
Excluded - Review	Nguyen, P.K., Neofytou, E., et al.	JAMA Cardiol	2016	27579998	Potential Strategies to Address the Major Clinical Barriers Facing Stem Cell Regenerative Therapy for Cardiovascular Disease: A Review.
Excluded - Review	Deng, L., Bradshaw, A.C., et al.	Curr Opin Lipidol	2016	27472407	Role of noncoding RNA in vascular remodelling
Excluded - Review	Safari, S., Malekvandfard, F., et al.	Cell Mol Biol (Noisy-le-grand)	2016	27453275	Mesenchymal stem cell-derived exosomes: A novel potential therapeutic avenue for cardiac regeneration.
Excluded - Review	Castrop, H. and Schießl I.M.	Acta Physiol (Oxf)	2017	27452481	Novel routes of albumin passage across the glomerular filtration barrier.
Excluded - Review	Barile, L., Moccetti, T., et al.	Eur Heart J	2017	27443883	Roles of exosomes in cardioprotection.
Excluded - Review	Murach, K.A. and McCarthy, J.J.	Heart Fail Rev	2017	27384434	MicroRNAs, heart failure, and aging: potential interactions with skeletal muscle.
Excluded - Review	Carter, C.J.	Neurochem Int	2016	27296113	The barrier, airway particle clearance, placental and detoxification functions of autism susceptibility genes
Excluded - Review	Kunkel, G.H., Chaturvedi, P., et al.	Heart Fail Rev	2016	27166683	Mitochondrial pathways to cardiac recovery: TFAM.
Excluded - Review	Prattichizzo, F., Giuliani, A., et al.	Diabetes Obes Metab	2016	27161301	Extracellular microRNAs and endothelial hyperglycaemic memory: a therapeutic opportunity?
Excluded - Review	O'Neill, S., Bohl, M., et al.	Trends Endocrinol Metab	2016	27150849	Blood-Based Biomarkers for Metabolic Syndrome.
Excluded - Review	Westermeier, F., Riquelme, J.A., et al.	Front Physiol	2016	27148064	New Molecular Insights of Insulin in Diabetic Cardiomyopathy.
Excluded - Review	Angelini, F., Ionta, V., et al.	Front Biosci (Schol Ed)	2016	27100708	Exosomes isolation protocols: facts and artifacts for cardiac regeneration.
Excluded - Review	Sabapathy, V. and Kumar, S.	J Cell Mol Med	2016	27097531	hiPSC-derived iMSCs: NextGen MSCs as an advanced therapeutically active cell resource for regenerative medicine.
Excluded - Review	Yuan, M.J., Maghsoudi, T., et al.	Int J Med Sci	2016	26941569	Exosomes Mediate the Intercellular Communication after Myocardial Infarction.
Excluded - Review	Kishore, R., Garikipati, V.N., et al.	J Cardiovasc Transl Res	2016	26911150	Tiny Shuttles for Information Transfer: Exosomes in Cardiac Health and Disease.
Excluded - Review	Campbell, C.R., Berman, A.E., et al.	Med Hypotheses	2016	26880625	Electrical stimulation to optimize cardioprotective exosomes from cardiac stem cells.
Excluded - Review	Osteikoetxea, X., Németh, A., et al.	J Physiol	2016	26872404	Extracellular vesicles in cardiovascular disease: are they Jedi or Sith?
Excluded - Review	Kapustin, N.A. and Shanahan, C.M.	J Physiol	2016	26864864	Emerging roles for vascular smooth muscle cell exosomes in calcification and coagulation.
Excluded - Review	Singla, D.K.	Curr Opin Pharmacol	2016	26848944	Stem cells and exosomes in cardiac repair.
Excluded - Review	Kishore, R. and Khan, M.	Circ Res.	2016	26838317	More Than Tiny Sacks: Stem Cell Exosomes as Cell-Free Modality for Cardiac Repair.
Excluded - Review	Bei, Y., Zhou, Q., et al.	Semin Cell Dev Biol	2016	26826525	Telocytes in cardiac regeneration and repair.
Excluded - Review	Krohn, J.B., Hutcheson, J.D., et al.	J Physiol	2016	26824781	Extracellular vesicles in cardiovascular calcification: expanding current paradigms
Excluded - Review	Caporali, A., Miscianinov, V., et al.	Biochim Biophys Acta	2016	26806392	MicroRNA transport in cardiovascular complication of diabetes.
Excluded - Review	Lawson, C., Vicencio, J,M., et al.	J Endocrinol	2016	26743452	Microvesicles and exosomes: new players in metabolic and cardiovascular disease.
Excluded - Review	Chistiakov, D.A., Orekhov, A.N., et al.	Int J Mol Sci	2016	26742038	Cardiac Extracellular Vesicles in Normal and Infarcted Heart.
Excluded - Review	McGinn, C.M., MacDonnell, B.F., et al.	Curr Clin Pharmacol	2016	26725878	Microparticles: A Pivotal Nexus in Vascular Homeostasis and Disease.
Excluded - Review	Salomon, C., Scholz-Romero, K., et al.	Diabetes	2016	26718504	Gestational Diabetes Mellitus Is Associated With Changes in the Concentration and Bioactivity of Placenta-Derived Exosomes in Maternal Circulation Across Gestation.
Excluded - Review	Abdelwahid, E., Kalvelyte, A., et al.	Apoptosis	2016	26687129	Stem cell death and survival in heart regeneration and repair.
Excluded - Review	Ibrahim, A. and Marbán, E.	Annu Rev Physiol	2016	26667071	Exosomes: Fundamental Biology and Roles in Cardiovascular Physiology.
Excluded - Review	Iaconetti, C., Sorrentino, S., et al.	Physiology (Bethesda)	2016	26661525	Exosomal miRNAs in Heart Disease.
Excluded - Review	Milbank, E,, Martinezm M,C., et al.	Pharmacol Ther	2016	26617220	Extracellular vesicles: Pharmacological modulators of the peripheral and central signals governing obesity.
Excluded - Review	Gholamin, S., Pasdar, A., et al.	Curr Pharm Des	2016	26561061	The potential for circulating microRNAs in the diagnosis of myocardial infarction: a novel approach to disease diagnosis and treatment.
Excluded - Review	Pfeifer, P., Werner, N., et al.	Biomed Res Int	2015	26558258	Role and Function of MicroRNAs in Extracellular Vesicles in Cardiovascular Biology.
Excluded - Review	Rosca, A.M., Rayia, D.M., et al.	Curr Stem Cell Res Ther	2017	26496883	Emerging Role of Stem Cells - Derived Exosomes as Valuable Tools for Cardiovascular Therapy.
Excluded - Review	Xitong, D. and Xiaorong. Z.	Gene	2016	26341056	Targeted therapeutic delivery using engineered exosomes and its applications in cardiovascular diseases.
Excluded - Review	Kunkel, G.H., Chaturvedi, P., et al.	Heart Fail Rev	2015	26311463	Resuscitation of a dead cardiomyocyte.
Excluded - Review	Batrakova, E.V. and Kim. M.S.	J Control Release	2015	26241750	Using exosomes, naturally-equipped nanocarriers, for drug delivery.
Excluded - Review	Nouraee, N. and Mowla, S.J.	Front Genet	2015	26175755	miRNA therapeutics in cardiovascular diseases: promises and problems.
Excluded - Review	Belting, M. and Christianson, H.C.	J Intern Med	2015	26153525	Role of exosomes and microvesicles in hypoxia-associated tumour development and cardiovascular disease.
Excluded - Review	Yin, M., Loyer, X., et al.	Eur J Pharmacol	2015	26142082	Extracellular vesicles as new pharmacological targets to treat atherosclerosis.
Excluded - Review	Min, P.K. and Chan, S.Y.	Eur J Clin Invest	2015	26046787	The biology of circulating microRNAs in cardiovascular disease.
Excluded - Review	Wang, J., Chen, J., et al.	J Cell Physiol	2016	26031493	MicroRNA as Biomarkers and Diagnostics
Excluded - Review	De Toro, J., Herschlik, L., et al.	Front Immunol	2015	25999947	Emerging roles of exosomes in normal and pathological conditions: new insights for diagnosis and therapeutic applications.
Excluded - Review	Nazimek, K., Bryniarski, K., et al.	Pol Arch Med Wewn	2015	25978300	Exosomes as mediators of intercellular communication: clinical implications.
Excluded - Review	Das, S. and Halushka, M.K.	Cardiovasc Pathol	2015	25958013	Extracellular vesicle microRNA transfer in cardiovascular disease.
Excluded - Review	Quattrocelli, M. and Sampaolesi, M.	Adv Drug Deliv Rev	2015	25912658	The mesmiRizing complexity of microRNAs for striated muscle tissue engineering.
Excluded - Review	Aharon, A.	Thromb Res	2015	25903528	The role of extracellular vesicles in placental vascular complications.
Excluded - Review	Chistiakov, D.A., Orekhov, A.N., et al.	Cell Mol Life Sci	2015	25894694	Extracellular vesicles and atherosclerotic disease.
Excluded - Review	Emanueli, C., Shearn, A.I., et al.	Vascul Pharmacol	2015	25869502	Exosomes and exosomal miRNAs in cardiovascular protection and repair.
Excluded - Review	Penna, C., Granata, R., et al.	Curr Drug Targets	2015	25751010	Endogenous Cardioprotective Agents: Role in Pre and Postconditioning.
Excluded - Review	Huang, L., Ma, W., et al.	Int J Biol Sci	2015	25632267	Exosomes in mesenchymal stem cells, a new therapeutic strategy for cardiovascular diseases?
Excluded - Review	Aurelian, S.M., Cheţa, D.M., et al.	Rom J Morphol Embryol	2014	25607382	Microvesicles - potential biomarkers for the interrelations atherosclerosis/type 2 diabetes mellitus.
Excluded - Review	Zhao, W., Zheng, X.L., et al.	Heart Fail Rev	2015	25549884	Exosome and its roles in cardiovascular diseases.
Excluded - Review	Ailawadi, S., Wang, X., et al.	Biochim Biophys Acta	2015	25463630	Pathologic function and therapeutic potential of exosomes in cardiovascular disease.
Excluded - Review	Danielson, K.M. and Das, S.	Exosomes Microvesicles	2014	25429310	Extracellular Vesicles in Heart Disease: Excitement for the Future?
Excluded - Review	Gonzalez-Calero, L., Martin-Lorenzo, M., et al.	Front Immunol	2014	25339951	Exosomes: a potential key target in cardio-renal syndrome.
Excluded - Review	Mishra, P.J.	Expert Rev Mol Diagn	2014	25327490	Non-coding RNAs as clinical biomarkers for cancer diagnosis and prognosis.
Excluded - Review	Salomon, C., Yee, S.W., et al.	Biomed Res Int	2014	25302305	The possible role of extravillous trophoblast-derived exosomes on the uterine spiral arterial remodeling under both normal and pathological conditions.
Excluded - Review	Calway, T., Kim, G.H., et al.	J Cardiovasc Pharmacol Ther	2015	25261390	Harnessing the Therapeutic Potential of MicroRNAs for Cardiovascular Disease.
Excluded - Review	Tsao, C.R., Liao, M.F., et al.	Acta Cardiol Sin	2014	27122816	Mesenchymal Stem Cell Derived Exosomes: A New Hope for the Treatment of Cardiovascular Disease?
Excluded - Review	Wu, C. and Arora, P.	Circ Cardiovasc Genet	2014	25140065	MicroRNA passenger strand: orchestral symphony of paracrine signaling.
Excluded - Review	Fleury, A., Martinez, M.C., et al.	Front Immunol	2014	25136343	Extracellular vesicles as therapeutic tools in cardiovascular diseases.
Excluded - Review	Tyagi, S.C. and Joshua, I.G.	Can J Physiol Pharmacol	2014	24959992	Exercise and nutrition in myocardial matrix metabolism, remodeling, regeneration, epigenetics, microcirculation, and muscle.
Excluded - Review	Tsilioni, I., Panagiotidou, S., et al.	Clin Ther	2014	24913029	Exosomes in neurologic and psychiatric disorders.
Excluded - Review	Khalyfa, A. And Gozal, D.	J Transl Med	2014	24912806	Exosomal miRNAs as potential biomarkers of cardiovascular risk in children.
Excluded - Review	Novák, J., Bienertová-Vašků, J., et al.	Mediators Inflamm	2014	24876669	MicroRNAs involved in the lipid metabolism and their possible implications for atherosclerosis development and treatment.
Excluded - Review	Agouni, A., Andriantsitohaina, R., et al.	Curr Vasc Pharmacol	2014	24846237	Microparticles as biomarkers of vascular dysfunction in metabolic syndrome and its individual components.
Excluded - Review	Montañez-Barragán, A., Gómez-Barrera, I., et al.	J Nephrol	2014	24756971	Osteoprotegerin and kidney disease.
Excluded - Review	Indolfi, C. and Curcio, A.	J Clin Invest	2014	24743143	Stargazing microRNA maps a new miR-21 star for cardiac hypertrophy.
Excluded - Review	Aoi, W., and Sakuma, K.	Front Physiol	2014	24596559	Does regulation of skeletal muscle function involve circulating microRNAs?
Excluded - Review	Gaceb, A., Martinez, M.C., et al.	Int J Biochem Cell Biol	2014	24509128	Extracellular vesicles: new players in cardiovascular diseases.
Excluded - Review	Sluijter, J.P., Verhage, V., et al.	Cardiovasc Res	2014	24488559	Microvesicles and exosomes for intracardiac communication.
Excluded - Review	Loyer, X., Vion, A.C., et al.	Circ Res	2014	24436430	Microvesicles as cell-cell messengers in cardiovascular diseases.
Excluded - Review	Sahoo, S. and Losordo, D.W.	Circ Res	2014	24436429	Exosomes and cardiac repair after myocardial infarction.
Excluded - Review	Yellon, D.M. and Davidson, S.M.	Circ Res	2014	24436428	Exosomes: nanoparticles involved in cardioprotection?
Excluded - Review	Waldenström, A. and Ronquist, G.	Circ Res	2014	24436427	Role of exosomes in myocardial remodeling.
Excluded - Review	Katoh, M.	Int J Mol Med	2013	23863927	Therapeutics targeting angiogenesis: genetics and epigenetics, extracellular miRNAs and signaling networks (Review).
Excluded - Review	Hulsmans, M. and Holvoet, P.	Cardiovasc Res	2013	23774505	MicroRNA-containing microvesicles regulating inflammation in association with atherosclerotic disease.
Excluded - Review	Zubiri, I., Vivanco, F., et al.	Methods Mol Biol	2013	23585095	Proteomic analysis of urinary exosomes in cardiovascular and associated kidney diseases by two-dimensional electrophoresis and LC-MS/MS.
Excluded - Review	Barderas, M.G., Vivanco, F., et al.	Methods Mol Biol	2013	23585080	Vascular proteomics.
Excluded - Review	Baer, C., Squadrito, M.L., et al.	Exp Cell Res	2013	23542777	Reciprocal interactions between endothelial cells and macrophages in angiogenic vascular niches.
Excluded - Review	Cosme, J., Liu, P.P., et al.	Proteomics	2013	23526783	The cardiovascular exosome: current perspectives and potential.
Excluded - Review	Rayner, K.J., and Hennessy, E.J.	J Lipid Res	2013	23505318	Extracellular communication via microRNA: lipid particles have a new message.
Excluded - Review	Kim, J.W., Galanzha, E.I., et al.	Mol Pharm	2013	23379366	Nanotheranostics of circulating tumor cells, infections and other pathological features in vivo.
Excluded - Review	Katsuda, T., Kosaka, N., et al.	Proteomics	2013	23335344	The therapeutic potential of mesenchymal stem cell-derived extracellular vesicles.
Excluded - Review	Boon, R.A. and Vickers, K.C.	Arterioscler Thromb Vasc Biol	2013	23325475	Intercellular transport of microRNAs.
Excluded - Review	Lagendijk, A.K., Szabó, A., et al.	Trends Cardiovasc Med	2013	23295082	Hyaluronan: a critical regulator of endothelial-to-mesenchymal transition during cardiac valve formation.
Excluded - Review	Weilner, S., Schraml, E., et al.	Exp Gerontol	2013	23283304	Secretion of microvesicular miRNAs in cellular and organismal aging.
Excluded - Review	Ribeiro, M.F., Zhu, H., et al.	Curr Angiogenes	2013	25374792	Exosomes Function in Pro- and Anti-Angiogenesis.
Excluded - Review	Burger, D., Schock, S., et al.	Clin Sci (Lond)	2013	23249271	Microparticles: biomarkers and beyond.
Excluded - Review	Barile, L., Gherghiceanu, M., et al.	J Biomed Biotechnol	2012	23226938	Ultrastructural evidence of exosome secretion by progenitor cells in adult mouse myocardium and adult human cardiospheres.
Excluded - Review	Felder, R.A., White, M.J., et al.	Curr Opin Nephrol Hypertens	2013	23197156	Diagnostic tools for hypertension and salt sensitivity testing.
Excluded - Review	Sharma, P., Cosme, J., et al.	J Proteomics	2013	23153792	Recent advances in cardiovascular proteomics.
Excluded - Review	Baglio, S.R., Pegtel, D.M., et al.	Front Physiol	2012	22973239	Mesenchymal stem cell secreted vesicles provide novel opportunities in (stem) cell-free therapy.
Excluded - Review	O'Loughlin, A.J., Woffindale, C.A., et al.	Curr Gene Ther	2012	22856601	Exosomes and the emerging field of exosome-based gene therapy.
Excluded - Review	van der Pol, E., Böing, A.N., et al.	Pharmacol Rev	2012	22722893	Classification, functions, and clinical relevance of extracellular vesicles.
Excluded - Review	Mikaelian, I., Scicchitano, M., et al.	Toxicol Pathol	2013	22659243	Frontiers in preclinical safety biomarkers: microRNAs and messenger RNAs.
Excluded - Review	Clifton, V.L., Stark, M.J., et al.	Placenta	2012	22118870	Review: The feto-placental unit, pregnancy pathology and impact on long term maternal health.
Excluded - Review	Zhu, H. and Fan, G.C.	Am J Cardiovasc Dis	2011	22059153	Extracellular/circulating microRNAs and their potential role in cardiovascular disease.
Excluded - Review	Lakhal, S. and Wood, M.J.	Bioessays	2011	21932222	Exosome nanotechnology: an emerging paradigm shift in drug delivery: exploitation of exosome nanovesicles for systemic in vivo delivery of RNAi heralds new horizons for drug delivery across biological barriers.
Excluded - Review	Lai, R.C., Chen, T.S., et al.	Regen Med	2011	21749206	Mesenchymal stem cell exosome: a novel stem cell-based therapy for cardiovascular disease.
Excluded - Review	Dignat-George, F. and Boulanger, C.M.	Arterioscler Thromb Vasc Biol	2011	21160065	The many faces of endothelial microparticles.
Excluded - Review	Camussi, G., Deregibus, M.C., et al.	Kidney Int	2010	20703216	Exosomes/microvesicles as a mechanism of cell-to-cell communication.
Excluded - Review	Re, R.N. and Cook, J.L.	Am J Physiol Heart Circ Physiol	2009	19592610	Senescence, apoptosis, and stem cell biology: the rationale for an expanded view of intracrine action.
Excluded - Review	Burnier, L., Fontana, P., et al.	Thromb Haemost	2009	19277403	Cell-derived microparticles in haemostasis and vascular medicine.
Excluded - Review	Alvarez-Llamas, G., de la Cuesta, F., et al.	Expert Rev Proteomics	2008	18937558	Recent advances in atherosclerosis-based proteomics: new biomarkers and a future perspective.
Excluded - Review	Azevedo, L.C, Pedro, M.A., et al.	Recent Pat Cardiovasc Drug Discov	2007	18221102	Circulating microparticles as therapeutic targets in cardiovascular diseases.
Excluded - Review	Toth, B., Lok, C.A., et al.	Am J Reprod Immunol	2007	17922691	Microparticles and exosomes: impact on normal and complicated pregnancy.
Excluded - Review	Horstman, L.L., Jy, W., et al.	Int Rev Neurobiol	2007	17531844	Cell-derived microparticles and exosomes in neuroinflammatory disorders.
Excluded - Off-topic	Shearn, A.I.U., Aday, S., et al.	Front Cell Dev Biol	2020	32528952	Analysis of Neat Biofluids Obtained During Cardiac Surgery Using Nanoparticle Tracking Analysis: Methodological Considerations
Excluded - Off-topic	Zhu, G., Yang, X., et al.	Exp Cell Res	2020	32464126	Exosomal miR-532-5p from bone marrow mesenchymal stem cells reduce intervertebral disc degeneration by targeting RASSF5
Excluded - Off-topic	Liang, W., Sun, F., et al.	J Diabetes Res	2020	32455133	Identification of Susceptibility Modules and Genes for Cardiovascular Disease in Diabetic Patients Using WGCNA Analysis
Excluded - Off-topic	Jiang, T., Wang, Z., et al.	Stem Cell Res Ther	2020	32448395	Human bone marrow mesenchymal stem cell-derived exosomes stimulate cutaneous wound healing mediates through TGF-Î²/Smad signaling pathway
Excluded - Off-topic	Weber, A., Liu, S.S., et al.	Biomed Res Int	2020	32382562	The Course of Circulating Small Extracellular Vesicles in Patients Undergoing Surgical Aortic Valve Replacement
Excluded - Off-topic	Huang, W., Yan, Y., et al.	Signal Transduct Target Ther	2020	32317629	Exosomes with low miR-34c-3p expression promote invasion and migration of non-small cell lung cancer by upregulating integrin Î±2Î²1
Excluded - Off-topic	Pasta, S., Agnese, V., et al.	Ann Thorac Surg	2020	32289298	Shear Stress and Aortic Strain Associations With Biomarkers of Ascending Thoracic Aortic Aneurysm
Excluded - Off-topic	Shin, H., Oh, S., et al.	ACS Nano	2020	32286793	Early-Stage Lung Cancer Diagnosis by Deep Learning-Based Spectroscopic Analysis of Circulating Exosomes
Excluded - Off-topic	Han, J., Zhang, L., et al.	Front Genet	2020	32211036	Circular RNA-Expression Profiling Reveals a Potential Role of Hsa_circ_0097435 in Heart Failure via Sponging Multiple MicroRNAs
Excluded - Off-topic	Song, Y., Li, H., et al.	Eur J Pharmacol	2020	32007500	SNHG9, delivered by adipocyte-derived exosomes, alleviates inflammation and apoptosis of endothelial cells through suppressing TRADD expression
Excluded - Off-topic	Kim, D.H., Park, S., et al.	Cancer Lett	2020	32004570	Tumor-derived exosomal miR-619-5p promotes tumor angiogenesis and metastasis through the inhibition of RCAN1.4
Excluded - Off-topic	Jones, L.B., Kumar, S.,et al.	Pathogens	2019	31847332	Effects of Pseudomonas aeruginosa on Microglial-Derived Extracellular Vesicle Biogenesis and Composition
Excluded - Off-topic	Zhang, L., Liu, H., et al.	Oxid Med Cell Longev	2019	31814872	Exosomes Mediate Hippocampal and Cortical Neuronal Injury Induced by Hepatic Ischemia-Reperfusion Injury through Activating Pyroptosis in Rats
Excluded - Off-topic	Williams, A.M., Bhatti, U.F., et al.	J Trauma Acute Care Surg	2020	31804413	Early single-dose treatment with exosomes provides neuroprotection and improves blood-brain barrier integrity in swine model of traumatic brain injury and hemorrhagic shock
Excluded - Off-topic	Luo, Y., Huang, L., et al.	Biol Open	2019	31784421	Genomic analysis of lncRNA and mRNA profiles in circulating exosomes of patients with rheumatic heart disease
Excluded - Off-topic	Zhao, L., Ma, Z., et al.	Biomed Pharmacother	2020	31731197	Analysis of long non-coding RNA and mRNA profiles in epicardial adipose tissue of patients with atrial fibrillation
Excluded - Off-topic	Denver, P., D'Adamo, H., et al.	Front Physiol	2019	31708792	A Novel Model of Mixed Vascular Dementia Incorporating Hypertension in a Rat Model of Alzheimer's Disease
Excluded - Off-topic	Khalyfa, A., Gozal, D., et al.	Eur Respir J	2020	31672757	Circulating plasma exosomes in obstructive sleep apnoea and reverse dipping blood pressure
Excluded - Off-topic	Hsu, H.H., Kuo, W.W., et al.	Cancers (Basel)	2019	31623173	FOXC1 Regulation of miR-31-5p Confers Oxaliplatin Resistance by Targeting LATS2 in Colorectal Cancer
Excluded - Off-topic	Ciceri, P., Falleni, M., et al.	Int J Cardiol	2019	31619363	High-phosphate induced vascular calcification is reduced by iron citrate through inhibition of extracellular matrix osteo-chondrogenic shift in VSMCs
Excluded - Off-topic	Zare, N., Haghjooy Javanmard, S.H., et al.	Cell J	2020	31606965	Effect of Plasma-Derived Exosomes of Refractory/Relapsed or Responsive Patients with Diffuse Large B-Cell Lymphoma on Natural Killer Cells Functions
Excluded - Off-topic	Zachar, R., Jensen, B.L., et al.	Am J Physiol Renal Physiol	2019	31566425	Dietary Na(+) intake in healthy humans changes the urine extracellular vesicle prostasin abundance while the vesicle excretion rate, NCC, and ENaC are not altered
Excluded - Off-topic	Mol, E.A., Lei, Z., et al.	Adv Healthc Mater	2019	31559704	Injectable Supramolecular Ureidopyrimidinone Hydrogels Provide Sustained Release of Extracellular Vesicle Therapeutics
Excluded - Off-topic	Pataer, A., Ozpolat, B., et al.	Oncogene	2020	31554935	Therapeutic targeting of the PI4K2A/PKR lysosome network is critical for misfolded protein clearance and survival in cancer cells
Excluded - Off-topic	Le Goff, M., Lagadic-Gossmann, D., et al.	Environ Pollut	2019	31539851	PAHs increase the production of extracellular vesicles both inÂ vitro in endothelial cells and inÂ vivo in urines from rats
Excluded - Off-topic	Mills, J.T., Schwenzer, A., et al.	Front Immunol	2019	31497021	Airway Epithelial Cells Generate Pro-inflammatory Tenascin-C and Small Extracellular Vesicles in Response to TLR3 Stimuli and Rhinovirus Infection
Excluded - Off-topic	Xu, J., Wang, Y., et al.	Elife	2019	31482845	Human perivascular stem cell-derived extracellular vesicles mediate bone repair
Excluded - Off-topic	Yi, M., Wu, Y., et al.	Am J Physiol Cell Physiol	2019	31411920	Exosomes secreted from osteocalcin-overexpressing endothelial progenitor cells promote endothelial cell angiogenesis
Excluded - Off-topic	Kim, D.H., Kim, H., et al.	Exp Mol Med	2019	31399559	Exosomal PD-L1 promotes tumor growth through immune escape in non-small cell lung cancer
Excluded - Off-topic	Pérez-González, R., Sahoo, S., et al.	Sci Rep	2019	31367000	Neuroprotection mediated by cystatin C-loaded extracellular vesicles
Excluded - Off-topic	Kim, H., Kang, J.Y., et al.	PLoS One	2019	31329632	Calcium chloride enhances the delivery of exosomes
Excluded - Off-topic	Jiang, K., Karasawa, R., et al.	Pediatr Rheumatol Online J	2019	31299993	Plasma exosomes from children with juvenile dermatomyositis are taken up by human aortic endothelial cells and are associated with altered gene expression in those cells
Excluded - Off-topic	Cheng, H., Fang, H., et al.	Eur Rev Med Pharmacol Sci	2019	31298362	Development of a rinsing separation method for exosome isolation and comparison to conventional methods
Excluded - Off-topic	Zeng, Y., Yao, X., et al.	J Extracell Vesicles	2019	31258881	Anti-angiogenesis triggers exosomes release from endothelial cells to promote tumor vasculogenesis
Excluded - Off-topic	Li, Z., Wu, J., et al.	Front Physiol	2019	31231239	Association of Serum miR-186-5p With the Prognosis of Acute Coronary Syndrome Patients After Percutaneous Coronary Intervention
Excluded - Off-topic	Mantilla-Escalante, D.C., López de Las Hazas, M.C., et al.	Nutrients	2019	31200481	Postprandial Circulating miRNAs in Response to a Dietary Fat Challenge
Excluded - Off-topic	Ortega, F.G., Roefs, M.T., et al.	Nanomedicine	2019	31152797	Interfering with endolysosomal trafficking enhances release of bioactive exosomes
Excluded - Off-topic	Weber, N.C., Schilling, J.M., et al.	Int J Mol Sci	2019	31146391	Helium-Induced Changes in Circulating Caveolin in Mice Suggest a Novel Mechanism of Cardiac Protection
Excluded - Off-topic	Mostovenko, E., Young, T., et al.	Part Fibre Toxicol	2019	31142334	Nanoparticle exposure driven circulating bioactive peptidome causes systemic inflammation and vascular dysfunction
Excluded - Off-topic	Garcia, N.A., González-King, H., et al.	PLoS One	2019	31141569	Circulating exosomes deliver free fatty acids from the bloodstream to cardiac cells: Possible role of CD36
Excluded - Off-topic	Ge, T., Ye, Y., et al.	Eur J Histochem	2019	31122004	Ultrastructure of telocytes, a new type of interstitial cells in the myocardium of the Chinese giant salamander (Andrias davidianus)
Excluded - Off-topic	Riazifar, M., Mohammadi, M.R., et al.	ACS Nano	2019	31117376	Stem Cell-Derived Exosomes as Nanotherapeutics for Autoimmune and Neurodegenerative Disorders
Excluded - Off-topic	Wang, Z.F., Liao, F., et al.	J Exp Clin Cancer Res	2019	31101062	Glioma stem cells-derived exosomal miR-26a promotes angiogenesis of microvessel endothelial cells in glioma
Excluded - Off-topic	Cui, Y.H., Liu, Q., et al.	Exp Eye Res	2019	31085182	Quantitative proteomic analysis of human corneal epithelial cells infected with HSV-1
Excluded - Off-topic	Soltész, B., Urbancsek, R., et al.	J Biotechnol	2019	31063814	Quantification of peripheral whole blood, cell-free plasma and exosome encapsulated mitochondrial DNA copy numbers in patients with atrial fibrillation
Excluded - Off-topic	Marazioti, A., Papadia, K., et al.	J Pharmacol Exp Ther	2019	31061141	Cellular Vesicles: New Insights in Engineering Methods, Interaction with Cells and Potential for Brain Targeting
Excluded - Off-topic	Spannbauer, A., Traxler, D., et al.	Int J Mol Sci	2019	31052231	Effect of Ischemic Preconditioning and Postconditioning on Exosome-Rich Fraction microRNA Levels, in Relation with Electrophysiological Parameters and Ventricular Arrhythmia in Experimental Closed-Chest Reperfused Myocardial Infarction
Excluded - Off-topic	Paiva, J.S., Jorge, P.A.S., et al.	Int J Nanomedicine	2019	31040661	Optical fiber-based sensing method for nanoparticle detection through supervised back-scattering analysis: a potential contributor for biomedicine
Excluded - Off-topic	Wu, X.G., Zhou, C.F., et al.	Angiogenesis	2019	30993566	Cancer-derived exosomal miR-221-3p promotes angiogenesis by targeting THBS2 in cervical squamous cell carcinoma
Excluded - Off-topic	Zare, N., Eskandari, N., et al.	J Res Med Sci	2019	30988678	The expression level of hsa-miR-146a-5p in plasma-derived exosomes of patients with diffuse large B-cell lymphoma
Excluded - Off-topic	Chen, L.C., Shibu, M.A., et al.	Chem Biol Interact	2019	30980805	ERK1/2 mediates the lipopolysaccharide-induced upregulation of FGF-2, uPA, MMP-2, MMP-9 and cellular migration in cardiac fibroblasts
Excluded - Off-topic	Ou, H.C., Pandey, S., et al.	Am J Chin Med	2019	30966772	Luteolin: A Natural Flavonoid Enhances the Survival of HUVECs against Oxidative Stress by Modulating AMPK/PKC Pathway
Excluded - Off-topic	Zhao, Q., Yang, J., et al.	Mol Med Rep	2019	30957183	Exosomes derived from mangiferinâ€‘stimulated perivascular adipose tissue ameliorate endothelial dysfunction
Excluded - Off-topic	Zhang, Q., Higginbotham, J.N., et al.	Cell Rep	2019	30956133	Transfer of Functional Cargo in Exomeres
Excluded - Off-topic	Murillo, O.D., Thistlethwaite, W., et al.	Cell	2019	30951672	exRNA Atlas Analysis Reveals Distinct Extracellular RNA Cargo Types and Their Carriers Present across Human Biofluids
Excluded - Off-topic	Görgens, A., Bremer, M., et al.	J Extracell Vesicles	2019	30949308	Optimisation of imaging flow cytometry for the analysis of single extracellular vesicles by using fluorescence-tagged vesicles as biological reference material
Excluded - Off-topic	Sun, R., Liu, Y., et al.	J Mol Med (Berl)	2019	30944935	ALIX increases protein content and protective function of iPSC-derived exosomes
Excluded - Off-topic	Rogers, R.G., Fournier, M., et al.	JCI Insight	2019	30944252	Disease-modifying bioactivity of intravenous cardiosphere-derived cells and exosomes in mdx mice
Excluded - Off-topic	Ithier, M.C., Parobchak, N., et al.	Sci Rep	2019	30940885	Fetal lung C4BPA induces p100 processing in human placenta
Excluded - Off-topic	Bai, L., Liu, Y., et al.	ACS Appl Mater Interfaces	2019	30900870	Ultrasound Facilitates Naturally Equipped Exosomes Derived from Macrophages and Blood Serum for Orthotopic Glioma Treatment
Excluded - Off-topic	Xu, F., Xiang, Q., et al.	Stem Cell Res Ther	2019	30898155	Exosomal miR-423-5p mediates the proangiogenic activity of human adipose-derived stem cells by targeting Sufu.
Excluded - Off-topic	Chen, S.Y., Lin, M.C., et al.	Stem Cells Transl Med	2019	30891948	EP(4) Antagonist-Elicited Extracellular Vesicles from Mesenchymal Stem Cells Rescue Cognition/Learning Deficiencies by Restoring Brain Cellular Functions
Excluded - Off-topic	Han, C., Zhou, J., et al.	Mater Sci Eng C Mater Biol Appl	2019	30889706	Delivery of miR-675 by stem cell-derived exosomes encapsulated in silk fibroin hydrogel prevents aging-induced vascular dysfunction in mouse hindlimb.
Excluded - Off-topic	Royce, S.G., Patel, K.P., et al.	Br J Pharmacol	2019	30883698	Serelaxin enhances the therapeutic effects of human amnion epithelial cell-derived exosomes in experimental models of lung disease.
Excluded - Off-topic	Wu, F., Li, F., et al.	Endocr Relat Cancer	2019	30870812	Exosomes increased angiogenesis in papillary thyroid cancer microenvironment.
Excluded - Off-topic	Gajos-Michniewicz, A. and Czyz, M.	Cancers (Basel).	2019	30866509	Role of miRNAs in Melanoma Metastasis.
Excluded - Off-topic	Benedikter, B.J., Bouwman, F.G., et al.	J Extracell Vesicles	2019	30863515	Proteomic analysis reveals procoagulant properties of cigarette smoke-induced extracellular vesicles.
Excluded - Off-topic	Guo, Y., Bao, S., et al.	Funct Integr Genomics	2019	30850904	Bone marrow mesenchymal stem cell-derived exosomes alleviate high phosphorus-induced vascular smooth muscle cells calcification by modifying microRNA profiles.
Excluded - Off-topic	Zheng, Y. , He, R., et al.	Biomater Sci	2019	30843911	Exosomes from LPS-stimulated macrophages induce neuroprotection and functional improvement after ischemic stroke by modulating microglial polarization
Excluded - Off-topic	Pan, T., Jia, P., et al.	Theranostics	2019	30809283	Delayed Remote Ischemic Preconditioning ConfersRenoprotection against Septic Acute Kidney Injury via Exosomal miR-21.
Excluded - Off-topic	Korutla, L., Rickels, M,R., et al.	Am J Transplant	2019	30801971	Noninvasive diagnosis of recurrent autoimmune type 1 diabetes after islet cell transplantation.
Excluded - Off-topic	Chen, X., Yang, F., et al.	J Exp Clin Cancer Res	2019	30795814	MiR-9 promotes tumorigenesis and angiogenesis and is activated by MYC and OCT4 in human glioma
Excluded - Off-topic	Zare, N., Haghjooy Javanmard, S., et al.	Leuk Lymphoma	2019	30714442	Evaluation of exosomal miR-155, let-7g and let-7i levels as a potential noninvasive biomarker among refractory/relapsed patients, responsive patients and patients receiving R-CHOP.
Excluded - Off-topic	Kinjyo, I., Bragin, D.,et al.	J Leukoc Biol	2019	30702754	Leukemia-derived exosomes and cytokines pave the way for entry into the brain
Excluded - Off-topic	Siwaponanan, P., Keawvichit, R., et al.	Clin Cardiol	2019	30680757	Altered profile of circulating microparticles in nonvalvular atrial fibrillation
Excluded - Off-topic	Takov, K., Yellon, D.M., et al.	J Extracell Vesicles	2018	30651940	Comparison of small extracellular vesicles isolated from plasma by ultracentrifugation or size-exclusion chromatography: yield, purity and functional potential.
Excluded - Off-topic	Kulkarni, H.S., Diamond, J.M., et al.	J Heart Lung Transplant	2019	30642798	Exosomal profiling in cardiac allograft rejection: Best basic science article in 2018
Excluded - Off-topic	Khayrullin, A., Krishnan, P., et al.	Cells	2019	30634626	Very Long-Chain C24:1 Ceramide Is Increased in Serum Extracellular Vesicles with Aging and Can Induce Senescence in Bone-Derived Mesenchymal Stem Cells.
Excluded - Off-topic	Burek, M., König, A., et al.	Transl Stroke Res	2019	30617994	Hypoxia-Induced MicroRNA-212/132 Alter Blood-Brain Barrier Integrity Through Inhibition of Tight Junction-Associated Proteins in Human and Mouse Brain Microvascular Endothelial Cells
Excluded - Off-topic	Trac, D., Maxwell, J.T., et al.	Circ Res	2019	30590978	Aggregation of Child Cardiac Progenitor Cells Into Spheres Activates Notch Signaling and Improves Treatment of Right Ventricular Heart Failure
Excluded - Off-topic	Akerman, A.W., Blanding, W.M., et al.	J Am Heart Assoc	2019	30572760	Elevated Wall Tension Leads to Reduced miR-133a in the Thoracic Aorta by Exosome Release
Excluded - Off-topic	Kawamura, S., Iinuma, H., et al.	J Hepatobiliary Pancreat Sci	2019	30561106	Exosome-encapsulated microRNA-4525, microRNA-451a and microRNA-21 in portal vein blood is a high-sensitive liquid biomarker for the selection of high-risk pancreatic ductal adenocarcinoma patients
Excluded - Off-topic	Li, X., Li, X., et al.	J Ultrasound Med	2019	30561085	Exosomes Derived From Low-Intensity Pulsed Ultrasound-Treated Dendritic Cells Suppress Tumor Necrosis Factor-Induced Endothelial Inflammation
Excluded - Off-topic	Chang, Y.M., Asokan Shibu, M., et al.	J Cell Physiol	2019	30515824	Alpinate Oxyphyllae extracts enhance the longevity and homing of mesenchymal stem cells and augment their protection against senescence in H9c2 cells
Excluded - Off-topic	Shanbhogue, P. and Hannun, Y.A.	Handb Exp Pharmacol	2018	30478737	Exploring the Therapeutic Landscape of Sphingomyelinases.
Excluded - Off-topic	Macchi, C., Ferri, N., et al.	Eur J Prev Cardiol	2019	30477320	Long-term exposure to air pollution raises circulating levels of proprotein convertase subtilisin/kexin type 9 in obese individuals.
Excluded - Off-topic	Kuroda, H., Tachikawa, M., et al.	Mol Pharm	2019	30452273	Cluster of Differentiation 46 Is the Major Receptor in Human Blood-Brain Barrier Endothelial Cells for Uptake of Exosomes Derived from Brain-Metastatic Melanoma Cells (SK-Mel-28)
Excluded - Off-topic	Huang, W.T., Chong, I.W., et al.	Cancer Lett	2019	30439539	Pigment epithelium-derived factor inhibits lung cancer migration and invasion by upregulating exosomal thrombospondin 1.
Excluded - Off-topic	Yang, Y.N., Zhang, R., et al.	Cancer Cell Int	2018	30377411	Predictive role of UCA1-containing exosomes in cetuximab-resistant colorectal cancer.
Excluded - Off-topic	Sun, I.O., Santelli, A., et al.	Hypertension	2018	30354805	Loss of Renal Peritubular Capillaries in Hypertensive Patients Is Detectable by Urinary Endothelial Microparticle Levels
Excluded - Off-topic	Banizs, A.B., Huang, T., et al.	Mol Pharm	2018	30351959	Endocytosis Pathways of Endothelial Cell Derived Exosomes
Excluded - Off-topic	Lee, Y.R., Kim, G., et al.	Int J Cancer	2019	30338850	Circulating exosomal noncoding RNAs as prognostic biomarkers in human hepatocellular carcinoma
Excluded - Off-topic	Shyu, K.G., Wang, B.W., et al.	Int J Cardio	2019	30301563	Hyperbaric oxygen boosts long noncoding RNA MALAT1 exosome secretion to suppress microRNA-92a expression in therapeutic angiogenesis
Excluded - Off-topic	Crewe, C., Joffin, N., et al.	Cell	2018	30293865	An Endothelial-to-Adipocyte Extracellular Vesicle Axis Governed by Metabolic State.
Excluded - Off-topic	Kuravi, S.J., Harrison, P., et al.	Inflammation	2019	30218321	Ability of Platelet-Derived Extracellular Vesicles to Promote Neutrophil-Endothelial Cell Interactions.
Excluded - Off-topic	Rodosthenous, R.S., Kloog, I., et al.	Environ Res	2018	30216846	Extracellular vesicle-enriched microRNAs interact in the association between long-term particulate matter and blood pressure in elderly men.
Excluded - Off-topic	Ishii, T., Warabi, E., et al.	Free Radic Biol Med	2019	30189266	Circadian control of BDNF-mediated Nrf2 activation in astrocytes protects dopaminergic neurons from ferroptosis.
Excluded - Off-topic	Xu, Z.H., Miao, Z.W., et al.	FASEB J	2019	30183374	Brain microvascular endothelial cell exosome-mediated S100A16 up-regulation confers small-cell lung cancer cell survival in brain
Excluded - Off-topic	Santasusagna, S., Moreno, I., et al.	Oncology	2018	30138915	Prognostic Impact of miR-200 Family Members in Plasma and Exosomes from Tumor-Draining versus Peripheral Veins of Colon Cancer Patients.
Excluded - Off-topic	Zhang, K., Zhao, X., et al.	ACS Appl Mater Interfaces	2018	30118197	Enhanced Therapeutic Effects of Mesenchymal Stem Cell-Derived Exosomes with an Injectable Hydrogel for Hindlimb Ischemia Treatment.
Excluded - Off-topic	Huang, C.Y., Lai, C.H., et al.	J Mol Cell Cardiol. 2018 Sep	2018	30098987	Inhibition of ERK-Drp1 signaling and mitochondria fragmentation alleviates IGF-IIR-induced mitochondria dysfunction during heart failure
Excluded - Off-topic	Song, M., Han, L., et al.	Cell Physiol Biochem	2018	30064125	Adipocyte-Derived Exosomes Carrying Sonic Hedgehog Mediate M1 Macrophage Polarization-Induced Insulin Resistance via Ptch and PI3K Pathways.
Excluded - Off-topic	Monypenny, J., Milewicz, H., et al.	Cell Rep	2018	30021161	ALIX Regulates Tumor-Mediated Immunosuppression by Controlling EGFR Activity and PD-L1 Presentation.
Excluded - Off-topic	Torralba, D., Baixauli, F., et al.	Nat Commun	2018	29985392	Priming of dendritic cells by DNA-containing extracellular vesicles from activated T cells through antigen-driven contacts
Excluded - Off-topic	Mao, L., Li, X., et al.	Cancer Gene Ther	2018	29983418	Serum exosomes contain ECRG4 mRNA that suppresses tumor growth via inhibition of genes involved in inflammation, cell proliferation, and angiogenesis.
Excluded - Off-topic	Ciccocioppo, R., Panelli, S., et al.	Front Med (Lausanne)	2018	29971234	The Transcriptomic Analysis of Circulating Immune Cells in a Celiac Family Unveils Further Insights Into Disease Pathogenesis.
Excluded - Off-topic	Kang, K.W., Jung, J.H., et al.	Anticancer Res	2018	29970515	The Potential of Exosomes Derived from Chronic Myelogenous Leukaemia Cells as a Biomarker.
Excluded - Off-topic	Zhang, H., Liu, J., et al.	Proc Natl Acad Sci U S A	2018	29967177	Serum exosomes mediate delivery of arginase 1 as a novel mechanism for endothelial dysfunction in diabetes.
Excluded - Off-topic	Samokhin, A.O., Stephens, T., et al.	Sci Transl Med	2018	29899023	NEDD9 targets COL3A1 to promote endothelial fibrosis and pulmonary arterial hypertension
Excluded - Off-topic	Sáez, T., de Vos, P., et al.	Placenta	2018	29884299	Fetoplacental endothelial exosomes modulate high d-glucose-induced endothelial dysfunction
Excluded - Off-topic	Gao, W., Li, F., et al.	Exp Neurol	2018	29883579	Endothelial colony-forming cell-derived exosomes restore blood-brain barrier continuity in mice subjected to traumatic brain injury.
Excluded - Off-topic	Huang, C., Fisher, K,P., et al.	Diabetes	2018	29866771	Plasma Exosomes Contribute to Microvascular Damage in Diabetic Retinopathy by Activating the Classical Complement Pathway.
Excluded - Off-topic	Kim, T.W., Lee, S.Y., et al.	Cell Death Dis	2018	29844404	DSGOST regulates resistance via activation of autophagy in gastric cancer.
Excluded - Off-topic	Zhao, C., Wang, H., et al.	Biochem Biophys Res Commun	2018	29787762	Hypoxic glioblastoma release exosomal VEGF-A induce the permeability of blood-brain barrier.
Excluded - Off-topic	Hill, D.A., Lim, H.W., et al.	Proc Natl Acad Sci U S A	2018	29760084	Distinct macrophage populations direct inflammatory versus physiological changes in adipose tissue.
Excluded - Off-topic	Ning, X., Zhang, H., et al.	Med Sci Monit	2018	29668670	Exosomes Released by Gastric Cancer Cells Induce Transition of Pericytes Into Cancer-Associated Fibroblasts.
Excluded - Off-topic	Xie, W., Melzig, M.F., et al.	Molecules	2018	29659501	The Stability of Medicinal Plant microRNAs in the Herb Preparation Process.
Excluded - Off-topic	Guix, F.X., Corbett, G.T., et al.	Int J Mol Sci	2018	29495441	Detection of Aggregation-Competent Tau in Neuron-Derived Extracellular Vesicles.
Excluded - Off-topic	Ong, S.G., Lee, W.H., et al.	Methods Mol Biol	2018	29435928	Mining Exosomal MicroRNAs from Human-Induced Pluripotent Stem Cells-Derived Cardiomyocytes for Cardiac Regeneration.
Excluded - Off-topic	Hervera, A., De Virgiliis, F., et al.	Nat Cell Biol	2018	29434374	Reactive oxygen species regulate axonal regeneration through the release of exosomal NADPH oxidase 2 complexes into injured axons.
Excluded - Off-topic	Dusso, A., Colombo, M.I., et al.	Kidney Int	2018	29389393	Not all vascular smooth muscle cell exosomes calcify equally in chronic kidney disease.
Excluded - Off-topic	O'Brien, K.P., Khan, S., et al.	Oncogene	2018	29367765	Employing mesenchymal stem cells to support tumor-targeted delivery of extracellular vesicle (EV)-encapsulated microRNA-379
Excluded - Off-topic	Hinrichs, G.R., Michelsen, J.S., et al.	Am J Physiol Renal Physiol	2018	29363322	Albuminuria in kidney transplant recipients is associated with increased urinary serine proteases and activation of the epithelial sodium channel.
Excluded - Off-topic	Gao, L., Wang, L., et al.	Nat Immunol	2018	29358709	Tumor-derived exosomes antagonize innate antiviral immunity.
Excluded - Off-topic	Stranska, R., Gysbrechts, L., et al.	J Transl Med	2018	29316942	Comparison of membrane affinity-based method with size-exclusion chromatography for isolation of exosome-like vesicles from human plasma.
Excluded - Off-topic	Zhou, W., Woodson, M., et al.	PLoS Pathog	2018	29300779	Exosomes serve as novel modes of tick-borne flavivirus transmission from arthropod to human cells and facilitates dissemination of viral RNA and proteins to the vertebrate neuronal cells.
Excluded - Off-topic	Tanaka, M., Ishikawa, S., et al.	Oncotarget	2017	29245923	EVI1 modulates oncogenic role of GPC1 in pancreatic carcinogenesis.
Excluded - Off-topic	Khan, F.M., Saleh, E., et al.	Cancer Biol Ther	2018	29244610	Inhibition of exosome release by ketotifen enhances sensitivity of cancer cells to doxorubicin.
Excluded - Off-topic	Yan, S., Jiang, Y., et al.	J Cell Biochem	2018	29240249	Exosomal miR-6803-5p as potential diagnostic and prognostic marker in colorectal cancer.
Excluded - Off-topic	Svennerholm, K., Park, K.S., et al.	Sci Rep	2017	29234030	Escherichia coli outer membrane vesicles can contribute to sepsis induced cardiac dysfunction
Excluded - Off-topic	Chen, W., Yang, M., et al.	Macromol Biosci	2018	29205878	Exosome-Modified Tissue Engineered Blood Vessel for Endothelial Progenitor Cell Capture and Targeted siRNA Delivery.
Excluded - Off-topic	Takov, K., Yellon, D.M., et al.	J Extracell Vesicles	2017	29184625	Confounding factors in vesicle uptake studies using fluorescent lipophilic membrane dyes.
Excluded - Off-topic	Yamamoto, S., Kaimori, J.Y., et al.	Nephrol Dial Transplant	2017	29156055	Analysis of an ADTKD family with a novel frameshift mutation in MUC1 reveals characteristic features of mutant MUC1 protein.
Excluded - Off-topic	Sáez, T., Salsoso, R., et al.	Biochim Biophys Acta Mol Basis Dis	2018	29155213	Human umbilical vein endothelium-derived exosomes play a role in foetoplacental endothelial dysfunction in gestational diabetes mellitus.
Excluded - Off-topic	Zhang, Y.Z., Liu, F., et al.	Biochem Biophys Res Commun	2018	29154990	Exosomes derived from human umbilical vein endothelial cells promote neural stem cell expansion while maintain their stemness in culture.
Excluded - Off-topic	Thrush, A.B., Antoun, G., et al.	Int J Obes (Lond)	2018	29151592	Diet-resistant obesity is characterized by a distinct plasma proteomic signature and impaired muscle fiber metabolism.
Excluded - Off-topic	Yang, Q., Nanayakkara, G.K., et al.	Front Physiol	2017	29109687	Low-Intensity Ultrasound-Induced Anti-inflammatory Effects Are Mediated by Several New Mechanisms Including Gene Induction, Immunosuppressor Cell Promotion, and Enhancement of Exosome Biogenesis and Docking.
Excluded - Off-topic	Goh, W.J., Zou, S., et al.	Sci Rep	2017	29085024	Bioinspired Cell-Derived Nanovesicles versus Exosomes as Drug Delivery Systems: a Cost-Effective Alternative.
Excluded - Off-topic	Willis, G.R., Kourembanas, S., et al.	Front Cardiovasc Med	2017	29062835	Toward Exosome-Based Therapeutics: Isolation, Heterogeneity, and Fit-for-Purpose Potency.
Excluded - Off-topic	Berrout, J., Kyriakopoulou, E., et al.	Nat Commun	2017	29038531	TRPA1-FGFR2 binding event is a regulatory oncogenic driver modulated by miRNA-142-3p.
Excluded - Off-topic	Sin, J., McIntyre, L., et al.	J Virol	2017	28978702	Coxsackievirus B Escapes the Infected Cell in Ejected Mitophagosomes.
Excluded - Off-topic	Betzer, O., Perets, N., et al.	ACS Nano	2017	28960957	In Vivo Neuroimaging of Exosomes Using Gold Nanoparticles.
Excluded - Off-topic	Zhang, G., Zhang, Y., et al.	J Neurooncol	2017	28948499	CD133 positive U87 glioblastoma cells-derived exosomal microRNAs in hypoxia-versus normoxia-microenviroment.
Excluded - Off-topic	Parodi, A., Molinaro, R., et al.	Biomaterials	2017	28946131	Bio-inspired engineering of cell- and virus-like nanoparticles for drug delivery.
Excluded - Off-topic	Tavakoli Dargani, Z., Singla, R., et al.	Can J Physiol Pharmacol	2018	28926719	Exosomes derived from embryonic stem cells inhibit doxorubicin and inflammation-induced pyroptosis in muscle cells.
Excluded - Off-topic	Martel, J., Wu, C.Y., et al.	Sci Rep	2017	28878382	Pleomorphic bacteria-like structures in human blood represent non-living membrane vesicles and protein particles.
Excluded - Off-topic	Lange, T., Stracke, S., et al.	PLoS One	2017	28859135	Identification of miR-16 as an endogenous reference gene for the normalization of urinary exosomal miRNA expression data from CKD patients.
Excluded - Off-topic	Bertoldi, K., Cechinel, L.R., et al.	Mol Cell Biochem	2018	28819811	Circulating extracellular vesicles in the aging process: impact of aerobic exercise.
Excluded - Off-topic	Pakravan, K., Babashah, S., et al.	Cell Oncol (Dordr)	2017	28741069	MicroRNA-100 shuttled by mesenchymal stem cell-derived exosomes suppresses in vitro angiogenesis through modulating the mTOR/HIF-1α/VEGF signaling axis in breast cancer cells.
Excluded - Off-topic	Yuan, D., Zhao, Y., et al.	Biomaterials	2017	28715655	Macrophage exosomes as natural nanocarriers for protein delivery to inflamed brain.
Excluded - Off-topic	Klingeborn, M., Dismuke, W.M., et al.	Sci Rep	2017	28687758	Directional Exosome Proteomes Reflect Polarity-Specific Functions in Retinal Pigmented Epithelium Monolayers.
Excluded - Off-topic	Jackson, C.E., Scruggs, B.S., et al.	Biophys J	2017	28629620	Effects of Inhibiting VPS4 Support a General Role for ESCRTs in Extracellular Vesicle Biogenesis.
Excluded - Off-topic	Manne, U., Jadhav, T., et al.	Curr Colorectal Cancer Rep	2016	28626361	Molecular Biomarkers of Colorectal Cancer and Cancer Disparities: Current Status and Perspective.
Excluded - Off-topic	Xu, B. and Wang, T.	Tumour Biol	2017	28618932	Intimate cross-talk between cancer cells and the tumor microenvironment of B-cell lymphomas: The key role of exosomes.
Excluded - Off-topic	Chang, C.C., Chen, C.Y., et al.	Clin Sci (Lond)	2017	28592554	Urinary glycated uromodulin in diabetic kidney disease.
Excluded - Off-topic	Park, J., Hwang, M., et al.	Anal Chem	2017	28541032	Exosome Classification by Pattern Analysis of Surface-Enhanced Raman Spectroscopy Data for Lung Cancer Diagnosis.
Excluded - Off-topic	Otero-Ortega, L., Gómez de Frutos, M.C., et al.	J Cereb Blood Flow Metab	2018	28524762	Exosomes promote restoration after an experimental animal model of intracerebral hemorrhage.
Excluded - Off-topic	Coumans, F.A.W., Brisson, A.R., et al.	Circ Res	2017	28495994	Methodological Guidelines to Study Extracellular Vesicles.
Excluded - Off-topic	Nafee, N. and Gouda, N.	Curr Gene Ther	2017	28494740	Nucleic Acids-based Nanotherapeutics Crossing the Blood Brain Barrier.
Excluded - Off-topic	Contursi, A., Sacco, A., et al.	Cell Mol Life Sci	2017	28488110	Platelets as crucial partners for tumor metastasis: from mechanistic aspects to pharmacological targeting.
Excluded - Off-topic	Eitan, E., Green, J., et al.	Sci Rep	2017	28465537	Age-Related Changes in Plasma Extracellular Vesicle Characteristics and Internalization by Leukocytes.
Excluded - Off-topic	Sterzenbach, U., Putz, U., et al.	Mol Ther	2017	28412169	Engineered Exosomes as Vehicles for Biologically Active Proteins.
Excluded - Off-topic	Nielsen, M.R., Frederiksen-Møller, B., et al.	Pflugers Arch	2017	28405801	Urine exosomes from healthy and hypertensive pregnancies display elevated level of α-subunit and cleaved α- and γ-subunits of the epithelial sodium channel-ENaC.
Excluded - Off-topic	Bastos, P., Ferreira, R., et al.	Crit Rev Clin Lab Sci	2017	28393582	Insights into the human brain proteome: Disclosing the biological meaning of protein networks in cerebrospinal fluid.
Excluded - Off-topic	Chen, C.C., Liu, L., et al.	Cell Mol Bioeng	2016	28392840	Elucidation of Exosome Migration across the Blood-Brain Barrier Model In Vitro.
Excluded - Off-topic	Mol, E.A., Goumans, M.J., et al.	Nanomedicine	2017	28365418	Higher functionality of extracellular vesicles isolated using size-exclusion chromatography compared to ultracentrifugation.
Excluded - Off-topic	Onderak, A.M., Anderson, J.T., et al.	RNA	2017	28351885	Loss of the RNA helicase SKIV2L2 impairs mitotic progression and replication-dependent histone mRNA turnover in murine cell lines.
Excluded - Off-topic	Truong, G., Guanzon, D., et al.	PLoS One	2017	28350871	Oxygen tension regulates the miRNA profile and bioactivity of exosomes released from extravillous trophoblast cells - Liquid biopsies for monitoring complications of pregnancy.
Excluded - Off-topic	Mateescu, B., Kowal, E.J., et al.	J Extracell Vesicles	2017	28326170	Obstacles and opportunities in the functional analysis of extracellular vesicle RNA - an ISEV position paper.
Excluded - Off-topic	Lim, J.H., Song, M.K., et al.	Toxicol In Vitro	2017	28245982	Comparative analysis of microRNA and mRNA expression profiles in cells and exosomes under toluene exposure.
Excluded - Off-topic	Wei, G., Jie, Y., et al.	Sci Rep	2017	28223684	Dendritic cells derived exosomes migration to spleen and induction of inflammation are regulated by CCR7.
Excluded - Off-topic	Royo, F., Moreno, L., et al.	Sci Rep	2017	28211494	Hepatocyte-secreted extracellular vesicles modify blood metabolome and endothelial function by an arginase-dependent mechanism.
Excluded - Off-topic	Patel, M.M. and Patel, B.M.	CNS Drugs	2017	28101766	Crossing the Blood-Brain Barrier: Recent Advances in Drug Delivery to the Brain.
Excluded - Off-topic	Mirzaei, H., Fathullahzadeh, S., et al.	J Cell Physiol	2018	28084621	State of the art in microRNA as diagnostic and therapeutic biomarkers in chronic lymphocytic leukemia.
Excluded - Off-topic	Sodi, R., Eastwood, J., et al.	Clin Chim Acta	2017	28062296	Relationship between circulating microRNA-30c with total- and LDL-cholesterol, their circulatory transportation and effect of statins.
Excluded - Off-topic	András, I.E., Leda, A., et al.	Mol Cell Neurosci	2017	28040512	Extracellular vesicles of the blood-brain barrier: Role in the HIV-1 associated amyloid beta pathology.
Excluded - Off-topic	Van't Root, M., Lowik, C., et al.	Curr Pharm Des	2017	28025944	Targeting Nanomedicine to Brain Tumors: Latest Progress and Achievements.
Excluded - Off-topic	Ju, Z., Ma, J., et al.	Inflammation	2017	28000095	Exosomes from iPSCs Delivering siRNA Attenuate Intracellular Adhesion Molecule-1 Expression and Neutrophils Adhesion in Pulmonary Microvascular Endothelial Cells.
Excluded - Off-topic	Lässer, C., Théry, C., et al.	J Extracell Vesicles	2016	27989272	The International Society for Extracellular Vesicles launches the first massive open online course on extracellular vesicles.
Excluded - Off-topic	Srivastava, A., Amreddy, N., et al.	Sci Rep	2016	27941871	Nanosomes carrying doxorubicin exhibit potent anticancer activity against human lung cancer cells.
Excluded - Off-topic	Mathiyalagan, P. and Sahoo, S.	Methods Mol Biol	2017	27910046	Exosomes-Based Gene Therapy for MicroRNA Delivery.
Excluded - Off-topic	García-Romero, N., Carrión-Navarro, J., et al.	Oncotarget	2017	27902458	DNA sequences within glioma-derived extracellular vesicles can cross the intact blood-brain barrier and be detected in peripheral blood of patients.
Excluded - Off-topic	Yang, T., Fogarty, B., et al.	AAPS J	2017	27882487	Delivery of Small Interfering RNA to Inhibit Vascular Endothelial Growth Factor in Zebrafish Using Natural Brain Endothelia Cell-Secreted Exosome Nanovesicles for the Treatment of Brain Cancer.
Excluded - Off-topic	Paul, D., Baena, V., et al.	J Neuroinflammation	2016	27852330	Appearance of claudin-5+ leukocytes in the central nervous system during neuroinflammation: a novel role for endothelial-derived extracellular vesicles.
Excluded - Off-topic	Wang, L., Fu, H., et al.	J Hematol Oncol	2016	27842563	Novel extracellular and nuclear caspase-1 and inflammasomes propagate inflammation and regulate gene expression: a comprehensive database mining study.
Excluded - Off-topic	Royo, F., Palomo, L., et al.	Eur J Pharm Sci	2017	27771515	Metabolically active extracellular vesicles released from hepatocytes under drug-induced liver-damaging conditions modify serum metabolome and might affect different pathophysiological processes.
Excluded - Off-topic	Abd-Elhafeez, H.H., Mokhtar, D.M., et al.	Cells Tissues Organs	2017	27802428	Effect of Melatonin on Telocytes in the Seminal Vesicle of the Soay Ram: An Immunohistochemical, Ultrastructural and Morphometrical Study.
Excluded - Off-topic	Oosthuyzen, W., Scullion, K.M., et al.	J Am Soc Nephrol	2016	27020854	Vasopressin Regulates Extracellular Vesicle Uptake by Kidney Collecting Duct Cells.
Excluded - Off-topic	Giusti, I., Delle Monache, S., et al.	Tumour Biol	2016	27448307	From glioblastoma to endothelial cells through extracellular vesicles: messages for angiogenesis.
Excluded - Off-topic	Holzner, S., Senfter, D., et al.	Oncol Rep	2016	27666412	Colorectal cancer cell-derived microRNA200 modulates the resistance of adjacent blood endothelial barriers in vitro.
Excluded - Off-topic	Kwon, S.H., Oh, S., et al.	J Biol Chem	2016	27765817	Adaptor Protein CD2AP and L-type Lectin LMAN2 Regulate Exosome Cargo Protein Trafficking through the Golgi Complex.
Excluded - Off-topic	Bustos-Morán, E., Blas-Rus, N., et al.	Int Rev Cell Mol Biol	2016	27692176	Orchestrating Lymphocyte Polarity in Cognate Immune Cell-Cell Interactions.
Excluded - Off-topic	Balusu, S., Van Wonterghem, E., et al.	EMBO Mol Med	2016	27596437	Identification of a novel mechanism of blood-brain communication during peripheral inflammation via choroid plexus-derived extracellular vesicles.
Excluded - Off-topic	Hadla, M., Palazzolo, S., et al.	Nanomedicine (Lond)	2016	27558906	Exosomes increase the therapeutic index of doxorubicin in breast and ovarian cancer mouse models.
Excluded - Off-topic	Cunha, S., Amaral, M,H., et al.	Curr Med Chem	2016	27554805	Therapeutic Strategies for Alzheimer's and Parkinson's Diseases by Means of Drug Delivery Systems.
Excluded - Off-topic	Serban, K.A., Rezania, S., et al.	Sci Rep	2016	27530098	Structural and functional characterization of endothelial microparticles released by cigarette smoke.
Excluded - Off-topic	Ko, J., Hemphillm M,A., et al.	Sci Rep	2016	27498963	Smartphone-enabled optofluidic exosome diagnostic for concussion recovery.
Excluded - Off-topic	Sun, L., Wang, X., et al.	Antiviral Res	2016	27496004	Exosomes contribute to the transmission of anti-HIV activity from TLR3-activated brain microvascular endothelial cells to macrophages.
Excluded - Off-topic	Strazielle, N. and Ghersi-Egea, J.F.	Curr Pharm Des	2016	27464721	Potential Pathways for CNS Drug Delivery Across the Blood-Cerebrospinal Fluid Barrier.
Excluded - Off-topic	Tunesi, M., Fusco, F., et al.	Front Aging Neurosci	2016	27445790	Optimization of a 3D Dynamic Culturing System for In Vitro Modeling of Frontotemporal Neurodegeneration-Relevant Pathologic Features.
Excluded - Off-topic	Gamperl, H., Plattfaut, C., et al.	Cell Biol Int	2016	27435911	Extracellular vesicles from malignant effusions induce tumor cell migration: inhibitory effect of LMWH tinzaparin.
Excluded - Off-topic	DeMarino, C., Schwab, A., et al.	J Neuroimmune Pharmacol	2017	27372507	Biodegradable Nanoparticles for Delivery of Therapeutics in CNS Infection.
Excluded - Off-topic	Malik, Z.A., Liu, T.T., et al.	Methods Mol Biol	2016	27317185	Cardiac Myocyte Exosome Isolation.
Excluded - Off-topic	Lai, R.C., Yeo, R.W., et al.	Methods Mol Biol	2016	27236691	Isolation and Characterization of Exosome from Human Embryonic Stem Cell-Derived C-Myc-Immortalized Mesenchymal Stem Cells.
Excluded - Off-topic	Shi, M., Kovac, A., et al.	Alzheimers Dement	2016	27234211	CNS tau efflux via exosomes is likely increased in Parkinson's disease but not in Alzheimer's disease.
Excluded - Off-topic	Choy, C. and Jandial, R.	Neurosurgery	2016	27191805	Breast Cancer Exosomes Breach the Blood-Brain Barrier.
Excluded - Off-topic	Ophelders, D.R., Wolfsm T.G., et al.	Stem Cells Transl Med	2016	27160705	Mesenchymal Stromal Cell-Derived Extracellular Vesicles Protect the Fetal Brain After Hypoxia-Ischemia.
Excluded - Off-topic	András, I.E. and Toborek, M.	Tissue Barriers	2015	27141419	Extracellular vesicles of the blood-brain barrier.
Excluded - Off-topic	Kasner, M., Gast, M., et al.	Int J Cardiol	2016	27128572	Circulating exosomal microRNAs predict functional recovery after MitraClip repair of severe mitral regurgitation.
Excluded - Off-topic	Li, X., Tsibouklis, J., et al.	J Drug Target	2017	27126681	Nano carriers for drug transport across the blood-brain barrier.
Excluded - Off-topic	Hinrichs, G.R., Hansen, L.H., et al.	Physiol Rep	2016	27117808	A novel mutation affecting the arginine-137 residue of AVPR2 in dizygous twins leads to nephrogenic diabetes insipidus and attenuated urine exosome aquaporin-2.
Excluded - Off-topic	Morrison, E.E., Bailey, M.A., et al.	J Physiol	2016	27104781	Renal extracellular vesicles: from physiology to clinical application.
Excluded - Off-topic	Wilson, C.M., Naves, T., et al.	Commun Integr Biol	2016	27066187	A new role under sortilin's belt in cancer.
Excluded - Off-topic	Tenreiro, M.M., Ferreira, R., et al.	Neurobiol Dis	2016	26996728	Cellular response of the blood-brain barrier to injury: Potential biomarkers and therapeutic targets for brain regeneration.
Excluded - Off-topic	Greuter, T. and Shah, V.H.	J Gastroenterol	2016	26939970	Hepatic sinusoids in liver injury, inflammation, and fibrosis: new pathophysiological insights.
Excluded - Off-topic	van Dongen, H.M., Masoumi, N., et al.	Microbiol Mol Biol Rev	2016	26935137	Extracellular Vesicles Exploit Viral Entry Routes for Cargo Delivery.
Excluded - Off-topic	Jarmalavičiūtė, A. and Pivoriūnas, A.	Pharmacol Res	2016	26855317	Exosomes as a potential novel therapeutic tools against neurodegenerative diseases.
Excluded - Off-topic	Sandrim, V.C., Luizon, M.R., et al.	BJOG	2016	26853698	Circulating microRNA expression profiles in pre-eclampsia: evidence of increased miR-885-5p levels.
Excluded - Off-topic	Harp, D., Driss, A., et al.	Cell Tissue Res	2016	26841879	Exosomes derived from endometriotic stromal cells have enhanced angiogenic effects in vitro.
Excluded - Off-topic	Hudry, E., Martin, C., et al.	Gene Ther	2016	26836117	Exosome-associated AAV vector as a robust and convenient neuroscience tool.
Excluded - Off-topic	Mora, E.M., Álvarez-Cubela, S., et al.	Int J Mol Sci	2015	26712742	Biobanking of Exosomes in the Era of Precision Medicine: Are We There Yet?
Excluded - Off-topic	Dieudé, M., Bell, C., et al.	Sci Transl Med	2015	26676607	The 20S proteasome core, active within apoptotic exosome-like vesicles, induces autoantibody production and accelerates rejection.
Excluded - Off-topic	Shomer, E., Katzenell, S., et al.	Thromb Res	2016	26639203	Microvesicles of pregnant women receiving low molecular weight heparin improve trophoblast function.
Excluded - Off-topic	Raymond, A.D., Diaz, P., et al.	J Neurovirol	2016	26631079	Microglia-derived HIV Nef+ exosome impairment of the blood-brain barrier is treatable by nanomedicine-based delivery of Nef peptides.
Excluded - Off-topic	Holder, B., Jones, T., et al.	Traffic	2016	26602702	Macrophage Exosomes Induce Placental Inflammatory Cytokines: A Novel Mode of Maternal-Placental Messaging.
Excluded - Off-topic	Hogan, M.C., Lieske, J.C.,	BMC Nephrol	2015	26577187	Strategy and rationale for urine collection protocols employed in the NEPTUNE study.
Excluded - Off-topic	Tutakhel, O.A., Jeleń, S., et al.	Am J Physiol Renal Physiol	2016	26561651	Alternative splice variant of the thiazide-sensitive NaCl cotransporter: a novel player in renal salt handling.
Excluded - Off-topic	Turpin, D., Truchetet, M.E., et al.	Autoimmun Rev	2016	26554931	Role of extracellular vesicles in autoimmune diseases.
Excluded - Off-topic	Dovizio, M., Alberti, S., et al.	Biochem Soc Trans	2015	26551717	Novel insights into the regulation of cyclooxygenase-2 expression by platelet-cancer cell cross-talk.
Excluded - Off-topic	Plebanek, M.P., Mutharasan, R.K., et al.	Sci Rep	2015	26511855	Nanoparticle Targeting and Cholesterol Flux Through Scavenger Receptor Type B-1 Inhibits Cellular Exosome Uptake.
Excluded - Off-topic	van Niel, G., Bergam, P., et al.	Cell Rep	2015	26387950	Apolipoprotein E Regulates Amyloid Formation within Endosomes of Pigment Cells.
Excluded - Off-topic	Jaé, N., McEwan, D.G., et al.	FEBS Lett	2015	26348397	Rab7a and Rab27b control secretion of endothelial microRNA through extracellular vesicles.
Excluded - Off-topic	Huber, H.J. and Holvoet, P.	Curr Opin Lipidol	2015	26309202	Exosomes: emerging roles in communication between blood cells and vascular tissues during atherosclerosis.
Excluded - Off-topic	Mayo, J.N. and Bearden, S.E.	Microcirculation	2015	26243428	Driving the Hypoxia-Inducible Pathway in Human Pericytes Promotes Vascular Density in an Exosome-Dependent Manner.
Excluded - Off-topic	Yoon, C., Kim, J., et al.	Tumour Biol	2016	26211004	Delivery of miR-155 to retinal pigment epithelial cells mediated by Burkitt's lymphoma exosomes.
Excluded - Off-topic	Burger, D., Viñas, J.L., et al.	Am J Pathol	2015	26073035	Human endothelial colony-forming cells protect against acute kidney injury: role of exosomes.
Excluded - Off-topic	Hoefer, I.E., Steffens, S., et al.	Eur Heart J	2015	26049157	Novel methodologies for biomarker discovery in atherosclerosis.
Excluded - Off-topic	Yang, C.H., Chou, H.C., et al.	Biochim Biophys Acta	2015	25912735	EGFR over-expression in non-small cell lung cancers harboring EGFR mutations is associated with marked down-regulation of CD82.
Excluded - Off-topic	Rinschen, M.M., Benzing, T., et al.	Proteomics Clin Appl	2015	25907645	Proteomic analysis of the kidney filtration barrier--Problems and perspectives.
Excluded - Off-topic	Kanchi Ravi, R., Khosroheidari, M., et al.	J Vis Exp	2015	25651044	A modified precipitation method to isolate urinary exosomes.
Excluded - Off-topic	Mehdiani, A., Maier, A., et al.	J Vis Exp	2015	25650897	An innovative method for exosome quantification and size measurement.
Excluded - Off-topic	Andersen, H., Friis, U.G., et al.	Nephrol Dial Transplant	2015	25609736	Diabetic nephropathy is associated with increased urine excretion of proteases plasmin, prostasin and urokinase and activation of amiloride-sensitive current in collecting duct cells.
Excluded - Off-topic	Yang, T., Martin, P., et al.	Pharm Res	2015	25609010	Exosome delivered anticancer drugs across the blood-brain barrier for brain cancer therapy in Danio rerio.
Excluded - Off-topic	Qin, X., Xu, H., et al.	Front Oncol	2015	25601903	The Tumor Cytosol miRNAs, Fluid miRNAs, and Exosome miRNAs in Lung Cancer.
Excluded - Off-topic	Zhang, Y., Chopp, M., et al.	J Neurosurg	2015	25594326	Effect of exosomes derived from multipluripotent mesenchymal stromal cells on functional recovery and neurovascular plasticity in rats after traumatic brain injury.
Excluded - Off-topic	Rojas-Veja, L., Reyes-Castro, L.A., et al.	Am J Physiol Renal Physiol	2015	25587121	Ovarian hormones and prolactin increase renal NaCl cotransporter phosphorylation.
Excluded - Off-topic	Fernández-Messina, L., Gutiérrez-Vázquez, C., et al.	Biol Cell	2015	25564937	Immunomodulatory role of microRNAs transferred by extracellular vesicles.
Excluded - Off-topic	Srivastava, A., Filant, J., et al.	Curr Gene Ther	2015	25537774	Exosomes: a role for naturally occurring nanovesicles in cancer growth, diagnosis and treatment.
Excluded - Off-topic	Kumar, A., Baycin-Hizal, D., et al.	Proteomics Clin Appl	2015	25523641	Coupling enrichment methods with proteomics for understanding and treating disease.
Excluded - Off-topic	Hatanaka, M., Higashi, Y., et al.	Anticancer Res	2014	25503136	Cleaved CD147 shed from the surface of malignant melanoma cells activates MMP2 produced by fibroblasts.
Excluded - Off-topic	Yoon, Y.J., Kim, D.K., et al.	PLoS One	2014	25502753	Egr-1 activation by cancer-derived extracellular vesicles promotes endothelial cell migration via ERK1/2 and JNK signaling pathways.
Excluded - Off-topic	Nemoto, T., Kakinuma, Y., et al.	J Endocrinol	2015	25480379	Impaired miR449a-induced downregulation of Crhr1 expression in low-birth-weight rats
Excluded - Off-topic	Kim, D.K., Lee. J., et al.	Bioinformatics	2015	25388151	EVpedia: a community web portal for extracellular vesicles research.
Excluded - Off-topic	Willis, G.R., Connolly, K., et al.	Hum Reprod	2014	25336711	Young women with polycystic ovary syndrome have raised levels of circulating annexin V-positive platelet microparticles
Excluded - Off-topic	Brinton, L.T., Sloane, H.S., et al.	Cell Mol Life Sci	2015	25336151	Formation and role of exosomes in cancer.
Excluded - Off-topic	Umezu, T., Tadokoro, H., et al.	Blood	2014	25320245	Exosomal miR-135b shed from hypoxic multiple myeloma cells enhances angiogenesis by targeting factor-inhibiting HIF-1.
Excluded - Off-topic	Musante, L., Tataruch, D.E., et al.	Front Endocrinol (Lausanne)	2014	25309511	Use and isolation of urinary exosomes as biomarkers for diabetic nephropathy.
Excluded - Off-topic	Mion, F., D'Incà, F., et al.	J Immunol	2014	25267976	Mast cells control the expansion and differentiation of IL-10-competent B cells.
Excluded - Off-topic	Connolly, K.D., Willis, G.R., et al.	J Lipid Res	2014	25121984	Lipoprotein-apheresis reduces circulating microparticles in individuals with familial hypercholesterolemia.
Excluded - Off-topic	Effenberger, T., von der Heyde, J., et al.	FASEB J	2014	25077560	Senescence-associated release of transmembrane proteins involves proteolytic processing by ADAM17 and microvesicle shedding.
Excluded - Off-topic	Zachar, R.M., Skjødt, K., et al.	J Am Soc Nephrol	2015	25060057	The epithelial sodium channel γ-subunit is processed proteolytically in human kidney.
Excluded - Off-topic	Alvarez, M.L.	Methods Mol Biol	2014	25055908	Isolation of urinary exosomes for RNA biomarker discovery using a simple, fast, and highly scalable method.
Excluded - Off-topic	Soki, F.N., Koh, A.J., et al.	J Biol Chem	2014	25006249	Polarization of prostate cancer-associated macrophages is induced by milk fat globule-EGF factor 8 (MFG-E8)-mediated efferocytosis.
Excluded - Off-topic	Svenningsen, P., Nielsen, M.R., et al.	Acta Physiol (Oxf)	2014	24913262	TMEM16A is a Ca(2+) -activated Cl(-) channel expressed in the renal collecting duct.
Excluded - Off-topic	Kalani, A., Kamat, P.K., et al.	Life Sci	2014	24780320	Curcumin-primed exosomes mitigate endothelial cell dysfunction during hyperhomocysteinemia.
Excluded - Off-topic	Christianson, H.C., Svensson, K.J., et al.	Semin Cancer Biol	2014	24769057	Exosome and microvesicle mediated phene transfer in mammalian cells.
Excluded - Off-topic	Zhou, W., Fong, M.Y., et al.	Cancer Cell	2014	24735924	Cancer-secreted miR-105 destroys vascular endothelial barriers to promote metastasis.
Excluded - Off-topic	Comelli, L., Rocchiccioli, S., et al.	Mol Biosyst	2014	24626815	Characterization of secreted vesicles from vascular smooth muscle cells.
Excluded - Off-topic	Yu, B., Zhang, X., et al.	Int J Mol Sci	2014	24608926	Exosomes derived from mesenchymal stem cells.
Excluded - Off-topic	Fornaciari, I., Fierabracci, V., et al.	PLoS One	2014	24533101	Gamma-glutamyltransferase fractions in human plasma and bile: characteristic and biogenesis.
Excluded - Off-topic	Sano, S., Izumi, Y., et al.	Biochem Biophys Res Commun	2014	24513287	Lipid synthesis is promoted by hypoxic adipocyte-derived exosomes in 3T3-L1 cells.
Excluded - Off-topic	Sharghi-Namini, S., Tan, E., et al.	Sci Rep	2014	24504253	Dll4-containing exosomes induce capillary sprout retraction in a 3D microenvironment.
Excluded - Off-topic	Levine, P., McDaniel, K., et al.	Dig Liver Dis	2014	24440312	Molecular mechanisms of stem cell therapy in alcoholic liver disease.
Excluded - Off-topic	Kwon, S.H., Liu, K.D., et al.	Curr Biol	2014	24412205	Intercellular transfer of GPRC5B via exosomes drives HGF-mediated outward growth.
Excluded - Off-topic	Yamashita, T., Kamada, H., et al.	Pharmazie	2013	24400444	Epidermal growth factor receptor localized to exosome membranes as a possible biomarker for lung cancer diagnosis.
Excluded - Off-topic	Hood, J.L., Scott, M.J., et al.	Anal Biochem	2014	24333249	Maximizing exosome colloidal stability following electroporation.
Excluded - Off-topic	Ju, R., Zhuang, Z.W., et al.	J Biol Chem	2014	24235146	Angiopoietin-2 secretion by endothelial cell exosomes: regulation by the phosphatidylinositol 3-kinase (PI3K)/Akt/endothelial nitric oxide synthase (eNOS) and syndecan-4/syntenin pathways.
Excluded - Off-topic	Oosthuyzen, W., Sime, N.E., et al.	J Physiol	2013	24060994	Quantification of human urinary exosomes by nanoparticle tracking analysis.
Excluded - Off-topic	Cazzoli, R., Buttitta, F., et al.	J Thorac Oncol	2013	23945385	microRNAs derived from circulating exosomes as noninvasive biomarkers for screening and diagnosing lung cancer.
Excluded - Off-topic	Di Noto, G., Paolini, L., et al.	PLoS One	2013	23940647	C-src enriched serum microvesicles are generated in malignant plasma cell dyscrasia.
Excluded - Off-topic	Li, C.C., Eaton, S.A., et al.	RNA Biol	2013	23807490	Glioma microvesicles carry selectively packaged coding and non-coding RNAs which alter gene expression in recipient cells.
Excluded - Off-topic	Parikh, V.N. and Chan, S.Y.	Methods Mol Biol	2013	23719949	Analysis of microRNA niches: techniques to measure extracellular microRNA and intracellular microRNA in situ.
Excluded - Off-topic	Kucharzewska, P., Christianson, H.C., et al.	Proc Natl Acad Sci U S A	2013	23589885	Exosomes reflect the hypoxic status of glioma cells and mediate hypoxia-dependent activation of vascular cells during tumor development.
Excluded - Off-topic	O'Brien, K., Rani, S., et al.	Eur J Cancer	2013	23453937	Exosomes from triple-negative breast cancer cells can transfer phenotypic traits representing their cells of origin to secondary cells.
Excluded - Off-topic	Dear, J.W., Street, J.M., et al.	Proteomics	2013	23129434	Urinary exosomes: a reservoir for biomarker discovery and potential mediators of intrarenal signalling.
Excluded - Off-topic	El Andaloussi, S., Lakhal, S., et al.	Adv Drug Deliv Rev	2013	22921840	Exosomes for targeted siRNA delivery across biological barriers.
Excluded - Off-topic	Alvarez, M.L., Khosroheidari, M., et al.	Kidney Int	2012	22785172	Comparison of protein, microRNA, and mRNA yields using different methods of urinary exosome isolation for the discovery of kidney disease biomarkers.
Excluded - Off-topic	Sun, D., Zhuang, X., et al.	Adv Drug Deliv Rev	2013	22776312	Exosomes are endogenous nanoparticles that can deliver biological information between cells.
Excluded - Off-topic	Tannetta, D., Mackeen, M., et al.	Pregnancy Hypertens	2012	26105259	OS045. Multi-dimensional protein identification technology analysis of syncytiotrophoblast vesicles released from perfused preeclampsia placentas
Excluded - Off-topic	Gilabert-Estelles, J., Braza-Boils, A., et al.	Curr Med Chem	2012	22455593	Role of microRNAs in gynecological pathology.
Excluded - Off-topic	Soleti, R., Martinez, M.C., et al.	Vitam Horm	2012	22391314	Sonic Hedgehog on microparticles and neovascularization.
Excluded - Off-topic	Schaefer, T., Zajonz, A., et al.	Allergy	2012	22313335	Luminal decoration of blood vessels by activated perivasal mast cells in allergic rhinitis.
Excluded - Off-topic	Street, J.M., Barran, P.E., et al.	J Transl Med	2012	22221959	Identification and proteomic profiling of exosomes in human cerebrospinal fluid.
Excluded - Off-topic	Street, J.M., Birkhoff, W., et al.	J Physiol	2011	22025668	Exosomal transmission of functional aquaporin 2 in kidney cortical collecting duct cells.
Excluded - Off-topic	Svensson, K.J., Kucharzewska, P., et al.	Proc Natl Acad Sci U S A	2011	21788507	Hypoxia triggers a proangiogenic pathway involving cancer cell microvesicles and PAR-2-mediated heparin-binding EGF signaling in endothelial cells.
Excluded - Off-topic	Müller, G., Schneider, M., et al.	Cell Signal	2011	21435393	Microvesicles released from rat adipocytes and harboring glycosylphosphatidylinositol-anchored proteins transfer RNA stimulating lipid synthesis.
Excluded - Off-topic	Cantarero, I., Luesma, M.J., et al.	J Cell Mol Med	2011	21435170	The primary cilium of telocytes in the vasculature: electron microscope imaging.
Excluded - Off-topic	Balaj, L., Lessard, R., et al.	Nat Commun	2011	21285958	Tumour microvesicles contain retrotransposon elements and amplified oncogene sequences
Excluded - Off-topic	Little, K.M., Smalley, D.M., et al.	Semin Thromb Hemost	2010	21049385	The plasma microparticle proteome.
Excluded - Off-topic	Sirois, I., Raymond, M.A., et al.	Cell Death Differ	2011	20966960	Caspase-3-dependent export of TCTP: a novel pathway for antiapoptotic intercellular communication.
Excluded - Off-topic	Aliotta, J.M., Pereira, M., et al.	Exp Hematol	2010	20079801	Microvesicle entry into marrow cells mediates tissue-specific changes in mRNA by direct delivery of mRNA and induction of transcription.
Excluded - Off-topic	Hood, J.L., Pan, H., et al.	Lab Invest	2009	19786948	Paracrine induction of endothelium by tumor exosomes.
Excluded - Off-topic	Walker, J.D., Maier, C.L., et al.	J Immunol	2009	19155503	Cytomegalovirus-infected human endothelial cells can stimulate allogeneic CD4+ memory T cells by releasing antigenic exosomes.
Excluded - Off-topic	Graner, M.W., Alzate, O., et al.	FASEB J	2009	19109410	Proteomic and immunologic analyses of brain tumor exosomes.
Excluded - Off-topic	Klibi, J., Niki, T., et al.	Blood	2009	19005181	Blood diffusion and Th1-suppressive effects of galectin-9-containing exosomes released by Epstein-Barr virus-infected nasopharyngeal carcinoma cells.
Excluded - Off-topic	Islam, A., Jones, H., et al.	J Biol Chem	2008	18625701	cAMP-dependent protein kinase A (PKA) signaling induces TNFR1 exosome-like vesicle release via anchoring of PKA regulatory subunit RIIbeta to BIG2.
Excluded - Off-topic	Adamik, B., Islam, A., et al.	Biochem Biophys Res Commun	2008	18445477	ARTS-1 regulates extracellular TNFR1 release.
Excluded - Off-topic	Islam, A., Shen, X., et al.	J Biol Chem	2007	17276987	The brefeldin A-inhibited guanine nucleotide-exchange protein, BIG2, regulates the constitutive release of TNFR1 exosome-like vesicles.
Excluded - Off-topic	Gesierich, S., Berezovskiy, I., et al.	Cancer Res	2006	16849554	Systemic induction of the angiogenesis switch by the tetraspanin D6.1A/CO-029.
Excluded - Off-topic	Islam, A., Adamik, B., et al.	J Biol Chem	2006	16407280	Extracellular TNFR1 release requires the calcium-dependent formation of a nucleobindin 2-ARTS-1 complex.
Excluded - Off-topic	Levine, S.J., Adamik, B., et al.	Am J Physiol Lung Cell Mol Physiol	2005	15821012	Proteasome inhibition induces TNFR1 shedding from human airway epithelial (NCI-H292) cells.
Excluded - Off-topic	Janowska-Wieczorek, A., Wysoczynski, M., et al.	Int J Cancer	2005	15499615	Microvesicles derived from activated platelets induce metastasis and angiogenesis in lung cancer.
Excluded - Off-topic	Janiszewski, M., Do Carmo, A.O., et al.	Crit Care Med	2004	15090968	Platelet-derived exosomes of septic individuals possess proapoptotic NAD(P)H oxidase activity: A novel vascular redox pathway.
Excluded - Off-topic	Kho, C.J., Huggins, G.S., et al.	J Biol Chem	1997	9148967	The polymyositis-scleroderma autoantigen interacts with the helix-loop-helix proteins E12 and E47.
Excluded - Editorial	Perez-Toledo, M., Beristain-Covarrubias, N.	Platelets	2020	32310724	A new player in the game: platelet-derived extracellular vesicles in dengue hemorrhagic fever
Excluded - Editorial	Pham, T.P., Boon, R.A.	Cardiovasc Res	2020	31321404	Exosomes and non-coding RNA, the healers of the heart?
Excluded - Editorial	Toyama, K., Mogi, M., et al.	Aging (Albany NY).	2019	30867338	microRNA-based biomarker for dementia.
Excluded - Editorial	Blaser, M.C. and Aikawa, E.	Circ Res	2019	30763209	Differential miRNA Loading Underpins Dual Harmful and Protective Roles for Extracellular Vesicles in Atherogenesis.
Excluded - Editorial	Wang, J., Zhao, C., et al.	J Cardiovasc Transl Res	2019	30617761	Exosomes in Cardiovascular Diseases and Treatment: Experimental and Clinical Aspects.
Excluded - Editorial	Hong, T. and Shaw, R.M.	Trends Cardiovasc Med	2018	30471985	Editorial commentary: Extracellular vesicles in cardiovascular diagnosis and therapy.
Excluded - Editorial	Menasché, P.	J Thorac Cardiovasc Surg	2018	29779642	Stem cell-derived exosomes and the failing heart: Small cause, big effect.
Excluded - Editorial	Abreu, R.C., da Costa Martins, P.A.	Am J Physiol Heart Circ Physiol	2018	29473757	cROSsing the cardiac MIRe: fibroblast-cardiomyocyte ex(o)press
Excluded - Editorial	Matthay, M.A. and Abman, S.H.	Am J Respir Crit Care Med	2018	28957642	Exosome-based Therapy for Bronchopulmonary Dysplasia.
Excluded - Editorial	Fish, K.M. and Hulot, J.S.	J Am Coll Cardiol	2017	28385313	In Vitro Adherence Defines Therapeutic Cardiac Mesenchymal Cell Subpopulation.
Excluded - Editorial	Srikanth Garikipati, V.N. and Kishore, R.	Circ Res	2017	28254793	Young Hearts Run Free: Therapeutic Potential of Neonatal Human Cardiac Progenitor Cells Secretome.
Excluded - Editorial	Kishore, R. and Khan, M.	Eur Heart J	2017	28158461	Cardiac cell-derived exosomes: changing face of regenerative biology.
Excluded - Editorial	Eguchi, S. and Rizzo, V.	Clin Sci (Lond)	2017	27872171	Organelles in health and diseases.
Excluded - Editorial	Ottaviani, L., De Windt, L,J., et al.	Ann Transl Med	2016	27384882	Exosomes: scytales in the damaged heart.
Excluded - Editorial	Liang, Y. and Sahoo, S.	J Am Coll Cardiol	2015	26248986	Exosomes Explosion for Cardiac Resuscitation.
Excluded - Editorial	Ong, S.G. and Wu, J.C.	Circ Res	2015	26089361	Exosomes as potential alternatives to stem cell therapy in mediating cardiac regeneration.
Excluded - Editorial	Zablocki, D. and Sadoshima, J.	Circulation	2015	25995314	Inside-Out Signaling: Moving the AT1 Receptor in to Get the Message Out.
Excluded - Editorial	Tintut, Y. and Demer, L.L.	Circ Res	2015	25858057	Exosomes: nanosized cellular messages.
Excluded - Editorial	Sluijter, J.P. and van Rooij, E.	Circ Res	2015	25593269	Exosomal microRNA clusters are important for the therapeutic effect of cardiac progenitor cells.
Excluded - Editorial	Lötvall, J., Hill, A.F., et al.	J Extracell Vesicles	2014	25536934	Minimal experimental requirements for definition of extracellular vesicles and their functions: a position statement from the International Society for Extracellular Vesicles.
Excluded - Editorial	Shantikumar, S., Angelini, G.D., et al.	J Mol Cell Cardiol	2014	24874423	Diabetes, microRNAs and exosomes: Les liaisons dangereuses.
Excluded - Editorial	Dear, J.W.	J Am Soc Nephrol	2014	24700877	Urinary exosomes join the fight against infection.
Excluded - Editorial	Hirsch, E., Hilfiker-Kleiner, D., et al.	Cardiovasc Res	2013	23860811	Interaction of the heart and its close and distant neighbours: report of the Meeting of the ESC Working Groups Myocardial Function and Cellular Biology.
Excluded - Editorial	Wood, M.J., O'Loughlin, A.J., et al.	Ther Deliv	2011	22833906	Exosomes and the blood-brain barrier: implications for neurological diseases.
Excluded - Position paper	Russell, A.E., Sneider, A., et al.	J Extracell Vesicles	2019	31762963	Biological membranes in EV biogenesis, stability, uptake, and cargo transfer: an ISEV position paper arising from the ISEV membranes and EVs workshop
Excluded - Position paper	Théry, C., Witwer, K.W., et al.	J Extracell Vesicles	2018	30637094	Minimal information for studies of extracellular vesicles 2018 (MISEV2018): a position statement of the International Society for Extracellular Vesicles and update of the MISEV2014 guidelines.
Excluded - Position paper	Sluijter, J.P.G., Davidson, S.M., et al.	Cardiovasc Res	2018	29106545	Extracellular vesicles in diagnostics and therapy of the ischaemic heart: Position Paper from the Working Group on Cellular Biology of the Heart of the European Society of Cardiology.
Excluded - Position paper	Lener, T., Gimona, M., et al.	J Extracell Vesicles	2016	26725829	Applying extracellular vesicles based therapeutics in clinical trials - an ISEV position paper.
Excluded - Meeting report	Dawn, B., Prentice, D.A., et al.	Circ Res	2018	29929972	Meeting Report and Perspectives: The 5th Annual Midwest Conference on Cell Therapy and Regenerative Medicine.
Excluded - Meeting report	Laurent, L.C., Abdel-Mageed, A.B., et al.	J Extracell Vesicles	2015	26320937	Meeting report: discussions and preliminary findings on extracellular RNA measurement methods from laboratories in the NIH Extracellular RNA Communication Consortium.
Excluded - Meeting report	Mishra, P.J.	Biomark Res	2014	25356314	MicroRNAs as promising biomarkers in cancer diagnostics
Excluded - Commentary	Bateson, B., van Berkel, V.	J Thorac Cardiovasc Surg	2020	32507302	Commentary: Curiouser and curiouser-The role of exosomes in transplant rejection			Bateson B	J Thorac Cardiovasc Surg	2020
Excluded - Commentary	Katz, M.G., Fargnoli, A.S., et al.	J Thorac Cardiovasc Surg	2019	31003740	MicroRNA-25 upregulation protects spinal cords, yet is bad for the heart: The dark side of noncoding RNAS
Excluded - Commentary	Chimenti, I. and Frati, G.	Hypertension	2018	29866741	Cell-Derived Exosomes for Cardiovascular Therapies: Y (Not) RNAs?
Excluded - Commentary	Zhao, Z., Zlokovic, B.V.	Cell Res	2017	28674430	Remote control of BBB: A tale of exosomes and microRNA
Excluded - Commentary	Sahoo, S., Mathiyalagan, P., et al.	Mol Ther	2017	28215995	Pericardial Fluid Exosomes: A New Material to Treat Cardiovascular Disease.
Excluded - Commentary	Sahoo, S. and Emanueli, C.	Diabetes	2016	27659226	Exosomes in Diabetic Cardiomyopathy: The Next-Generation Therapeutic Targets?
Excluded - Commentary	Yang, Y., Rodriguez, J.E., et al.	J Clin Invest	2013	23619357	A microRNA links prolactin to peripartum cardiomyopathy
Excluded - Erratum	Dykes, I.M.	Cardiol Ther	2018	29520573	Correction to: Exosomes in Cardiovascular Medicine.
Excluded - Erratum	Hervera, A., De Virgiliis, F., et al.	Nat Cell Biol	2018	29520084	Publisher Correction: Reactive oxygen species regulate axonal regeneration through the release of exosomal NADPH oxidase 2 complexes into injured axons
Excluded - Viewpoints/Opinion	Yang, P.C.	Circ Res	2018	29496797	Induced Pluripotent Stem Cell (iPSC)-Derived Exosomes for Precision Medicine in Heart Failure.
Excluded - Viewpoints/Opinion	Yuan, S., Zhang, Z.W., et al.	Front Cell Infect Microbiol	2017	28932709	Trehalose May Decrease the Transmission of Zika Virus to the Fetus by Activating Degradative Autophagy.
Excluded - Viewpoints/Opinion	Penn, M.S.	Circ Res	2017	28360345	The Unraveling of the Matryoshka Doll.
Excluded - Viewpoints/Opinion	Glembotski, C.C.	Circ Res	2017	28254800	Expanding the Paracrine Hypothesis of Stem Cell-Mediated Repair in the Heart: When the Unconventional Becomes Conventional.
Excluded - Viewpoints/Opinion	Davis, M.E.	Circ Res	2016	27932472	Exosomes: What Do We Love So Much About Them?
Excluded - Correspondence	Chen, W. and Shen, Z.	Circulation	2018	29311353	Letter by Chen and Shen Regarding Article, "Exosomal MicroRNA Transfer Into Macrophages Mediates Cellular Postconditioning".
Excluded - Correspondence	Khalyfa, A., Gozal, D., et al.	Am J Respir Crit Care Med	2018	29053009	Plasma Exosomes Disrupt the Blood-Brain Barrier in Children with Obstructive Sleep Apnea and Neurocognitive Deficits
Excluded - Correspondence	Li, Y., Zhou, J., et al.	Nat Rev Cardiol	2017	28631753	Dominant and recessive imprinting of exosomes from parent cells.
Excluded - Correspondence	Fan, Z.X. and Yang, J.	Int J Cardiol	2017	28560958	Exosomes-ADMS: A novel therapy thought in myocardial ischemia reperfusion injury.
Excluded - Correspondence	Ong, S.G., Lee, W.H., et al.	Circulation	2015	25802264	Response to letter regarding article, "Cross talk of combined gene and cell therapy in ischemic heart disease: role of exosomal microRNA transfer".
Excluded - Correspondence	Li, Y. and Hong, K.	Circulation	2015	25802263	Letter by Li and Hong regarding article, "Cross talk of combined gene and cell therapy in ischemic heart disease: role of exosomal microRNA transfer".
Excluded - Correspondence	Li, Y., Shen, Z., et al.	Nat Rev Cardiol	2015	25622846	Transport of microRNAs via exosomes.
Excluded - Correspondence	Pirola, C.J., Gianotti, T.F., et al.	Hepatology	2013	23111985	Circulating MicroRNA-122 signature in nonalcoholic fatty liver disease and cardiovascular disease: a new endocrine system in metabolic syndrome.
Excluded - Foreign languages	Shi, X.D., Yu, L.J., et al.	Zhonghua Lao Dong Wei Sheng Zhi Ye Bing Za Zhi	2020	32447901	[Progress in study on intervention of silica-induced pulmonary fibrosis with the exosomes released from mesenchymal stem cells]
Excluded - Foreign languages	He, Y., Cui, X.G., et al.	Zhonghua Xin Xue Guan Bing Za Zhi	2019	31648466	[Impact of CD137-CD137L signaling on secretion of mouse vascular smooth muscle cells-derived exosomes: role of Rab7 pathway]
Excluded - Foreign languages	Fang, L., Shi, X.F., et al.	Zhongguo Shi Yan Xue Ye Xue Za Zhi	2018	30295279	[Effects of Exosomes Derived from miR-486 Gene Modified Umbilical Cord Mesenchymal Stem Cells on Biological Characteristics of Rat Cardiomyocytes].
Excluded - Foreign languages	Li, F., Fang, R., et al.	Zhejiang Da Xue Xue Bao Yi Xue Ban	2018	30226336	[Research progress on exosomes in diagnosis and treatment of cardiovascular diseases].
Excluded - Foreign languages	Huang, J., Kang, B., et al.	Zhongguo Xiu Fu Chong Jian Wai Ke Za Zhi	2017	29798660	[Protective effect of exosome on organs after ischemia-reperfusion injury].
Excluded - Foreign languages	Saint-Pol, J., Gosselet, F.	Med Sci (Paris)	2018	29658470	[Small but sturdy: neuronal-derived exosomes control brain vasculature integrity]
Excluded - Foreign languages	He, Y.F. and Shi, B.	Zhonghua Xin Xue Guan Bing Za Zhi	2017	28316185	[Research update on exosomes-mediated cardiovascular diseases].
Excluded - Foreign languages	Nazimek, K., Filipczak-Bryniarska, I., et al.	Postepy Hig Med Dosw (Online)	2015	26400897	[The role of medicaments, exosomes and miRNA molecules in modulation of macrophage immune activity].
Excluded - Foreign languages	Nakayama, A.	Rinsho Byori	2014	25669044	[Comprehensive analysis of urinary proteins for identification of renal disease markers].
Excluded - Foreign languages	Hüe, S., Ingen-Housz-Oro. S., et al.	Ann Dermatol Venereol	2013	23395500	[Systemic sclerosis autoantibodies: what dermatologists must know].
Excluded - Foreign languages	Inzhutova, A.I., Larionov, A.A., et al.	Vestn Ross Akad Med Nauk	2011	22312904	[Modulation of membrane blebbing and microparticle sheddimg as a target of cardiovascular prophylaxis].
Excluded - Foreign languages	Song, J.Q., Liu, M.L., et al.	Sheng Li Ke Xue Jin Zhan	2010	21416931	[Microvesicle as a novel mediator of cell-to-cell communication and its roles in cardiovascular diseases].
Excluded - Study protocol	Bebelman, M.P., Bun, P., et al.	Nat Protoc	2020	31836866	Real-time imaging of multivesicular body-plasma membrane fusion to quantify exosome release from single cells
Excluded - Study protocol	Arenaza, L., Medrano, M., et al.	Trials	2017	28793919	Prevention of diabetes in overweight/obese children through a family based intervention program including supervised exercise (PREDIKID project): study protocol for a randomized controlled trial.
Excluded - Study protocol	Bollati, V., Iodice, S., et al.	BMC Public Health	2014	25371091	Susceptibility to particle health effects, miRNA and exosomes: rationale and study protocol of the SPHERE study.
Excluded - Study protocol	Weber, A., Wehmeyer, J.C., et al.	J Vis Exp	2019	30663708	Rapid Fluorescence-based Characterization of Single Extracellular Vesicles in Human Blood with Nanoparticle-tracking Analysis.
Excluded - Study protocol	Okuma, Y., Morikawa, K., et al.	Thorac Cancer	2019	30536780	Prospective exosome-focused translational research for afatinib study of non-small cell lung cancer patients expressing EGFR (EXTRA study).
Excluded - Retracted article	Sun, J., Zhang, Z., et al.	Stem Cell Res Ther	2019	31186059	Retraction Note: Endothelial progenitor cell-derived exosomes, loaded with miR-126, promoted deep vein thrombosis resolution and recanalization
Excluded - Without access	Sun, Y., Liu, X.L., et al.	Curr Vasc Pharmacol	2018	29532758	Platelet-derived exosomes affect the proliferation and migration of human umbilical vein endothelial cells via miR-126.

## Sheet: EXO and EXO-based mediators
Table S2 - Description of the studies selected for analysis. Exosome and exosome-based mediators and respective variation, values and isolation method.
PMID	Reference	Human/Mice/Rats samples	Isolation method	Biofluid	Fresh/Stored samples	Exosome characterization methods	Exosome caracterization	Procedures	Cardiovascular disease, risk factor or complication	Mediators origin	Mediators	Expression variation (up-regulated: +, down-regulation: -, no difference: =)	Values ( +/- SEM) Patients	Values ( +/- SEM) Healthy	Fold change	p-value	Statistical analysis	Technique	Number of patients/mice	Number of control individuals/mice	Age (years/weeks old) patients/mice	Age (years/weeks old) control individuals/mice	Gender (male %) patients/mice	Gender (male %) control individuals/mice	Procedures for animal model	Inclusion criteria	Exclusion criteria
32061123	Escate, R., Padró, T., et al. 2020	Human	Filtration	Plasma	-	Nanoparticle tracking analysis and flow cytometry (CD63 and CD81)	-	-	Familial hypercholesterolaemia (with a cardiovascular event)	Plasma-derived exosomes	miR-130b	+	-	-	-	0.018	Mann-Whitney test	TaqMan array	42	30	64 ± 2	52 ± 3	0.69	0.4	-	-	-
32061123	Escate, R., Padró, T., et al. 2020	Human	Filtration	Plasma	-	Nanoparticle tracking analysis and flow cytometry (CD63 and CD81)	-	-	Familial hypercholesterolaemia (with a cardiovascular event)	Plasma-derived exosomes	miR-133a	+	-	-	-	0.05	Mann-Whitney test	TaqMan array	42	30	64 ± 2	52 ± 3	0.69	0.4	-	-	-
32061123	Escate, R., Padró, T., et al. 2020	Human	Filtration	Plasma	-	Nanoparticle tracking analysis and flow cytometry (CD63 and CD81)	-	-	Familial hypercholesterolaemia (with a cardiovascular event)	Plasma-derived exosomes	miR-142-3p	+	-	-	-	0.049	Mann-Whitney test	TaqMan array	42	30	64 ± 2	52 ± 3	0.69	0.4	-	-	-
32061123	Escate, R., Padró, T., et al. 2020	Human	Filtration	Plasma	-	Nanoparticle tracking analysis and flow cytometry (CD63 and CD81)	-	-	Familial hypercholesterolaemia (with a cardiovascular event)	Plasma-derived exosomes	miR-200c	+	-	-	-	0.011	Mann-Whitney test	TaqMan array	42	30	64 ± 2	52 ± 3	0.69	0.4	-	-	-
32061123	Escate, R., Padró, T., et al. 2020	Human	Filtration	Plasma	-	Nanoparticle tracking analysis and flow cytometry (CD63 and CD81)	-	-	Familial hypercholesterolaemia (with a cardiovascular event)	Plasma-derived exosomes	miR-324-5p	+	-	-	-	0.025	Mann-Whitney test	TaqMan array	42	30	64 ± 2	52 ± 3	0.69	0.4	-	-	-
32061123	Escate, R., Padró, T., et al. 2020	Human	Filtration	Plasma	-	Nanoparticle tracking analysis and flow cytometry (CD63 and CD81)	-	-	Familial hypercholesterolaemia (with a cardiovascular event)	Plasma-derived exosomes	miR-339-3p	+	-	-	-	0.05	Mann-Whitney test	TaqMan array	42	30	64 ± 2	52 ± 3	0.69	0.4	-	-	-
32061123	Escate, R., Padró, T., et al. 2020	Human	Filtration	Plasma	-	Nanoparticle tracking analysis and flow cytometry (CD63 and CD81)	-	-	Familial hypercholesterolaemia (with a cardiovascular event)	Plasma-derived exosomes	miR-425-5p	+	-	-	-	0.033	Mann-Whitney test	TaqMan array	42	30	64 ± 2	52 ± 3	0.69	0.4	-	-	-
32061123	Escate, R., Padró, T., et al. 2020	Human	Filtration	Plasma	-	Nanoparticle tracking analysis and flow cytometry (CD63 and CD81)	-	-	Familial hypercholesterolaemia (with a cardiovascular event)	Plasma-derived exosomes	miR-660	+	-	-	-	0.037	Mann-Whitney test	TaqMan array	42	30	64 ± 2	52 ± 3	0.69	0.4	-	-	-
32061123	Escate, R., Padró, T., et al. 2020	Human	Filtration	Plasma	-	Nanoparticle tracking analysis and flow cytometry (CD63 and CD81)	-	-	Familial hypercholesterolaemia (with a cardiovascular event)	Plasma-derived exosomes	miR-744	+	-	-	-	0.031	Mann-Whitney test	TaqMan array	42	30	64 ± 2	52 ± 3	0.69	0.4	-	-	-
32061123	Escate, R., Padró, T., et al. 2020	Human	Filtration	Plasma	-	Nanoparticle tracking analysis and flow cytometry (CD63 and CD81)	-	-	Familial hypercholesterolaemia (with a cardiovascular event)	Plasma-derived exosomes	miR-122	-	-	-	-	0.014	Mann-Whitney test	TaqMan array	42	30	64 ± 2	52 ± 3	0.69	0.4	-	-	-
31434696	Wang, Y., Jin, P., et al. 2019	Human	-	Plasma	-	-	-	-	Obesity	Plasma-derived exosomes	miR-122	+	-	-	2.24	< 0,001	Student's t-test	RT-PCR	23	29	-	-	-	-	-	We recruited 52 individuals with 29 lean (BMI<23) and 23 obese (BMI>28). The experimental protocol was approved by human ethics committee of Wenzhou Medical University.	-
31331349	Kim, H., Bae, Y.U., et al. 2019	Human	ExoQuick Exosome Precipitation Solution	Serum	-	-	-	Supernatants, obtained after the centrifugation (3000×g for 15 min) of serum samples, were mixed with the ExoQuick reagent and incubated for 30 min at 4 °C. After another centrifugation at 1500×g for 30 min the supernatant was aspirated and the pellet retained. After resuspension of the pellet in sterile phosphate- buffered saline, the RNA was extracted using a miRNeasy Mini Kit (Qiagen, Hilden, …	Type 2 diabetes (T2D)	Serum-derived exosomes	miR-122-5p	+	-	-	7.88099	-	one-way ANOVA; Bonferroni's post hoc analysis	Next-generation sequencing (NGS)	33	18	49,2 ± 14,0	38,6 ± 8,0	0.545	0.278	-	DM was defined according to World Health Organization criteria: fasting glucose ≥ 126 mg/dL, serum glucose ≥ 200 mg/dL after a 2 h oral glucose tolerance test, or a glycated hemoglobin (HbA1c) level ≥ 6.5%.	Diabetic patients with an estimated glomerular filtration rate (eGFR) < 60 mL/min/1.73 m2 were not included in the study, because we focused on early DN.
31331349	Kim, H., Bae, Y.U., et al. 2019	Human	ExoQuick Exosome Precipitation Solution	Serum	-	-	-	Supernatants, obtained after the centrifugation (3000×g for 15 min) of serum samples, were mixed with the ExoQuick reagent and incubated for 30 min at 4 °C. After another centrifugation at 1500×g for 30 min the supernatant was aspirated and the pellet retained. After resuspension of the pellet in sterile phosphate- buffered saline, the RNA was extracted using a miRNeasy Mini Kit (Qiagen, Hilden, …	Type 2 diabetes (T2D)	Serum-derived exosomes	let-7a-3p	+	-	-	5.85852	-	one-way ANOVA; Bonferroni's post hoc analysis	Next-generation sequencing (NGS)	33	18	49,2 ± 14,0	38,6 ± 8,0	0.545	0.278	-	DM was defined according to World Health Organization criteria: fasting glucose ≥ 126 mg/dL, serum glucose ≥ 200 mg/dL after a 2 h oral glucose tolerance test, or a glycated hemoglobin (HbA1c) level ≥ 6.5%.	Diabetic patients with an estimated glomerular filtration rate (eGFR) < 60 mL/min/1.73 m2 were not included in the study, because we focused on early DN.
31331349	Kim, H., Bae, Y.U., et al. 2019	Human	ExoQuick Exosome Precipitation Solution	Serum	-	-	-	Supernatants, obtained after the centrifugation (3000×g for 15 min) of serum samples, were mixed with the ExoQuick reagent and incubated for 30 min at 4 °C. After another centrifugation at 1500×g for 30 min the supernatant was aspirated and the pellet retained. After resuspension of the pellet in sterile phosphate- buffered saline, the RNA was extracted using a miRNeasy Mini Kit (Qiagen, Hilden, …	Type 2 diabetes (T2D)	Serum-derived exosomes	miR-26b-3p	+	-	-	5.77558	-	one-way ANOVA; Bonferroni's post hoc analysis	Next-generation sequencing (NGS)	33	18	49,2 ± 14,0	38,6 ± 8,0	0.545	0.278	-	DM was defined according to World Health Organization criteria: fasting glucose ≥ 126 mg/dL, serum glucose ≥ 200 mg/dL after a 2 h oral glucose tolerance test, or a glycated hemoglobin (HbA1c) level ≥ 6.5%.	Diabetic patients with an estimated glomerular filtration rate (eGFR) < 60 mL/min/1.73 m2 were not included in the study, because we focused on early DN.
31331349	Kim, H., Bae, Y.U., et al. 2019	Human	ExoQuick Exosome Precipitation Solution	Serum	-	-	-	Supernatants, obtained after the centrifugation (3000×g for 15 min) of serum samples, were mixed with the ExoQuick reagent and incubated for 30 min at 4 °C. After another centrifugation at 1500×g for 30 min the supernatant was aspirated and the pellet retained. After resuspension of the pellet in sterile phosphate- buffered saline, the RNA was extracted using a miRNeasy Mini Kit (Qiagen, Hilden, …	Type 2 diabetes (T2D)	Serum-derived exosomes	miR-193b-5p	+	-	-	5.50406	-	one-way ANOVA; Bonferroni's post hoc analysis	Next-generation sequencing (NGS)	33	18	49,2 ± 14,0	38,6 ± 8,0	0.545	0.278	-	DM was defined according to World Health Organization criteria: fasting glucose ≥ 126 mg/dL, serum glucose ≥ 200 mg/dL after a 2 h oral glucose tolerance test, or a glycated hemoglobin (HbA1c) level ≥ 6.5%.	Diabetic patients with an estimated glomerular filtration rate (eGFR) < 60 mL/min/1.73 m2 were not included in the study, because we focused on early DN.
31331349	Kim, H., Bae, Y.U., et al. 2019	Human	ExoQuick Exosome Precipitation Solution	Serum	-	-	-	Supernatants, obtained after the centrifugation (3000×g for 15 min) of serum samples, were mixed with the ExoQuick reagent and incubated for 30 min at 4 °C. After another centrifugation at 1500×g for 30 min the supernatant was aspirated and the pellet retained. After resuspension of the pellet in sterile phosphate- buffered saline, the RNA was extracted using a miRNeasy Mini Kit (Qiagen, Hilden, …	Type 2 diabetes (T2D)	Serum-derived exosomes	miR-4532	+	-	-	5.03163	-	one-way ANOVA; Bonferroni's post hoc analysis	Next-generation sequencing (NGS)	33	18	49,2 ± 14,0	38,6 ± 8,0	0.545	0.278	-	DM was defined according to World Health Organization criteria: fasting glucose ≥ 126 mg/dL, serum glucose ≥ 200 mg/dL after a 2 h oral glucose tolerance test, or a glycated hemoglobin (HbA1c) level ≥ 6.5%.	Diabetic patients with an estimated glomerular filtration rate (eGFR) < 60 mL/min/1.73 m2 were not included in the study, because we focused on early DN.
31331349	Kim, H., Bae, Y.U., et al. 2019	Human	ExoQuick Exosome Precipitation Solution	Serum	-	-	-	Supernatants, obtained after the centrifugation (3000×g for 15 min) of serum samples, were mixed with the ExoQuick reagent and incubated for 30 min at 4 °C. After another centrifugation at 1500×g for 30 min the supernatant was aspirated and the pellet retained. After resuspension of the pellet in sterile phosphate- buffered saline, the RNA was extracted using a miRNeasy Mini Kit (Qiagen, Hilden, …	Type 2 diabetes (T2D)	Serum-derived exosomes	miR-432-5p	+	-	-	4.85696	-	one-way ANOVA; Bonferroni's post hoc analysis	Next-generation sequencing (NGS)	33	18	49,2 ± 14,0	38,6 ± 8,0	0.545	0.278	-	DM was defined according to World Health Organization criteria: fasting glucose ≥ 126 mg/dL, serum glucose ≥ 200 mg/dL after a 2 h oral glucose tolerance test, or a glycated hemoglobin (HbA1c) level ≥ 6.5%.	Diabetic patients with an estimated glomerular filtration rate (eGFR) < 60 mL/min/1.73 m2 were not included in the study, because we focused on early DN.
31331349	Kim, H., Bae, Y.U., et al. 2019	Human	ExoQuick Exosome Precipitation Solution	Serum	-	-	-	Supernatants, obtained after the centrifugation (3000×g for 15 min) of serum samples, were mixed with the ExoQuick reagent and incubated for 30 min at 4 °C. After another centrifugation at 1500×g for 30 min the supernatant was aspirated and the pellet retained. After resuspension of the pellet in sterile phosphate- buffered saline, the RNA was extracted using a miRNeasy Mini Kit (Qiagen, Hilden, …	Type 2 diabetes (T2D)	Serum-derived exosomes	let-7f-1-3p	+	-	-	4.38885	-	one-way ANOVA; Bonferroni's post hoc analysis	Next-generation sequencing (NGS)	33	18	49,2 ± 14,0	38,6 ± 8,0	0.545	0.278	-	DM was defined according to World Health Organization criteria: fasting glucose ≥ 126 mg/dL, serum glucose ≥ 200 mg/dL after a 2 h oral glucose tolerance test, or a glycated hemoglobin (HbA1c) level ≥ 6.5%.	Diabetic patients with an estimated glomerular filtration rate (eGFR) < 60 mL/min/1.73 m2 were not included in the study, because we focused on early DN.
31331349	Kim, H., Bae, Y.U., et al. 2019	Human	ExoQuick Exosome Precipitation Solution	Serum	-	-	-	Supernatants, obtained after the centrifugation (3000×g for 15 min) of serum samples, were mixed with the ExoQuick reagent and incubated for 30 min at 4 °C. After another centrifugation at 1500×g for 30 min the supernatant was aspirated and the pellet retained. After resuspension of the pellet in sterile phosphate- buffered saline, the RNA was extracted using a miRNeasy Mini Kit (Qiagen, Hilden, …	Type 2 diabetes (T2D)	Serum-derived exosomes	miR-183-5p	+	-	-	4.32318	-	one-way ANOVA; Bonferroni's post hoc analysis	Next-generation sequencing (NGS)	33	18	49,2 ± 14,0	38,6 ± 8,0	0.545	0.278	-	DM was defined according to World Health Organization criteria: fasting glucose ≥ 126 mg/dL, serum glucose ≥ 200 mg/dL after a 2 h oral glucose tolerance test, or a glycated hemoglobin (HbA1c) level ≥ 6.5%.	Diabetic patients with an estimated glomerular filtration rate (eGFR) < 60 mL/min/1.73 m2 were not included in the study, because we focused on early DN.
31331349	Kim, H., Bae, Y.U., et al. 2019	Human	ExoQuick Exosome Precipitation Solution	Serum	-	-	-	Supernatants, obtained after the centrifugation (3000×g for 15 min) of serum samples, were mixed with the ExoQuick reagent and incubated for 30 min at 4 °C. After another centrifugation at 1500×g for 30 min the supernatant was aspirated and the pellet retained. After resuspension of the pellet in sterile phosphate- buffered saline, the RNA was extracted using a miRNeasy Mini Kit (Qiagen, Hilden, …	Type 2 diabetes (T2D)	Serum-derived exosomes	miR-3656	+	-	-	4.15007	-	one-way ANOVA; Bonferroni's post hoc analysis	Next-generation sequencing (NGS)	33	18	49,2 ± 14,0	38,6 ± 8,0	0.545	0.278	-	DM was defined according to World Health Organization criteria: fasting glucose ≥ 126 mg/dL, serum glucose ≥ 200 mg/dL after a 2 h oral glucose tolerance test, or a glycated hemoglobin (HbA1c) level ≥ 6.5%.	Diabetic patients with an estimated glomerular filtration rate (eGFR) < 60 mL/min/1.73 m2 were not included in the study, because we focused on early DN.
31331349	Kim, H., Bae, Y.U., et al. 2019	Human	ExoQuick Exosome Precipitation Solution	Serum	-	-	-	Supernatants, obtained after the centrifugation (3000×g for 15 min) of serum samples, were mixed with the ExoQuick reagent and incubated for 30 min at 4 °C. After another centrifugation at 1500×g for 30 min the supernatant was aspirated and the pellet retained. After resuspension of the pellet in sterile phosphate- buffered saline, the RNA was extracted using a miRNeasy Mini Kit (Qiagen, Hilden, …	Type 2 diabetes (T2D)	Serum-derived exosomes	miR-340-3p	+	-	-	3.98246	-	one-way ANOVA; Bonferroni's post hoc analysis	Next-generation sequencing (NGS)	33	18	49,2 ± 14,0	38,6 ± 8,0	0.545	0.278	-	DM was defined according to World Health Organization criteria: fasting glucose ≥ 126 mg/dL, serum glucose ≥ 200 mg/dL after a 2 h oral glucose tolerance test, or a glycated hemoglobin (HbA1c) level ≥ 6.5%.	Diabetic patients with an estimated glomerular filtration rate (eGFR) < 60 mL/min/1.73 m2 were not included in the study, because we focused on early DN.
31331349	Kim, H., Bae, Y.U., et al. 2019	Human	ExoQuick Exosome Precipitation Solution	Serum	-	-	-	Supernatants, obtained after the centrifugation (3000×g for 15 min) of serum samples, were mixed with the ExoQuick reagent and incubated for 30 min at 4 °C. After another centrifugation at 1500×g for 30 min the supernatant was aspirated and the pellet retained. After resuspension of the pellet in sterile phosphate- buffered saline, the RNA was extracted using a miRNeasy Mini Kit (Qiagen, Hilden, …	Type 2 diabetes (T2D)	Serum-derived exosomes	miR-6751-3p	-	-	-	-59.2142	-	one-way ANOVA; Bonferroni's post hoc analysis	Next-generation sequencing (NGS)	33	18	49,2 ± 14,0	38,6 ± 8,0	0.545	0.278	-	DM was defined according to World Health Organization criteria: fasting glucose ≥ 126 mg/dL, serum glucose ≥ 200 mg/dL after a 2 h oral glucose tolerance test, or a glycated hemoglobin (HbA1c) level ≥ 6.5%.	Diabetic patients with an estimated glomerular filtration rate (eGFR) < 60 mL/min/1.73 m2 were not included in the study, because we focused on early DN.
31331349	Kim, H., Bae, Y.U., et al. 2019	Human	ExoQuick Exosome Precipitation Solution	Serum	-	-	-	Supernatants, obtained after the centrifugation (3000×g for 15 min) of serum samples, were mixed with the ExoQuick reagent and incubated for 30 min at 4 °C. After another centrifugation at 1500×g for 30 min the supernatant was aspirated and the pellet retained. After resuspension of the pellet in sterile phosphate- buffered saline, the RNA was extracted using a miRNeasy Mini Kit (Qiagen, Hilden, …	Type 2 diabetes (T2D)	Serum-derived exosomes	miR-1273a	-	-	-	-41.8258	-	one-way ANOVA; Bonferroni's post hoc analysis	Next-generation sequencing (NGS)	33	18	49,2 ± 14,0	38,6 ± 8,0	0.545	0.278	-	DM was defined according to World Health Organization criteria: fasting glucose ≥ 126 mg/dL, serum glucose ≥ 200 mg/dL after a 2 h oral glucose tolerance test, or a glycated hemoglobin (HbA1c) level ≥ 6.5%.	Diabetic patients with an estimated glomerular filtration rate (eGFR) < 60 mL/min/1.73 m2 were not included in the study, because we focused on early DN.
31331349	Kim, H., Bae, Y.U., et al. 2019	Human	ExoQuick Exosome Precipitation Solution	Serum	-	-	-	Supernatants, obtained after the centrifugation (3000×g for 15 min) of serum samples, were mixed with the ExoQuick reagent and incubated for 30 min at 4 °C. After another centrifugation at 1500×g for 30 min the supernatant was aspirated and the pellet retained. After resuspension of the pellet in sterile phosphate- buffered saline, the RNA was extracted using a miRNeasy Mini Kit (Qiagen, Hilden, …	Type 2 diabetes (T2D)	Serum-derived exosomes	miR-4484	-	-	-	-18.9096	-	one-way ANOVA; Bonferroni's post hoc analysis	Next-generation sequencing (NGS)	33	18	49,2 ± 14,0	38,6 ± 8,0	0.545	0.278	-	DM was defined according to World Health Organization criteria: fasting glucose ≥ 126 mg/dL, serum glucose ≥ 200 mg/dL after a 2 h oral glucose tolerance test, or a glycated hemoglobin (HbA1c) level ≥ 6.5%.	Diabetic patients with an estimated glomerular filtration rate (eGFR) < 60 mL/min/1.73 m2 were not included in the study, because we focused on early DN.
31331349	Kim, H., Bae, Y.U., et al. 2019	Human	ExoQuick Exosome Precipitation Solution	Serum	-	-	-	Supernatants, obtained after the centrifugation (3000×g for 15 min) of serum samples, were mixed with the ExoQuick reagent and incubated for 30 min at 4 °C. After another centrifugation at 1500×g for 30 min the supernatant was aspirated and the pellet retained. After resuspension of the pellet in sterile phosphate- buffered saline, the RNA was extracted using a miRNeasy Mini Kit (Qiagen, Hilden, …	Type 2 diabetes (T2D)	Serum-derived exosomes	miR-8485	-	-	-	-14.5725	-	one-way ANOVA; Bonferroni's post hoc analysis	Next-generation sequencing (NGS)	33	18	49,2 ± 14,0	38,6 ± 8,0	0.545	0.278	-	DM was defined according to World Health Organization criteria: fasting glucose ≥ 126 mg/dL, serum glucose ≥ 200 mg/dL after a 2 h oral glucose tolerance test, or a glycated hemoglobin (HbA1c) level ≥ 6.5%.	Diabetic patients with an estimated glomerular filtration rate (eGFR) < 60 mL/min/1.73 m2 were not included in the study, because we focused on early DN.
31331349	Kim, H., Bae, Y.U., et al. 2019	Human	ExoQuick Exosome Precipitation Solution	Serum	-	-	-	Supernatants, obtained after the centrifugation (3000×g for 15 min) of serum samples, were mixed with the ExoQuick reagent and incubated for 30 min at 4 °C. After another centrifugation at 1500×g for 30 min the supernatant was aspirated and the pellet retained. After resuspension of the pellet in sterile phosphate- buffered saline, the RNA was extracted using a miRNeasy Mini Kit (Qiagen, Hilden, …	Type 2 diabetes (T2D)	Serum-derived exosomes	miR-4644	-	-	-	-12.1962	-	one-way ANOVA; Bonferroni's post hoc analysis	Next-generation sequencing (NGS)	33	18	49,2 ± 14,0	38,6 ± 8,0	0.545	0.278	-	DM was defined according to World Health Organization criteria: fasting glucose ≥ 126 mg/dL, serum glucose ≥ 200 mg/dL after a 2 h oral glucose tolerance test, or a glycated hemoglobin (HbA1c) level ≥ 6.5%.	Diabetic patients with an estimated glomerular filtration rate (eGFR) < 60 mL/min/1.73 m2 were not included in the study, because we focused on early DN.
31331349	Kim, H., Bae, Y.U., et al. 2019	Human	ExoQuick Exosome Precipitation Solution	Serum	-	-	-	Supernatants, obtained after the centrifugation (3000×g for 15 min) of serum samples, were mixed with the ExoQuick reagent and incubated for 30 min at 4 °C. After another centrifugation at 1500×g for 30 min the supernatant was aspirated and the pellet retained. After resuspension of the pellet in sterile phosphate- buffered saline, the RNA was extracted using a miRNeasy Mini Kit (Qiagen, Hilden, …	Type 2 diabetes (T2D)	Serum-derived exosomes	miR-1273g-3p	-	-	-	-10.2792	-	one-way ANOVA; Bonferroni's post hoc analysis	Next-generation sequencing (NGS)	33	18	49,2 ± 14,0	38,6 ± 8,0	0.545	0.278	-	DM was defined according to World Health Organization criteria: fasting glucose ≥ 126 mg/dL, serum glucose ≥ 200 mg/dL after a 2 h oral glucose tolerance test, or a glycated hemoglobin (HbA1c) level ≥ 6.5%.	Diabetic patients with an estimated glomerular filtration rate (eGFR) < 60 mL/min/1.73 m2 were not included in the study, because we focused on early DN.
31331349	Kim, H., Bae, Y.U., et al. 2019	Human	ExoQuick Exosome Precipitation Solution	Serum	-	-	-	Supernatants, obtained after the centrifugation (3000×g for 15 min) of serum samples, were mixed with the ExoQuick reagent and incubated for 30 min at 4 °C. After another centrifugation at 1500×g for 30 min the supernatant was aspirated and the pellet retained. After resuspension of the pellet in sterile phosphate- buffered saline, the RNA was extracted using a miRNeasy Mini Kit (Qiagen, Hilden, …	Type 2 diabetes (T2D)	Serum-derived exosomes	miR-4271	-	-	-	-9.6317	-	one-way ANOVA; Bonferroni's post hoc analysis	Next-generation sequencing (NGS)	33	18	49,2 ± 14,0	38,6 ± 8,0	0.545	0.278	-	DM was defined according to World Health Organization criteria: fasting glucose ≥ 126 mg/dL, serum glucose ≥ 200 mg/dL after a 2 h oral glucose tolerance test, or a glycated hemoglobin (HbA1c) level ≥ 6.5%.	Diabetic patients with an estimated glomerular filtration rate (eGFR) < 60 mL/min/1.73 m2 were not included in the study, because we focused on early DN.
31331349	Kim, H., Bae, Y.U., et al. 2019	Human	ExoQuick Exosome Precipitation Solution	Serum	-	-	-	Supernatants, obtained after the centrifugation (3000×g for 15 min) of serum samples, were mixed with the ExoQuick reagent and incubated for 30 min at 4 °C. After another centrifugation at 1500×g for 30 min the supernatant was aspirated and the pellet retained. After resuspension of the pellet in sterile phosphate- buffered saline, the RNA was extracted using a miRNeasy Mini Kit (Qiagen, Hilden, …	Type 2 diabetes (T2D)	Serum-derived exosomes	miR-7847-3p	-	-	-	-9.43479	-	one-way ANOVA; Bonferroni's post hoc analysis	Next-generation sequencing (NGS)	33	18	49,2 ± 14,0	38,6 ± 8,0	0.545	0.278	-	DM was defined according to World Health Organization criteria: fasting glucose ≥ 126 mg/dL, serum glucose ≥ 200 mg/dL after a 2 h oral glucose tolerance test, or a glycated hemoglobin (HbA1c) level ≥ 6.5%.	Diabetic patients with an estimated glomerular filtration rate (eGFR) < 60 mL/min/1.73 m2 were not included in the study, because we focused on early DN.
31331349	Kim, H., Bae, Y.U., et al. 2019	Human	ExoQuick Exosome Precipitation Solution	Serum	-	-	-	Supernatants, obtained after the centrifugation (3000×g for 15 min) of serum samples, were mixed with the ExoQuick reagent and incubated for 30 min at 4 °C. After another centrifugation at 1500×g for 30 min the supernatant was aspirated and the pellet retained. After resuspension of the pellet in sterile phosphate- buffered saline, the RNA was extracted using a miRNeasy Mini Kit (Qiagen, Hilden, …	Type 2 diabetes (T2D)	Serum-derived exosomes	miR-4461	-	-	-	-7.70758	-	one-way ANOVA; Bonferroni's post hoc analysis	Next-generation sequencing (NGS)	33	18	49,2 ± 14,0	38,6 ± 8,0	0.545	0.278	-	DM was defined according to World Health Organization criteria: fasting glucose ≥ 126 mg/dL, serum glucose ≥ 200 mg/dL after a 2 h oral glucose tolerance test, or a glycated hemoglobin (HbA1c) level ≥ 6.5%.	Diabetic patients with an estimated glomerular filtration rate (eGFR) < 60 mL/min/1.73 m2 were not included in the study, because we focused on early DN.
31331349	Kim, H., Bae, Y.U., et al. 2019	Human	ExoQuick Exosome Precipitation Solution	Serum	-	-	-	Supernatants, obtained after the centrifugation (3000×g for 15 min) of serum samples, were mixed with the ExoQuick reagent and incubated for 30 min at 4 °C. After another centrifugation at 1500×g for 30 min the supernatant was aspirated and the pellet retained. After resuspension of the pellet in sterile phosphate- buffered saline, the RNA was extracted using a miRNeasy Mini Kit (Qiagen, Hilden, …	Type 2 diabetes (T2D)	Serum-derived exosomes	miR-6885-5p	-	-	-	-7.17415	-	one-way ANOVA; Bonferroni's post hoc analysis	Next-generation sequencing (NGS)	33	18	49,2 ± 14,0	38,6 ± 8,0	0.545	0.278	-	DM was defined according to World Health Organization criteria: fasting glucose ≥ 126 mg/dL, serum glucose ≥ 200 mg/dL after a 2 h oral glucose tolerance test, or a glycated hemoglobin (HbA1c) level ≥ 6.5%.	Diabetic patients with an estimated glomerular filtration rate (eGFR) < 60 mL/min/1.73 m2 were not included in the study, because we focused on early DN.
31331349	Kim, H., Bae, Y.U., et al. 2019	Human	ExoQuick Exosome Precipitation Solution	Serum	-	-	-	Supernatants, obtained after the centrifugation (3000×g for 15 min) of serum samples, were mixed with the ExoQuick reagent and incubated for 30 min at 4 °C. After another centrifugation at 1500×g for 30 min the supernatant was aspirated and the pellet retained. After resuspension of the pellet in sterile phosphate- buffered saline, the RNA was extracted using a miRNeasy Mini Kit (Qiagen, Hilden, …	Diabetic nephropathy	Serum-derived exosomes	miR-122-5p	+	-	-	8.26922	-	one-way ANOVA; Bonferroni's post hoc analysis	Next-generation sequencing (NGS)	25	18	47,6 ± 14,7	38,6 ± 8,0	0.565	0.278	-	Patients with DN were defined as those who had history of DM and had showed micro- or macro-albuminuria (24-h urine albumin ≥ 30 mg/day or a spot urine albumin-to creatinine ratio ≥ 30 mg/g) on at least three consecutive measurements.	Diabetic patients with an estimated glomerular filtration rate (eGFR) < 60 mL/min/1.73 m2 were not included in the study, because we focused on early DN.
31331349	Kim, H., Bae, Y.U., et al. 2019	Human	ExoQuick Exosome Precipitation Solution	Serum	-	-	-	Supernatants, obtained after the centrifugation (3000×g for 15 min) of serum samples, were mixed with the ExoQuick reagent and incubated for 30 min at 4 °C. After another centrifugation at 1500×g for 30 min the supernatant was aspirated and the pellet retained. After resuspension of the pellet in sterile phosphate- buffered saline, the RNA was extracted using a miRNeasy Mini Kit (Qiagen, Hilden, …	Diabetic nephropathy	Serum-derived exosomes	miR-432-5p	+	-	-	6.67043	-	one-way ANOVA; Bonferroni's post hoc analysis	Next-generation sequencing (NGS)	25	18	47,6 ± 14,7	38,6 ± 8,0	0.565	0.278	-	Patients with DN were defined as those who had history of DM and had showed micro- or macro-albuminuria (24-h urine albumin ≥ 30 mg/day or a spot urine albumin-to creatinine ratio ≥ 30 mg/g) on at least three consecutive measurements.	Diabetic patients with an estimated glomerular filtration rate (eGFR) < 60 mL/min/1.73 m2 were not included in the study, because we focused on early DN.
31331349	Kim, H., Bae, Y.U., et al. 2019	Human	ExoQuick Exosome Precipitation Solution	Serum	-	-	-	Supernatants, obtained after the centrifugation (3000×g for 15 min) of serum samples, were mixed with the ExoQuick reagent and incubated for 30 min at 4 °C. After another centrifugation at 1500×g for 30 min the supernatant was aspirated and the pellet retained. After resuspension of the pellet in sterile phosphate- buffered saline, the RNA was extracted using a miRNeasy Mini Kit (Qiagen, Hilden, …	Diabetic nephropathy	Serum-derived exosomes	miR-193b-5p	+	-	-	5.79087	-	one-way ANOVA; Bonferroni's post hoc analysis	Next-generation sequencing (NGS)	25	18	47,6 ± 14,7	38,6 ± 8,0	0.565	0.278	-	Patients with DN were defined as those who had history of DM and had showed micro- or macro-albuminuria (24-h urine albumin ≥ 30 mg/day or a spot urine albumin-to creatinine ratio ≥ 30 mg/g) on at least three consecutive measurements.	Diabetic patients with an estimated glomerular filtration rate (eGFR) < 60 mL/min/1.73 m2 were not included in the study, because we focused on early DN.
31331349	Kim, H., Bae, Y.U., et al. 2019	Human	ExoQuick Exosome Precipitation Solution	Serum	-	-	-	Supernatants, obtained after the centrifugation (3000×g for 15 min) of serum samples, were mixed with the ExoQuick reagent and incubated for 30 min at 4 °C. After another centrifugation at 1500×g for 30 min the supernatant was aspirated and the pellet retained. After resuspension of the pellet in sterile phosphate- buffered saline, the RNA was extracted using a miRNeasy Mini Kit (Qiagen, Hilden, …	Diabetic nephropathy	Serum-derived exosomes	miR-3656	+	-	-	5.09602	-	one-way ANOVA; Bonferroni's post hoc analysis	Next-generation sequencing (NGS)	25	18	47,6 ± 14,7	38,6 ± 8,0	0.565	0.278	-	Patients with DN were defined as those who had history of DM and had showed micro- or macro-albuminuria (24-h urine albumin ≥ 30 mg/day or a spot urine albumin-to creatinine ratio ≥ 30 mg/g) on at least three consecutive measurements.	Diabetic patients with an estimated glomerular filtration rate (eGFR) < 60 mL/min/1.73 m2 were not included in the study, because we focused on early DN.
31331349	Kim, H., Bae, Y.U., et al. 2019	Human	ExoQuick Exosome Precipitation Solution	Serum	-	-	-	Supernatants, obtained after the centrifugation (3000×g for 15 min) of serum samples, were mixed with the ExoQuick reagent and incubated for 30 min at 4 °C. After another centrifugation at 1500×g for 30 min the supernatant was aspirated and the pellet retained. After resuspension of the pellet in sterile phosphate- buffered saline, the RNA was extracted using a miRNeasy Mini Kit (Qiagen, Hilden, …	Diabetic nephropathy	Serum-derived exosomes	miR-6087	+	-	-	5.04505	-	one-way ANOVA; Bonferroni's post hoc analysis	Next-generation sequencing (NGS)	25	18	47,6 ± 14,7	38,6 ± 8,0	0.565	0.278	-	Patients with DN were defined as those who had history of DM and had showed micro- or macro-albuminuria (24-h urine albumin ≥ 30 mg/day or a spot urine albumin-to creatinine ratio ≥ 30 mg/g) on at least three consecutive measurements.	Diabetic patients with an estimated glomerular filtration rate (eGFR) < 60 mL/min/1.73 m2 were not included in the study, because we focused on early DN.
31331349	Kim, H., Bae, Y.U., et al. 2019	Human	ExoQuick Exosome Precipitation Solution	Serum	-	-	-	Supernatants, obtained after the centrifugation (3000×g for 15 min) of serum samples, were mixed with the ExoQuick reagent and incubated for 30 min at 4 °C. After another centrifugation at 1500×g for 30 min the supernatant was aspirated and the pellet retained. After resuspension of the pellet in sterile phosphate- buffered saline, the RNA was extracted using a miRNeasy Mini Kit (Qiagen, Hilden, …	Diabetic nephropathy	Serum-derived exosomes	miR-4488	+	-	-	4.44244	-	one-way ANOVA; Bonferroni's post hoc analysis	Next-generation sequencing (NGS)	25	18	47,6 ± 14,7	38,6 ± 8,0	0.565	0.278	-	Patients with DN were defined as those who had history of DM and had showed micro- or macro-albuminuria (24-h urine albumin ≥ 30 mg/day or a spot urine albumin-to creatinine ratio ≥ 30 mg/g) on at least three consecutive measurements.	Diabetic patients with an estimated glomerular filtration rate (eGFR) < 60 mL/min/1.73 m2 were not included in the study, because we focused on early DN.
31331349	Kim, H., Bae, Y.U., et al. 2019	Human	ExoQuick Exosome Precipitation Solution	Serum	-	-	-	Supernatants, obtained after the centrifugation (3000×g for 15 min) of serum samples, were mixed with the ExoQuick reagent and incubated for 30 min at 4 °C. After another centrifugation at 1500×g for 30 min the supernatant was aspirated and the pellet retained. After resuspension of the pellet in sterile phosphate- buffered saline, the RNA was extracted using a miRNeasy Mini Kit (Qiagen, Hilden, …	Diabetic nephropathy	Serum-derived exosomes	miR-26b-3p	+	-	-	4.43742	-	one-way ANOVA; Bonferroni's post hoc analysis	Next-generation sequencing (NGS)	25	18	47,6 ± 14,7	38,6 ± 8,0	0.565	0.278	-	Patients with DN were defined as those who had history of DM and had showed micro- or macro-albuminuria (24-h urine albumin ≥ 30 mg/day or a spot urine albumin-to creatinine ratio ≥ 30 mg/g) on at least three consecutive measurements.	Diabetic patients with an estimated glomerular filtration rate (eGFR) < 60 mL/min/1.73 m2 were not included in the study, because we focused on early DN.
31331349	Kim, H., Bae, Y.U., et al. 2019	Human	ExoQuick Exosome Precipitation Solution	Serum	-	-	-	Supernatants, obtained after the centrifugation (3000×g for 15 min) of serum samples, were mixed with the ExoQuick reagent and incubated for 30 min at 4 °C. After another centrifugation at 1500×g for 30 min the supernatant was aspirated and the pellet retained. After resuspension of the pellet in sterile phosphate- buffered saline, the RNA was extracted using a miRNeasy Mini Kit (Qiagen, Hilden, …	Diabetic nephropathy	Serum-derived exosomes	miR-23a-5p	+	-	-	4.30709	-	one-way ANOVA; Bonferroni's post hoc analysis	Next-generation sequencing (NGS)	25	18	47,6 ± 14,7	38,6 ± 8,0	0.565	0.278	-	Patients with DN were defined as those who had history of DM and had showed micro- or macro-albuminuria (24-h urine albumin ≥ 30 mg/day or a spot urine albumin-to creatinine ratio ≥ 30 mg/g) on at least three consecutive measurements.	Diabetic patients with an estimated glomerular filtration rate (eGFR) < 60 mL/min/1.73 m2 were not included in the study, because we focused on early DN.
31331349	Kim, H., Bae, Y.U., et al. 2019	Human	ExoQuick Exosome Precipitation Solution	Serum	-	-	-	Supernatants, obtained after the centrifugation (3000×g for 15 min) of serum samples, were mixed with the ExoQuick reagent and incubated for 30 min at 4 °C. After another centrifugation at 1500×g for 30 min the supernatant was aspirated and the pellet retained. After resuspension of the pellet in sterile phosphate- buffered saline, the RNA was extracted using a miRNeasy Mini Kit (Qiagen, Hilden, …	Diabetic nephropathy	Serum-derived exosomes	miR-4532	+	-	-	4.22222	-	one-way ANOVA; Bonferroni's post hoc analysis	Next-generation sequencing (NGS)	25	18	47,6 ± 14,7	38,6 ± 8,0	0.565	0.278	-	Patients with DN were defined as those who had history of DM and had showed micro- or macro-albuminuria (24-h urine albumin ≥ 30 mg/day or a spot urine albumin-to creatinine ratio ≥ 30 mg/g) on at least three consecutive measurements.	Diabetic patients with an estimated glomerular filtration rate (eGFR) < 60 mL/min/1.73 m2 were not included in the study, because we focused on early DN.
31331349	Kim, H., Bae, Y.U., et al. 2019	Human	ExoQuick Exosome Precipitation Solution	Serum	-	-	-	Supernatants, obtained after the centrifugation (3000×g for 15 min) of serum samples, were mixed with the ExoQuick reagent and incubated for 30 min at 4 °C. After another centrifugation at 1500×g for 30 min the supernatant was aspirated and the pellet retained. After resuspension of the pellet in sterile phosphate- buffered saline, the RNA was extracted using a miRNeasy Mini Kit (Qiagen, Hilden, …	Diabetic nephropathy	Serum-derived exosomes	let-7a-3p	+	-	-	4.11507	-	one-way ANOVA; Bonferroni's post hoc analysis	Next-generation sequencing (NGS)	25	18	47,6 ± 14,7	38,6 ± 8,0	0.565	0.278	-	Patients with DN were defined as those who had history of DM and had showed micro- or macro-albuminuria (24-h urine albumin ≥ 30 mg/day or a spot urine albumin-to creatinine ratio ≥ 30 mg/g) on at least three consecutive measurements.	Diabetic patients with an estimated glomerular filtration rate (eGFR) < 60 mL/min/1.73 m2 were not included in the study, because we focused on early DN.
31331349	Kim, H., Bae, Y.U., et al. 2019	Human	ExoQuick Exosome Precipitation Solution	Serum	-	-	-	Supernatants, obtained after the centrifugation (3000×g for 15 min) of serum samples, were mixed with the ExoQuick reagent and incubated for 30 min at 4 °C. After another centrifugation at 1500×g for 30 min the supernatant was aspirated and the pellet retained. After resuspension of the pellet in sterile phosphate- buffered saline, the RNA was extracted using a miRNeasy Mini Kit (Qiagen, Hilden, …	Diabetic nephropathy	Serum-derived exosomes	miR-8485	-	-	-	-34.0292	-	one-way ANOVA; Bonferroni's post hoc analysis	Next-generation sequencing (NGS)	25	18	47,6 ± 14,7	38,6 ± 8,0	0.565	0.278	-	Patients with DN were defined as those who had history of DM and had showed micro- or macro-albuminuria (24-h urine albumin ≥ 30 mg/day or a spot urine albumin-to creatinine ratio ≥ 30 mg/g) on at least three consecutive measurements.	Diabetic patients with an estimated glomerular filtration rate (eGFR) < 60 mL/min/1.73 m2 were not included in the study, because we focused on early DN.
31331349	Kim, H., Bae, Y.U., et al. 2019	Human	ExoQuick Exosome Precipitation Solution	Serum	-	-	-	Supernatants, obtained after the centrifugation (3000×g for 15 min) of serum samples, were mixed with the ExoQuick reagent and incubated for 30 min at 4 °C. After another centrifugation at 1500×g for 30 min the supernatant was aspirated and the pellet retained. After resuspension of the pellet in sterile phosphate- buffered saline, the RNA was extracted using a miRNeasy Mini Kit (Qiagen, Hilden, …	Diabetic nephropathy	Serum-derived exosomes	miR-6739-5p	-	-	-	-31.6031	-	one-way ANOVA; Bonferroni's post hoc analysis	Next-generation sequencing (NGS)	25	18	47,6 ± 14,7	38,6 ± 8,0	0.565	0.278	-	Patients with DN were defined as those who had history of DM and had showed micro- or macro-albuminuria (24-h urine albumin ≥ 30 mg/day or a spot urine albumin-to creatinine ratio ≥ 30 mg/g) on at least three consecutive measurements.	Diabetic patients with an estimated glomerular filtration rate (eGFR) < 60 mL/min/1.73 m2 were not included in the study, because we focused on early DN.
31331349	Kim, H., Bae, Y.U., et al. 2019	Human	ExoQuick Exosome Precipitation Solution	Serum	-	-	-	Supernatants, obtained after the centrifugation (3000×g for 15 min) of serum samples, were mixed with the ExoQuick reagent and incubated for 30 min at 4 °C. After another centrifugation at 1500×g for 30 min the supernatant was aspirated and the pellet retained. After resuspension of the pellet in sterile phosphate- buffered saline, the RNA was extracted using a miRNeasy Mini Kit (Qiagen, Hilden, …	Diabetic nephropathy	Serum-derived exosomes	miR-1273a	-	-	-	-23.936	-	one-way ANOVA; Bonferroni's post hoc analysis	Next-generation sequencing (NGS)	25	18	47,6 ± 14,7	38,6 ± 8,0	0.565	0.278	-	Patients with DN were defined as those who had history of DM and had showed micro- or macro-albuminuria (24-h urine albumin ≥ 30 mg/day or a spot urine albumin-to creatinine ratio ≥ 30 mg/g) on at least three consecutive measurements.	Diabetic patients with an estimated glomerular filtration rate (eGFR) < 60 mL/min/1.73 m2 were not included in the study, because we focused on early DN.
31331349	Kim, H., Bae, Y.U., et al. 2019	Human	ExoQuick Exosome Precipitation Solution	Serum	-	-	-	Supernatants, obtained after the centrifugation (3000×g for 15 min) of serum samples, were mixed with the ExoQuick reagent and incubated for 30 min at 4 °C. After another centrifugation at 1500×g for 30 min the supernatant was aspirated and the pellet retained. After resuspension of the pellet in sterile phosphate- buffered saline, the RNA was extracted using a miRNeasy Mini Kit (Qiagen, Hilden, …	Diabetic nephropathy	Serum-derived exosomes	miR-7641	-	-	-	-19.2471	-	one-way ANOVA; Bonferroni's post hoc analysis	Next-generation sequencing (NGS)	25	18	47,6 ± 14,7	38,6 ± 8,0	0.565	0.278	-	Patients with DN were defined as those who had history of DM and had showed micro- or macro-albuminuria (24-h urine albumin ≥ 30 mg/day or a spot urine albumin-to creatinine ratio ≥ 30 mg/g) on at least three consecutive measurements.	Diabetic patients with an estimated glomerular filtration rate (eGFR) < 60 mL/min/1.73 m2 were not included in the study, because we focused on early DN.
31331349	Kim, H., Bae, Y.U., et al. 2019	Human	ExoQuick Exosome Precipitation Solution	Serum	-	-	-	Supernatants, obtained after the centrifugation (3000×g for 15 min) of serum samples, were mixed with the ExoQuick reagent and incubated for 30 min at 4 °C. After another centrifugation at 1500×g for 30 min the supernatant was aspirated and the pellet retained. After resuspension of the pellet in sterile phosphate- buffered saline, the RNA was extracted using a miRNeasy Mini Kit (Qiagen, Hilden, …	Diabetic nephropathy	Serum-derived exosomes	miR-4461	-	-	-	-17.6697	-	one-way ANOVA; Bonferroni's post hoc analysis	Next-generation sequencing (NGS)	25	18	47,6 ± 14,7	38,6 ± 8,0	0.565	0.278	-	Patients with DN were defined as those who had history of DM and had showed micro- or macro-albuminuria (24-h urine albumin ≥ 30 mg/day or a spot urine albumin-to creatinine ratio ≥ 30 mg/g) on at least three consecutive measurements.	Diabetic patients with an estimated glomerular filtration rate (eGFR) < 60 mL/min/1.73 m2 were not included in the study, because we focused on early DN.
31331349	Kim, H., Bae, Y.U., et al. 2019	Human	ExoQuick Exosome Precipitation Solution	Serum	-	-	-	Supernatants, obtained after the centrifugation (3000×g for 15 min) of serum samples, were mixed with the ExoQuick reagent and incubated for 30 min at 4 °C. After another centrifugation at 1500×g for 30 min the supernatant was aspirated and the pellet retained. After resuspension of the pellet in sterile phosphate- buffered saline, the RNA was extracted using a miRNeasy Mini Kit (Qiagen, Hilden, …	Diabetic nephropathy	Serum-derived exosomes	miR-6751-3p	-	-	-	-15.3324	-	one-way ANOVA; Bonferroni's post hoc analysis	Next-generation sequencing (NGS)	25	18	47,6 ± 14,7	38,6 ± 8,0	0.565	0.278	-	Patients with DN were defined as those who had history of DM and had showed micro- or macro-albuminuria (24-h urine albumin ≥ 30 mg/day or a spot urine albumin-to creatinine ratio ≥ 30 mg/g) on at least three consecutive measurements.	Diabetic patients with an estimated glomerular filtration rate (eGFR) < 60 mL/min/1.73 m2 were not included in the study, because we focused on early DN.
31331349	Kim, H., Bae, Y.U., et al. 2019	Human	ExoQuick Exosome Precipitation Solution	Serum	-	-	-	Supernatants, obtained after the centrifugation (3000×g for 15 min) of serum samples, were mixed with the ExoQuick reagent and incubated for 30 min at 4 °C. After another centrifugation at 1500×g for 30 min the supernatant was aspirated and the pellet retained. After resuspension of the pellet in sterile phosphate- buffered saline, the RNA was extracted using a miRNeasy Mini Kit (Qiagen, Hilden, …	Diabetic nephropathy	Serum-derived exosomes	miR-4484	-	-	-	-13.6666	-	one-way ANOVA; Bonferroni's post hoc analysis	Next-generation sequencing (NGS)	25	18	47,6 ± 14,7	38,6 ± 8,0	0.565	0.278	-	Patients with DN were defined as those who had history of DM and had showed micro- or macro-albuminuria (24-h urine albumin ≥ 30 mg/day or a spot urine albumin-to creatinine ratio ≥ 30 mg/g) on at least three consecutive measurements.	Diabetic patients with an estimated glomerular filtration rate (eGFR) < 60 mL/min/1.73 m2 were not included in the study, because we focused on early DN.
31331349	Kim, H., Bae, Y.U., et al. 2019	Human	ExoQuick Exosome Precipitation Solution	Serum	-	-	-	Supernatants, obtained after the centrifugation (3000×g for 15 min) of serum samples, were mixed with the ExoQuick reagent and incubated for 30 min at 4 °C. After another centrifugation at 1500×g for 30 min the supernatant was aspirated and the pellet retained. After resuspension of the pellet in sterile phosphate- buffered saline, the RNA was extracted using a miRNeasy Mini Kit (Qiagen, Hilden, …	Diabetic nephropathy	Serum-derived exosomes	miR-7847-3p	-	-	-	-8.8404	-	one-way ANOVA; Bonferroni's post hoc analysis	Next-generation sequencing (NGS)	25	18	47,6 ± 14,7	38,6 ± 8,0	0.565	0.278	-	Patients with DN were defined as those who had history of DM and had showed micro- or macro-albuminuria (24-h urine albumin ≥ 30 mg/day or a spot urine albumin-to creatinine ratio ≥ 30 mg/g) on at least three consecutive measurements.	Diabetic patients with an estimated glomerular filtration rate (eGFR) < 60 mL/min/1.73 m2 were not included in the study, because we focused on early DN.
31331349	Kim, H., Bae, Y.U., et al. 2019	Human	ExoQuick Exosome Precipitation Solution	Serum	-	-	-	Supernatants, obtained after the centrifugation (3000×g for 15 min) of serum samples, were mixed with the ExoQuick reagent and incubated for 30 min at 4 °C. After another centrifugation at 1500×g for 30 min the supernatant was aspirated and the pellet retained. After resuspension of the pellet in sterile phosphate- buffered saline, the RNA was extracted using a miRNeasy Mini Kit (Qiagen, Hilden, …	Diabetic nephropathy	Serum-derived exosomes	miR-1273g-3p	-	-	-	-7.99521	-	one-way ANOVA; Bonferroni's post hoc analysis	Next-generation sequencing (NGS)	25	18	47,6 ± 14,7	38,6 ± 8,0	0.565	0.278	-	Patients with DN were defined as those who had history of DM and had showed micro- or macro-albuminuria (24-h urine albumin ≥ 30 mg/day or a spot urine albumin-to creatinine ratio ≥ 30 mg/g) on at least three consecutive measurements.	Diabetic patients with an estimated glomerular filtration rate (eGFR) < 60 mL/min/1.73 m2 were not included in the study, because we focused on early DN.
31331349	Kim, H., Bae, Y.U., et al. 2019	Human	ExoQuick Exosome Precipitation Solution	Serum	-	-	-	Supernatants, obtained after the centrifugation (3000×g for 15 min) of serum samples, were mixed with the ExoQuick reagent and incubated for 30 min at 4 °C. After another centrifugation at 1500×g for 30 min the supernatant was aspirated and the pellet retained. After resuspension of the pellet in sterile phosphate- buffered saline, the RNA was extracted using a miRNeasy Mini Kit (Qiagen, Hilden, …	Diabetic nephropathy	Serum-derived exosomes	miR-140-5p	-	-	-	-7.13678	-	one-way ANOVA; Bonferroni's post hoc analysis	Next-generation sequencing (NGS)	25	18	47,6 ± 14,7	38,6 ± 8,0	0.565	0.278	-	Patients with DN were defined as those who had history of DM and had showed micro- or macro-albuminuria (24-h urine albumin ≥ 30 mg/day or a spot urine albumin-to creatinine ratio ≥ 30 mg/g) on at least three consecutive measurements.	Diabetic patients with an estimated glomerular filtration rate (eGFR) < 60 mL/min/1.73 m2 were not included in the study, because we focused on early DN.
30814518	Cheng, M., Yang, J., et al. 2019	Mice	ExoQuick Exosome Precipitation Solution	Plasma	-	Electron microscopy, nanoparticle tracking analysis, and Western Blotting	-	The plasma was centrifuged at 3000 × g for 15 min to remove cell debris and platelets. Then each 250 μL platelet-free plasma was added into 63 μL ExoQuick Exosome Precipitation Solution (System Biosciences Co., Ltd., USA) and carefully mixed. After 4 °C refrigeration for 30 min, the mixture was centrifuged at 1500 g for 30 min at 4 °C to sediment exosomes (20 μg exosomes/250 μL platelet-free plas…	Acute myocardial infarction (AMI)	Plasma-derived exosomes	miR-1a	+	-	-	-	< 0,0001	two-way ANOVA	qRT-PCR	5	5	8 weeks-old	8 weeks-old	1	1	6h post-surgery	-	-
30814518	Cheng, M., Yang, J., et al. 2019	Mice	ExoQuick Exosome Precipitation Solution	Plasma	-	Electron microscopy, nanoparticle tracking analysis, and Western Blotting	-	The plasma was centrifuged at 3000 × g for 15 min to remove cell debris and platelets. Then each 250 μL platelet-free plasma was added into 63 μL ExoQuick Exosome Precipitation Solution (System Biosciences Co., Ltd., USA) and carefully mixed. After 4 °C refrigeration for 30 min, the mixture was centrifuged at 1500 g for 30 min at 4 °C to sediment exosomes (20 μg exosomes/250 μL platelet-free plas…	Acute myocardial infarction (AMI)	Plasma-derived exosomes	miR-208a	+	-	-	-	< 0,0001	two-way ANOVA	qRT-PCR	5	5	8 weeks-old	8 weeks-old	1	1	6h post-surgery	-	-
30814518	Cheng, M., Yang, J., et al. 2019	Mice	ExoQuick Exosome Precipitation Solution	Plasma	-	Electron microscopy, nanoparticle tracking analysis, and Western Blotting	-	The plasma was centrifuged at 3000 × g for 15 min to remove cell debris and platelets. Then each 250 μL platelet-free plasma was added into 63 μL ExoQuick Exosome Precipitation Solution (System Biosciences Co., Ltd., USA) and carefully mixed. After 4 °C refrigeration for 30 min, the mixture was centrifuged at 1500 g for 30 min at 4 °C to sediment exosomes (20 μg exosomes/250 μL platelet-free plas…	Acute myocardial infarction (AMI)	Plasma-derived exosomes	miR-133a	+	-	-	-	< 0,01	two-way ANOVA	qRT-PCR	5	5	8 weeks-old	8 weeks-old	1	1	6h post-surgery	-	-
30814518	Cheng, M., Yang, J., et al. 2019	Mice	ExoQuick Exosome Precipitation Solution	Plasma	-	Electron microscopy, nanoparticle tracking analysis, and Western Blotting	-	The plasma was centrifuged at 3000 × g for 15 min to remove cell debris and platelets. Then each 250 μL platelet-free plasma was added into 63 μL ExoQuick Exosome Precipitation Solution (System Biosciences Co., Ltd., USA) and carefully mixed. After 4 °C refrigeration for 30 min, the mixture was centrifuged at 1500 g for 30 min at 4 °C to sediment exosomes (20 μg exosomes/250 μL platelet-free plas…	Acute myocardial infarction (AMI)	Plasma-derived exosomes	miR-499-5p	+	-	-	-	< 0,0001	two-way ANOVA	qRT-PCR	5	5	8 weeks-old	8 weeks-old	1	1	6h post-surgery	-	-
30814518	Cheng, M., Yang, J., et al. 2019	Human	ExoQuick Exosome Precipitation Solution	Plasma	-	Electron microscopy, NanoSight, and Western Blotting	-	The plasma was centrifuged at 3000 × g for 15 min to remove cell debris and platelets. Then each 250 μL platelet-free plasma was added into 63 μL ExoQuick Exosome Precipitation Solution (System Biosciences Co., Ltd., USA) and carefully mixed. After 4 °C refrigeration for 30 min, the mixture was centrifuged at 1500 g for 30 min at 4 °C to sediment exosomes (20 μg exosomes/250 μL platelet-free plas…	Coronary artery disease (CAD)	Plasma-derived exosomes	miR-1a	+	-	-	-	< 0,001	two-way ANOVA	qRT-PCR	3	3	49 - 74	64 -78	0.666667	0.333333	-	Underlying coronary artery disease and acute ST–elevation MI during their initial hospital presentation, immediately prior to coronary intervention and stent placement. Control plasma samples were obtained from three patients with underlying coronary artery disease (but without evidence of acute coronary syndrome) after elective percutaneous coronary intervention.	-
30814518	Cheng, M., Yang, J., et al. 2019	Human	ExoQuick Exosome Precipitation Solution	Plasma	-	Electron microscopy, NanoSight, and Western Blotting	-	The plasma was centrifuged at 3000 × g for 15 min to remove cell debris and platelets. Then each 250 μL platelet-free plasma was added into 63 μL ExoQuick Exosome Precipitation Solution (System Biosciences Co., Ltd., USA) and carefully mixed. After 4 °C refrigeration for 30 min, the mixture was centrifuged at 1500 g for 30 min at 4 °C to sediment exosomes (20 μg exosomes/250 μL platelet-free plas…	Coronary artery disease (CAD)	Plasma-derived exosomes	miR-208a	+	-	-	-	< 0,001	two-way ANOVA	qRT-PCR	3	3	49 - 74	64 -78	0.666667	0.333333	-	Underlying coronary artery disease and acute ST–elevation MI during their initial hospital presentation, immediately prior to coronary intervention and stent placement. Control plasma samples were obtained from three patients with underlying coronary artery disease (but without evidence of acute coronary syndrome) after elective percutaneous coronary intervention.	-
30814518	Cheng, M., Yang, J., et al. 2019	Human	ExoQuick Exosome Precipitation Solution	Plasma	-	Electron microscopy, NanoSight, and Western Blotting	-	The plasma was centrifuged at 3000 × g for 15 min to remove cell debris and platelets. Then each 250 μL platelet-free plasma was added into 63 μL ExoQuick Exosome Precipitation Solution (System Biosciences Co., Ltd., USA) and carefully mixed. After 4 °C refrigeration for 30 min, the mixture was centrifuged at 1500 g for 30 min at 4 °C to sediment exosomes (20 μg exosomes/250 μL platelet-free plas…	Coronary artery disease (CAD)	Plasma-derived exosomes	miR-133a	+	-	-	-	< 0,001	two-way ANOVA	qRT-PCR	3	3	49 - 74	64 -78	0.666667	0.333333	-	Underlying coronary artery disease and acute ST–elevation MI during their initial hospital presentation, immediately prior to coronary intervention and stent placement. Control plasma samples were obtained from three patients with underlying coronary artery disease (but without evidence of acute coronary syndrome) after elective percutaneous coronary intervention.	-
30814518	Cheng, M., Yang, J., et al. 2019	Human	ExoQuick Exosome Precipitation Solution	Plasma	-	Electron microscopy, NanoSight, and Western Blotting	-	The plasma was centrifuged at 3000 × g for 15 min to remove cell debris and platelets. Then each 250 μL platelet-free plasma was added into 63 μL ExoQuick Exosome Precipitation Solution (System Biosciences Co., Ltd., USA) and carefully mixed. After 4 °C refrigeration for 30 min, the mixture was centrifuged at 1500 g for 30 min at 4 °C to sediment exosomes (20 μg exosomes/250 μL platelet-free plas…	Coronary artery disease (CAD)	Plasma-derived exosomes	miR-499-5p	+	-	-	-	< 0,001	two-way ANOVA	qRT-PCR	3	3	49 - 74	64 -78	0.666667	0.333333	-	Underlying coronary artery disease and acute ST–elevation MI during their initial hospital presentation, immediately prior to coronary intervention and stent placement. Control plasma samples were obtained from three patients with underlying coronary artery disease (but without evidence of acute coronary syndrome) after elective percutaneous coronary intervention.	-
30622793	Wu, T., Chen, Y., et al. 2018	Human	Exosome isolation kit	Serum	Stored at -80°C	NaNOZS-90, electron microscopy and western blotting	The size of the extracted double-layer membrane particles ranged from 40 to 150 nm (average 80 nm). Furthermore, the protein markers of exosomes (CD63 and Hsp70) were confirmed by Western blot.	The serum was first centrifuged at 2,000 g at room temperature for 20 min to remove debris. Then, serum was incubated with the one-third volume of exosome isolation reagent (R11064.5, RiboBio, Guangzhou, China) at 4 ℃ for 30 minutes. Exosomes were then collected after a 2-min 15,000 g spin at 4 ℃ for (Sorvall ST16R, Thermo Scientific). A Zetasizer NaNOZS-90 (Malvern Instrucments Ltd., Malvern, UK…	Heart failure with reduced ejection fraction (HFrEF)	Serum-derived exosomes	miR-92b-5p	+	-	-	-	< 0,001	Mann-Whitney U test	qRT-PCR	28	30	59,7 ± 3,3	56,5 ± 2,1	0.643	0.733	-	According to the HF guidelines of ESC (2016), patients with LVEF ≤ 40 % were classified as HFrEF.	Congenital or primary valvular heart diseases, rheumatic diseases, severe pulmonary disease, and cancer.
30622793	Wu, T., Chen, Y., et al. 2018	Human	Exosome isolation kit	Serum	Stored at -80°C	NaNOZS-90, electron microscopy and western blotting	The size of the extracted double-layer membrane particles ranged from 40 to 150 nm (average 80 nm). Furthermore, the protein markers of exosomes (CD63 and Hsp70) were confirmed by Western blot.	The serum was first centrifuged at 2,000 g at room temperature for 20 min to remove debris. Then, serum was incubated with the one-third volume of exosome isolation reagent (R11064.5, RiboBio, Guangzhou, China) at 4 ℃ for 30 minutes. Exosomes were then collected after a 2-min 15,000 g spin at 4 ℃ for (Sorvall ST16R, Thermo Scientific). A Zetasizer NaNOZS-90 (Malvern Instrucments Ltd., Malvern, UK…	Heart failure with reduced ejection fraction (HFrEF)	Serum-derived exosomes	miR-192-5p	=	-	-	-	0.05	Mann-Whitney U test	qRT-PCR	29	30	59,7 ± 3,3	56,5 ± 2,1	0.643	0.733	-	According to the HF guidelines of ESC (2016), patients with LVEF ≤ 40 % were classified as HFrEF.	Congenital or primary valvular heart diseases, rheumatic diseases, severe pulmonary disease, and cancer.
30622793	Wu, T., Chen, Y., et al. 2018	Human	Exosome isolation kit	Serum	Stored at -80°C	NaNOZS-90, electron microscopy and western blotting	The size of the extracted double-layer membrane particles ranged from 40 to 150 nm (average 80 nm). Furthermore, the protein markers of exosomes (CD63 and Hsp70) were confirmed by Western blot.	The serum was first centrifuged at 2,000 g at room temperature for 20 min to remove debris. Then, serum was incubated with the one-third volume of exosome isolation reagent (R11064.5, RiboBio, Guangzhou, China) at 4 ℃ for 30 minutes. Exosomes were then collected after a 2-min 15,000 g spin at 4 ℃ for (Sorvall ST16R, Thermo Scientific). A Zetasizer NaNOZS-90 (Malvern Instrucments Ltd., Malvern, UK…	Heart failure with reduced ejection fraction (HFrEF)	Serum-derived exosomes	miR-320a	=	-	-	-	0.087	Mann-Whitney U test	qRT-PCR	30	30	59,7 ± 3,3	56,5 ± 2,1	0.643	0.733	-	According to the HF guidelines of ESC (2016), patients with LVEF ≤ 40 % were classified as HFrEF.	Congenital or primary valvular heart diseases, rheumatic diseases, severe pulmonary disease, and cancer.
29908844	Sharma, M., Ravichandran, R., et al. 2018	Human	Ultracentrifugation followed by sucrose cushion	Serum	-	Electron microscopy, CD9 staining	-	Circulating exosomes were isolated from serum samples (200 µl) using ultracentrifugation followed by sucrose cushion. Purity was confirmed by electron microscopy and CD9 staining. In brief, serum was centrifuged at 2000g followed by 10,000g for 30 mins at 4 °C to remove cell debris. Following this, serum was diluted with PBS and centrifuged to 100,000g for 70 min at 4 °C to isolate exosomes. Exos…	Coronary artery disease (CAD)	Serum-derived exosomes	Cardiac myosin	+	-	-	3.9	0.0002	-	Western blotting; densitometry analysis	5	3	52,5 ± 36,7	56,6 ± 19,7	0.9	1	-	Of the 8 HTxRs, 5 were diagnosed with CAV (chronic rejection); 3 were stable with no evidence of rejection (stable).	-
29908844	Sharma, M., Ravichandran, R., et al. 2018	Human	Ultracentrifugation followed by sucrose cushion	Serum	-	Electron microscopy, CD9 staining	-	Circulating exosomes were isolated from serum samples (200 µl) using ultracentrifugation followed by sucrose cushion. Purity was confirmed by electron microscopy and CD9 staining. In brief, serum was centrifuged at 2000g followed by 10,000g for 30 mins at 4 °C to remove cell debris. Following this, serum was diluted with PBS and centrifuged to 100,000g for 70 min at 4 °C to isolate exosomes. Exos…	Coronary artery disease (CAD)	Serum-derived exosomes	Vim	+	-	-	4.7	0.0211	-	Western blotting; densitometry analysis	5	3	52,5 ± 36,7	56,6 ± 19,7	0.9	1	-	Of the 8 HTxRs, 5 were diagnosed with CAV (chronic rejection); 3 were stable with no evidence of rejection (stable).	-
29734990	Bhattacharjee, R., Khalyfa, A., et al. 2018	Human	Exosome isolation kit	Plasma	-	Electron microscopy, western blotting	-	Exosomes were isolated from plasma using a commercially available kit (Life Technologies, Carlsbad, California, United States). Briefly, plasma was centrifuged at 2000 xg for 20 minutes to remove cell/debris. The supernatants were collected and 0.2 volume of the Total Exosome Isolation Reagent was added. The mixtures were incubated at 4°C for 30 minutes followed by centrifugation at 10,000 xg for…	Obstructive sleep apnea (OSA)	Plasma-derived exosomes	hsa-miR-16-5p	+	-	-	-	< 0,02	-	miRNA Array, qRT-PCR	8	8	51,4 ± 11,9	-	0.416667	-	-	Our inclusion criteria were age 18 year or older and age 75 years or younger, diagnosis of OHS in the past 3 months but no initiation of PAP therapy, body mass index (BMI) ≥ 30 kg/m2, daytime partial pressure of arterial CO2 (PaCO2) ≥ 45 mmHg, daytime pH > 7.35 from an arterial blood gas, presence of OSA with an apnea-hypopnea index (AHI) ≥ 5 events/h of sleep, and forced expiratory volume in 1 s…	We excluded acutely ill and unstable patients, a hospitalization for respiratory exacerbation fewer than 6 weeks prior to screening visit, and evidence of alkalosis (pH > 7.45) on the arterial blood gas measurement.
29734990	Bhattacharjee, R., Khalyfa, A., et al. 2018	Human	Exosome isolation kit	Plasma	-	Electron microscopy, western blotting	-	Exosomes were isolated from plasma using a commercially available kit (Life Technologies, Carlsbad, California, United States). Briefly, plasma was centrifuged at 2000 xg for 20 minutes to remove cell/debris. The supernatants were collected and 0.2 volume of the Total Exosome Isolation Reagent was added. The mixtures were incubated at 4°C for 30 minutes followed by centrifugation at 10,000 xg for…	Obstructive sleep apnea (OSA)	Plasma-derived exosomes	hsa-miR-4459	+	-	-	-	< 0,04	-	miRNA Array, qRT-PCR	8	8	51,4 ± 11,9	-	0.416667	-	-	Our inclusion criteria were age 18 year or older and age 75 years or younger, diagnosis of OHS in the past 3 months but no initiation of PAP therapy, body mass index (BMI) ≥ 30 kg/m2, daytime partial pressure of arterial CO2 (PaCO2) ≥ 45 mmHg, daytime pH > 7.35 from an arterial blood gas, presence of OSA with an apnea-hypopnea index (AHI) ≥ 5 events/h of sleep, and forced expiratory volume in 1 s…	We excluded acutely ill and unstable patients, a hospitalization for respiratory exacerbation fewer than 6 weeks prior to screening visit, and evidence of alkalosis (pH > 7.45) on the arterial blood gas measurement.
29734990	Bhattacharjee, R., Khalyfa, A., et al. 2018	Human	Exosome isolation kit	Plasma	-	Electron microscopy, western blotting	-	Exosomes were isolated from plasma using a commercially available kit (Life Technologies, Carlsbad, California, United States). Briefly, plasma was centrifuged at 2000 xg for 20 minutes to remove cell/debris. The supernatants were collected and 0.2 volume of the Total Exosome Isolation Reagent was added. The mixtures were incubated at 4°C for 30 minutes followed by centrifugation at 10,000 xg for…	Obstructive sleep apnea (OSA)	Plasma-derived exosomes	hsa-miR-451a	+	-	-	-	< 0,01	-	miRNA Array, qRT-PCR	8	8	51,4 ± 11,9	-	0.416667	-	-	Our inclusion criteria were age 18 year or older and age 75 years or younger, diagnosis of OHS in the past 3 months but no initiation of PAP therapy, body mass index (BMI) ≥ 30 kg/m2, daytime partial pressure of arterial CO2 (PaCO2) ≥ 45 mmHg, daytime pH > 7.35 from an arterial blood gas, presence of OSA with an apnea-hypopnea index (AHI) ≥ 5 events/h of sleep, and forced expiratory volume in 1 s…	We excluded acutely ill and unstable patients, a hospitalization for respiratory exacerbation fewer than 6 weeks prior to screening visit, and evidence of alkalosis (pH > 7.45) on the arterial blood gas measurement.
29734990	Bhattacharjee, R., Khalyfa, A., et al. 2018	Human	Exosome isolation kit	Plasma	-	Electron microscopy, western blotting	-	Exosomes were isolated from plasma using a commercially available kit (Life Technologies, Carlsbad, California, United States). Briefly, plasma was centrifuged at 2000 xg for 20 minutes to remove cell/debris. The supernatants were collected and 0.2 volume of the Total Exosome Isolation Reagent was added. The mixtures were incubated at 4°C for 30 minutes followed by centrifugation at 10,000 xg for…	Obstructive sleep apnea (OSA)	Plasma-derived exosomes	hsa-miR-6510-5p	+	-	-	-	< 0,04	-	miRNA Array, qRT-PCR	8	8	51,4 ± 11,9	-	0.416667	-	-	Our inclusion criteria were age 18 year or older and age 75 years or younger, diagnosis of OHS in the past 3 months but no initiation of PAP therapy, body mass index (BMI) ≥ 30 kg/m2, daytime partial pressure of arterial CO2 (PaCO2) ≥ 45 mmHg, daytime pH > 7.35 from an arterial blood gas, presence of OSA with an apnea-hypopnea index (AHI) ≥ 5 events/h of sleep, and forced expiratory volume in 1 s…	We excluded acutely ill and unstable patients, a hospitalization for respiratory exacerbation fewer than 6 weeks prior to screening visit, and evidence of alkalosis (pH > 7.45) on the arterial blood gas measurement.
29719295	Wu, T., Chen, Y., et al. 2018	Human	Exosome isolation kit	Serum	Stored at -80°C	Electron microscopy, NaNOZS-90, Western Blotting (CD63 and Hsp70)	-	Serum was centrifuged at 2000 × g for 20 min in order to sediment debris. Subsequently, an exosome isolation reagent (RiboBio, Guangzhou, China) was added to the serum and incubated at 4°C for 30 min. Exosomes were collected by centrifugation at 15000 × g for 2 min at 4°C. The size and concentration of the exosomes were quantified by NaNOZS-90 (Malvern Instruments Ltd., Malvern, UK).	Acute heart failure (AHF) due to dilated cardiomyopathy (DCM)	Serum-derived exosomes	miR-92b-5p	+	0.0062 [0.0010–0.0119]	0.0007 [0.0002–0.0016]	-	< 0,001	Mann-Whitney U test	qRT-PCR	43	34	62 ± 2	57 ± 2	0.32	0.23	-	Patients with DCM were diagnosed using the 1995 WHO/ISFC criteria. The diagnosis of AHF was based on the guidelines of the American Heart Association. Eligible patients with DCM-AHF were those with new-onset or acute decompensation CHF as the primary cause of admission.	Patients with any other diseases such as coronary heart disease, primary valvular heart diseases, congenital heart diseases, rheumatic diseases, and tumors were excluded.
29719295	Wu, T., Chen, Y., et al. 2018	Human	Exosome isolation kit	Serum	Stored at -80°C	Electron microscopy, NaNOZS-90, Western Blotting (CD63 and Hsp70)	-	Serum was centrifuged at 2000 × g for 20 min in order to sediment debris. Subsequently, an exosome isolation reagent (RiboBio, Guangzhou, China) was added to the serum and incubated at 4°C for 30 min. Exosomes were collected by centrifugation at 15000 × g for 2 min at 4°C. The size and concentration of the exosomes were quantified by NaNOZS-90 (Malvern Instruments Ltd., Malvern, UK).	Acute heart failure (AHF) due to dilated cardiomyopathy (DCM)	Serum-derived exosomes	miR-192-5p	=	0.0028 [0.0010–0.0178]	0.0035 [0.0010–0.0066]	-	0.454	Mann-Whitney U test	qRT-PCR	43	34	62 ± 2	57 ± 2	0.32	0.23	-	Patients with DCM were diagnosed using the 1995 WHO/ISFC criteria. The diagnosis of AHF was based on the guidelines of the American Heart Association. Eligible patients with DCM-AHF were those with new-onset or acute decompensation CHF as the primary cause of admission.	Patients with any other diseases such as coronary heart disease, primary valvular heart diseases, congenital heart diseases, rheumatic diseases, and tumors were excluded.
29719295	Wu, T., Chen, Y., et al. 2018	Human	Exosome isolation kit	Serum	Stored at -80°C	Electron microscopy, NaNOZS-90, Western Blotting (CD63 and Hsp70)	-	Serum was centrifuged at 2000 × g for 20 min in order to sediment debris. Subsequently, an exosome isolation reagent (RiboBio, Guangzhou, China) was added to the serum and incubated at 4°C for 30 min. Exosomes were collected by centrifugation at 15000 × g for 2 min at 4°C. The size and concentration of the exosomes were quantified by NaNOZS-90 (Malvern Instruments Ltd., Malvern, UK).	Acute heart failure (AHF) due to dilated cardiomyopathy (DCM)	Serum-derived exosomes	miR-320a	=	0.0146 [0.0009–0.1398]	0.0055 [0.0006–0.0705]	-	0.351	Mann-Whitney U test	qRT-PCR	43	34	62 ± 2	57 ± 2	0.32	0.23	-	Patients with DCM were diagnosed using the 1995 WHO/ISFC criteria. The diagnosis of AHF was based on the guidelines of the American Heart Association. Eligible patients with DCM-AHF were those with new-onset or acute decompensation CHF as the primary cause of admission.	Patients with any other diseases such as coronary heart disease, primary valvular heart diseases, congenital heart diseases, rheumatic diseases, and tumors were excluded.
29557993	Liu, X., Yuan, W., et al. 2019	Mice	exoEasy Maxi kit	Plasma	Stored at -80°C	Western blotting (HSP70 and CD63), Dynamic light scattering	Diameter of purified exosomes ranged from 10 to 200 nm, and those ranging from 30 to 150 nm in diameter accounted for 80%; the presence of known exosomal markers CD63 and HSP70 was confirmed by Western blot analysis.	Briefly, 2 ml buffer XBP was added to 2 ml plasma and mixed well by gently inverting the tube five times. Then, the sample/XBP mix was added onto the exoEasy spin column and centrifuged at 500×g for 1 min. The flow-through was discarded and the column was placed back into the same collection tube. After that, 10 ml buffer XWP was added to the column and centrifuged at 3000×g for 5 min to remove a…	Hypertension	Plasma-derived exosomes	rno-miR-148a-3p	=	220169	123014	1.79	0.292218	-	Next-generation sequencing (NGS)	-	-	10 weeks-old	10 weeks-old	1	1	Spontaneous hypertensive rats (SHRs) and their controls normotensive Wistar-Kyoto rats (WKRs)	-	-
29557993	Liu, X., Yuan, W., et al. 2019	Mice	exoEasy Maxi kit	Plasma	Stored at -80°C	Western blotting (HSP70 and CD63), Dynamic light scattering	Diameter of purified exosomes ranged from 10 to 200 nm, and those ranging from 30 to 150 nm in diameter accounted for 80%; the presence of known exosomal markers CD63 and HSP70 was confirmed by Western blot analysis.	Briefly, 2 ml buffer XBP was added to 2 ml plasma and mixed well by gently inverting the tube five times. Then, the sample/XBP mix was added onto the exoEasy spin column and centrifuged at 500×g for 1 min. The flow-through was discarded and the column was placed back into the same collection tube. After that, 10 ml buffer XWP was added to the column and centrifuged at 3000×g for 5 min to remove a…	Hypertension	Plasma-derived exosomes	rno-miR-122-5p	-	102792	157812	0.65	0.000233	-	Next-generation sequencing (NGS)	-	-	10 weeks-old	10 weeks-old	1	1	Spontaneous hypertensive rats (SHRs) and their controls normotensive Wistar-Kyoto rats (WKRs)	-	-
29557993	Liu, X., Yuan, W., et al. 2019	Mice	exoEasy Maxi kit	Plasma	Stored at -80°C	Western blotting (HSP70 and CD63), Dynamic light scattering	Diameter of purified exosomes ranged from 10 to 200 nm, and those ranging from 30 to 150 nm in diameter accounted for 80%; the presence of known exosomal markers CD63 and HSP70 was confirmed by Western blot analysis.	Briefly, 2 ml buffer XBP was added to 2 ml plasma and mixed well by gently inverting the tube five times. Then, the sample/XBP mix was added onto the exoEasy spin column and centrifuged at 500×g for 1 min. The flow-through was discarded and the column was placed back into the same collection tube. After that, 10 ml buffer XWP was added to the column and centrifuged at 3000×g for 5 min to remove a…	Hypertension	Plasma-derived exosomes	rno-miR-143-3p	-	36951	52339.3	0.71	0.009031	-	Next-generation sequencing (NGS)	-	-	10 weeks-old	10 weeks-old	1	1	Spontaneous hypertensive rats (SHRs) and their controls normotensive Wistar-Kyoto rats (WKRs)	-	-
29557993	Liu, X., Yuan, W., et al. 2019	Mice	exoEasy Maxi kit	Plasma	Stored at -80°C	Western blotting (HSP70 and CD63), Dynamic light scattering	Diameter of purified exosomes ranged from 10 to 200 nm, and those ranging from 30 to 150 nm in diameter accounted for 80%; the presence of known exosomal markers CD63 and HSP70 was confirmed by Western blot analysis.	Briefly, 2 ml buffer XBP was added to 2 ml plasma and mixed well by gently inverting the tube five times. Then, the sample/XBP mix was added onto the exoEasy spin column and centrifuged at 500×g for 1 min. The flow-through was discarded and the column was placed back into the same collection tube. After that, 10 ml buffer XWP was added to the column and centrifuged at 3000×g for 5 min to remove a…	Hypertension	Plasma-derived exosomes	rno-miR-192-5p	=	33057.1	35411.1	0.93	0.099329	-	Next-generation sequencing (NGS)	-	-	10 weeks-old	10 weeks-old	1	1	Spontaneous hypertensive rats (SHRs) and their controls normotensive Wistar-Kyoto rats (WKRs)	-	-
29557993	Liu, X., Yuan, W., et al. 2019	Mice	exoEasy Maxi kit	Plasma	Stored at -80°C	Western blotting (HSP70 and CD63), Dynamic light scattering	Diameter of purified exosomes ranged from 10 to 200 nm, and those ranging from 30 to 150 nm in diameter accounted for 80%; the presence of known exosomal markers CD63 and HSP70 was confirmed by Western blot analysis.	Briefly, 2 ml buffer XBP was added to 2 ml plasma and mixed well by gently inverting the tube five times. Then, the sample/XBP mix was added onto the exoEasy spin column and centrifuged at 500×g for 1 min. The flow-through was discarded and the column was placed back into the same collection tube. After that, 10 ml buffer XWP was added to the column and centrifuged at 3000×g for 5 min to remove a…	Hypertension	Plasma-derived exosomes	rno-let-7i-5p	=	24162.7	10342.7	2.34	0.073269	-	Next-generation sequencing (NGS)	-	-	10 weeks-old	10 weeks-old	1	1	Spontaneous hypertensive rats (SHRs) and their controls normotensive Wistar-Kyoto rats (WKRs)	-	-
29557993	Liu, X., Yuan, W., et al. 2019	Mice	exoEasy Maxi kit	Plasma	Stored at -80°C	Western blotting (HSP70 and CD63), Dynamic light scattering	Diameter of purified exosomes ranged from 10 to 200 nm, and those ranging from 30 to 150 nm in diameter accounted for 80%; the presence of known exosomal markers CD63 and HSP70 was confirmed by Western blot analysis.	Briefly, 2 ml buffer XBP was added to 2 ml plasma and mixed well by gently inverting the tube five times. Then, the sample/XBP mix was added onto the exoEasy spin column and centrifuged at 500×g for 1 min. The flow-through was discarded and the column was placed back into the same collection tube. After that, 10 ml buffer XWP was added to the column and centrifuged at 3000×g for 5 min to remove a…	Hypertension	Plasma-derived exosomes	rno-miR-215	=	15992.7	13655.5	1.17	0.526904	-	Next-generation sequencing (NGS)	-	-	10 weeks-old	10 weeks-old	1	1	Spontaneous hypertensive rats (SHRs) and their controls normotensive Wistar-Kyoto rats (WKRs)	-	-
29557993	Liu, X., Yuan, W., et al. 2019	Mice	exoEasy Maxi kit	Plasma	Stored at -80°C	Western blotting (HSP70 and CD63), Dynamic light scattering	Diameter of purified exosomes ranged from 10 to 200 nm, and those ranging from 30 to 150 nm in diameter accounted for 80%; the presence of known exosomal markers CD63 and HSP70 was confirmed by Western blot analysis.	Briefly, 2 ml buffer XBP was added to 2 ml plasma and mixed well by gently inverting the tube five times. Then, the sample/XBP mix was added onto the exoEasy spin column and centrifuged at 500×g for 1 min. The flow-through was discarded and the column was placed back into the same collection tube. After that, 10 ml buffer XWP was added to the column and centrifuged at 3000×g for 5 min to remove a…	Hypertension	Plasma-derived exosomes	rno-miR-140-3p	=	15847.6	9657.6	1.64	0.427078	-	Next-generation sequencing (NGS)	-	-	10 weeks-old	10 weeks-old	1	1	Spontaneous hypertensive rats (SHRs) and their controls normotensive Wistar-Kyoto rats (WKRs)	-	-
29557993	Liu, X., Yuan, W., et al. 2019	Mice	exoEasy Maxi kit	Plasma	Stored at -80°C	Western blotting (HSP70 and CD63), Dynamic light scattering	Diameter of purified exosomes ranged from 10 to 200 nm, and those ranging from 30 to 150 nm in diameter accounted for 80%; the presence of known exosomal markers CD63 and HSP70 was confirmed by Western blot analysis.	Briefly, 2 ml buffer XBP was added to 2 ml plasma and mixed well by gently inverting the tube five times. Then, the sample/XBP mix was added onto the exoEasy spin column and centrifuged at 500×g for 1 min. The flow-through was discarded and the column was placed back into the same collection tube. After that, 10 ml buffer XWP was added to the column and centrifuged at 3000×g for 5 min to remove a…	Hypertension	Plasma-derived exosomes	rno-miR-99a-5p	-	12604.7	15267.8	0.83	0.007784	-	Next-generation sequencing (NGS)	-	-	10 weeks-old	10 weeks-old	1	1	Spontaneous hypertensive rats (SHRs) and their controls normotensive Wistar-Kyoto rats (WKRs)	-	-
29557993	Liu, X., Yuan, W., et al. 2019	Mice	exoEasy Maxi kit	Plasma	Stored at -80°C	Western blotting (HSP70 and CD63), Dynamic light scattering	Diameter of purified exosomes ranged from 10 to 200 nm, and those ranging from 30 to 150 nm in diameter accounted for 80%; the presence of known exosomal markers CD63 and HSP70 was confirmed by Western blot analysis.	Briefly, 2 ml buffer XBP was added to 2 ml plasma and mixed well by gently inverting the tube five times. Then, the sample/XBP mix was added onto the exoEasy spin column and centrifuged at 500×g for 1 min. The flow-through was discarded and the column was placed back into the same collection tube. After that, 10 ml buffer XWP was added to the column and centrifuged at 3000×g for 5 min to remove a…	Hypertension	Plasma-derived exosomes	rno-miR-378a-3p	-	11510.4	14852.5	0.77	0.001335	-	Next-generation sequencing (NGS)	-	-	10 weeks-old	10 weeks-old	1	1	Spontaneous hypertensive rats (SHRs) and their controls normotensive Wistar-Kyoto rats (WKRs)	-	-
29557993	Liu, X., Yuan, W., et al. 2019	Mice	exoEasy Maxi kit	Plasma	Stored at -80°C	Western blotting (HSP70 and CD63), Dynamic light scattering	Diameter of purified exosomes ranged from 10 to 200 nm, and those ranging from 30 to 150 nm in diameter accounted for 80%; the presence of known exosomal markers CD63 and HSP70 was confirmed by Western blot analysis.	Briefly, 2 ml buffer XBP was added to 2 ml plasma and mixed well by gently inverting the tube five times. Then, the sample/XBP mix was added onto the exoEasy spin column and centrifuged at 500×g for 1 min. The flow-through was discarded and the column was placed back into the same collection tube. After that, 10 ml buffer XWP was added to the column and centrifuged at 3000×g for 5 min to remove a…	Hypertension	Plasma-derived exosomes	rno-miR-486	-	6704.65	13723.4	0.49	1.75e-05	-	Next-generation sequencing (NGS)	-	-	10 weeks-old	10 weeks-old	1	1	Spontaneous hypertensive rats (SHRs) and their controls normotensive Wistar-Kyoto rats (WKRs)	-	-
29557993	Liu, X., Yuan, W., et al. 2019	Mice	exoEasy Maxi kit	Plasma	Stored at -80°C	Western blotting (HSP70 and CD63), Dynamic light scattering	Diameter of purified exosomes ranged from 10 to 200 nm, and those ranging from 30 to 150 nm in diameter accounted for 80%; the presence of known exosomal markers CD63 and HSP70 was confirmed by Western blot analysis.	Briefly, 2 ml buffer XBP was added to 2 ml plasma and mixed well by gently inverting the tube five times. Then, the sample/XBP mix was added onto the exoEasy spin column and centrifuged at 500×g for 1 min. The flow-through was discarded and the column was placed back into the same collection tube. After that, 10 ml buffer XWP was added to the column and centrifuged at 3000×g for 5 min to remove a…	Hypertension	Plasma-derived exosomes	rno-miR-378a-5p	-	8.22	21.36	0.38	1.21e-09	-	Next-generation sequencing (NGS)	-	-	10 weeks-old	10 weeks-old	1	1	Spontaneous hypertensive rats (SHRs) and their controls normotensive Wistar-Kyoto rats (WKRs)	-	-
29557993	Liu, X., Yuan, W., et al. 2019	Mice	exoEasy Maxi kit	Plasma	Stored at -80°C	Western blotting (HSP70 and CD63), Dynamic light scattering	Diameter of purified exosomes ranged from 10 to 200 nm, and those ranging from 30 to 150 nm in diameter accounted for 80%; the presence of known exosomal markers CD63 and HSP70 was confirmed by Western blot analysis.	Briefly, 2 ml buffer XBP was added to 2 ml plasma and mixed well by gently inverting the tube five times. Then, the sample/XBP mix was added onto the exoEasy spin column and centrifuged at 500×g for 1 min. The flow-through was discarded and the column was placed back into the same collection tube. After that, 10 ml buffer XWP was added to the column and centrifuged at 3000×g for 5 min to remove a…	Hypertension	Plasma-derived exosomes	rno-miR-187-3p	-	15.73	44.89	0.35	3.37e-09	-	Next-generation sequencing (NGS)	-	-	10 weeks-old	10 weeks-old	1	1	Spontaneous hypertensive rats (SHRs) and their controls normotensive Wistar-Kyoto rats (WKRs)	-	-
29557993	Liu, X., Yuan, W., et al. 2019	Mice	exoEasy Maxi kit	Plasma	Stored at -80°C	Western blotting (HSP70 and CD63), Dynamic light scattering	Diameter of purified exosomes ranged from 10 to 200 nm, and those ranging from 30 to 150 nm in diameter accounted for 80%; the presence of known exosomal markers CD63 and HSP70 was confirmed by Western blot analysis.	Briefly, 2 ml buffer XBP was added to 2 ml plasma and mixed well by gently inverting the tube five times. Then, the sample/XBP mix was added onto the exoEasy spin column and centrifuged at 500×g for 1 min. The flow-through was discarded and the column was placed back into the same collection tube. After that, 10 ml buffer XWP was added to the column and centrifuged at 3000×g for 5 min to remove a…	Hypertension	Plasma-derived exosomes	rno-miR-383-5p	+	75.52	12.36	6.11	3.97e-09	-	Next-generation sequencing (NGS)	-	-	10 weeks-old	10 weeks-old	1	1	Spontaneous hypertensive rats (SHRs) and their controls normotensive Wistar-Kyoto rats (WKRs)	-	-
29557993	Liu, X., Yuan, W., et al. 2019	Mice	exoEasy Maxi kit	Plasma	Stored at -80°C	Western blotting (HSP70 and CD63), Dynamic light scattering	Diameter of purified exosomes ranged from 10 to 200 nm, and those ranging from 30 to 150 nm in diameter accounted for 80%; the presence of known exosomal markers CD63 and HSP70 was confirmed by Western blot analysis.	Briefly, 2 ml buffer XBP was added to 2 ml plasma and mixed well by gently inverting the tube five times. Then, the sample/XBP mix was added onto the exoEasy spin column and centrifuged at 500×g for 1 min. The flow-through was discarded and the column was placed back into the same collection tube. After that, 10 ml buffer XWP was added to the column and centrifuged at 3000×g for 5 min to remove a…	Hypertension	Plasma-derived exosomes	rno-miR-6329	+	21.1	4.21	5.01	2.02e-05	-	Next-generation sequencing (NGS)	-	-	10 weeks-old	10 weeks-old	1	1	Spontaneous hypertensive rats (SHRs) and their controls normotensive Wistar-Kyoto rats (WKRs)	-	-
29557993	Liu, X., Yuan, W., et al. 2019	Mice	exoEasy Maxi kit	Plasma	Stored at -80°C	Western blotting (HSP70 and CD63), Dynamic light scattering	Diameter of purified exosomes ranged from 10 to 200 nm, and those ranging from 30 to 150 nm in diameter accounted for 80%; the presence of known exosomal markers CD63 and HSP70 was confirmed by Western blot analysis.	Briefly, 2 ml buffer XBP was added to 2 ml plasma and mixed well by gently inverting the tube five times. Then, the sample/XBP mix was added onto the exoEasy spin column and centrifuged at 500×g for 1 min. The flow-through was discarded and the column was placed back into the same collection tube. After that, 10 ml buffer XWP was added to the column and centrifuged at 3000×g for 5 min to remove a…	Hypertension	Plasma-derived exosomes	rno-miR-206-3p	-	452.9	912.83	0.5	0.000162	-	Next-generation sequencing (NGS)	-	-	10 weeks-old	10 weeks-old	1	1	Spontaneous hypertensive rats (SHRs) and their controls normotensive Wistar-Kyoto rats (WKRs)	-	-
29557993	Liu, X., Yuan, W., et al. 2019	Mice	exoEasy Maxi kit	Plasma	Stored at -80°C	Western blotting (HSP70 and CD63), Dynamic light scattering	Diameter of purified exosomes ranged from 10 to 200 nm, and those ranging from 30 to 150 nm in diameter accounted for 80%; the presence of known exosomal markers CD63 and HSP70 was confirmed by Western blot analysis.	Briefly, 2 ml buffer XBP was added to 2 ml plasma and mixed well by gently inverting the tube five times. Then, the sample/XBP mix was added onto the exoEasy spin column and centrifuged at 500×g for 1 min. The flow-through was discarded and the column was placed back into the same collection tube. After that, 10 ml buffer XWP was added to the column and centrifuged at 3000×g for 5 min to remove a…	Hypertension	Plasma-derived exosomes	rno-miR-425-5p	+	314.8	84.11	3.74	0.000243	-	Next-generation sequencing (NGS)	-	-	10 weeks-old	10 weeks-old	1	1	Spontaneous hypertensive rats (SHRs) and their controls normotensive Wistar-Kyoto rats (WKRs)	-	-
29557993	Liu, X., Yuan, W., et al. 2019	Mice	exoEasy Maxi kit	Plasma	Stored at -80°C	Western blotting (HSP70 and CD63), Dynamic light scattering	Diameter of purified exosomes ranged from 10 to 200 nm, and those ranging from 30 to 150 nm in diameter accounted for 80%; the presence of known exosomal markers CD63 and HSP70 was confirmed by Western blot analysis.	Briefly, 2 ml buffer XBP was added to 2 ml plasma and mixed well by gently inverting the tube five times. Then, the sample/XBP mix was added onto the exoEasy spin column and centrifuged at 500×g for 1 min. The flow-through was discarded and the column was placed back into the same collection tube. After that, 10 ml buffer XWP was added to the column and centrifuged at 3000×g for 5 min to remove a…	Hypertension	Plasma-derived exosomes	rno-miR-128-3p	+	2268.54	559.1	4.06	0.000437	-	Next-generation sequencing (NGS)	-	-	10 weeks-old	10 weeks-old	1	1	Spontaneous hypertensive rats (SHRs) and their controls normotensive Wistar-Kyoto rats (WKRs)	-	-
29557993	Liu, X., Yuan, W., et al. 2019	Mice	exoEasy Maxi kit	Plasma	Stored at -80°C	Western blotting (HSP70 and CD63), Dynamic light scattering	Diameter of purified exosomes ranged from 10 to 200 nm, and those ranging from 30 to 150 nm in diameter accounted for 80%; the presence of known exosomal markers CD63 and HSP70 was confirmed by Western blot analysis.	Briefly, 2 ml buffer XBP was added to 2 ml plasma and mixed well by gently inverting the tube five times. Then, the sample/XBP mix was added onto the exoEasy spin column and centrifuged at 500×g for 1 min. The flow-through was discarded and the column was placed back into the same collection tube. After that, 10 ml buffer XWP was added to the column and centrifuged at 3000×g for 5 min to remove a…	Hypertension	Plasma-derived exosomes	rno-miR-181c-3p	+	27.77	9.64	2.88	0.000736	-	Next-generation sequencing (NGS)	-	-	10 weeks-old	10 weeks-old	1	1	Spontaneous hypertensive rats (SHRs) and their controls normotensive Wistar-Kyoto rats (WKRs)	-	-
29557993	Liu, X., Yuan, W., et al. 2019	Mice	exoEasy Maxi kit	Plasma	Stored at -80°C	Western blotting (HSP70 and CD63), Dynamic light scattering	Diameter of purified exosomes ranged from 10 to 200 nm, and those ranging from 30 to 150 nm in diameter accounted for 80%; the presence of known exosomal markers CD63 and HSP70 was confirmed by Western blot analysis.	Briefly, 2 ml buffer XBP was added to 2 ml plasma and mixed well by gently inverting the tube five times. Then, the sample/XBP mix was added onto the exoEasy spin column and centrifuged at 500×g for 1 min. The flow-through was discarded and the column was placed back into the same collection tube. After that, 10 ml buffer XWP was added to the column and centrifuged at 3000×g for 5 min to remove a…	Hypertension	Plasma-derived exosomes	rno-miR-6328	+	30.48	9.87	3.09	0.001225	-	Next-generation sequencing (NGS)	-	-	10 weeks-old	10 weeks-old	1	1	Spontaneous hypertensive rats (SHRs) and their controls normotensive Wistar-Kyoto rats (WKRs)	-	-
29557993	Liu, X., Yuan, W., et al. 2019	Mice	exoEasy Maxi kit	Plasma	Stored at -80°C	Western blotting (HSP70 and CD63), Dynamic light scattering	Diameter of purified exosomes ranged from 10 to 200 nm, and those ranging from 30 to 150 nm in diameter accounted for 80%; the presence of known exosomal markers CD63 and HSP70 was confirmed by Western blot analysis.	Briefly, 2 ml buffer XBP was added to 2 ml plasma and mixed well by gently inverting the tube five times. Then, the sample/XBP mix was added onto the exoEasy spin column and centrifuged at 500×g for 1 min. The flow-through was discarded and the column was placed back into the same collection tube. After that, 10 ml buffer XWP was added to the column and centrifuged at 3000×g for 5 min to remove a…	Hypertension	Plasma-derived exosomes	rno-miR-191a-3p	+	23.9	8.08	2.96	0.001297	-	Next-generation sequencing (NGS)	-	-	10 weeks-old	10 weeks-old	1	1	Spontaneous hypertensive rats (SHRs) and their controls normotensive Wistar-Kyoto rats (WKRs)	-	-
29557993	Liu, X., Yuan, W., et al. 2019	Mice	exoEasy Maxi kit	Plasma	Stored at -80°C	Western blotting (HSP70 and CD63), Dynamic light scattering	Diameter of purified exosomes ranged from 10 to 200 nm, and those ranging from 30 to 150 nm in diameter accounted for 80%; the presence of known exosomal markers CD63 and HSP70 was confirmed by Western blot analysis.	Briefly, 2 ml buffer XBP was added to 2 ml plasma and mixed well by gently inverting the tube five times. Then, the sample/XBP mix was added onto the exoEasy spin column and centrifuged at 500×g for 1 min. The flow-through was discarded and the column was placed back into the same collection tube. After that, 10 ml buffer XWP was added to the column and centrifuged at 3000×g for 5 min to remove a…	Hypertension	Plasma-derived exosomes	rno-miR-218a-5p	+	753.49	251.53	3	0.001505	-	Next-generation sequencing (NGS)	-	-	10 weeks-old	10 weeks-old	1	1	Spontaneous hypertensive rats (SHRs) and their controls normotensive Wistar-Kyoto rats (WKRs)	-	-
29557993	Liu, X., Yuan, W., et al. 2019	Mice	exoEasy Maxi kit	Plasma	Stored at -80°C	Western blotting (HSP70 and CD63), Dynamic light scattering	Diameter of purified exosomes ranged from 10 to 200 nm, and those ranging from 30 to 150 nm in diameter accounted for 80%; the presence of known exosomal markers CD63 and HSP70 was confirmed by Western blot analysis.	Briefly, 2 ml buffer XBP was added to 2 ml plasma and mixed well by gently inverting the tube five times. Then, the sample/XBP mix was added onto the exoEasy spin column and centrifuged at 500×g for 1 min. The flow-through was discarded and the column was placed back into the same collection tube. After that, 10 ml buffer XWP was added to the column and centrifuged at 3000×g for 5 min to remove a…	Hypertension	Plasma-derived exosomes	rno-miR-148a-5p	+	98.45	35.53	2.77	0.002903	-	Next-generation sequencing (NGS)	-	-	10 weeks-old	10 weeks-old	1	1	Spontaneous hypertensive rats (SHRs) and their controls normotensive Wistar-Kyoto rats (WKRs)	-	-
29557993	Liu, X., Yuan, W., et al. 2019	Mice	exoEasy Maxi kit	Plasma	Stored at -80°C	Western blotting (HSP70 and CD63), Dynamic light scattering	Diameter of purified exosomes ranged from 10 to 200 nm, and those ranging from 30 to 150 nm in diameter accounted for 80%; the presence of known exosomal markers CD63 and HSP70 was confirmed by Western blot analysis.	Briefly, 2 ml buffer XBP was added to 2 ml plasma and mixed well by gently inverting the tube five times. Then, the sample/XBP mix was added onto the exoEasy spin column and centrifuged at 500×g for 1 min. The flow-through was discarded and the column was placed back into the same collection tube. After that, 10 ml buffer XWP was added to the column and centrifuged at 3000×g for 5 min to remove a…	Hypertension	Plasma-derived exosomes	rno-let-7d-5p	+	470.32	161.42	2.91	0.003539	-	Next-generation sequencing (NGS)	-	-	10 weeks-old	10 weeks-old	1	1	Spontaneous hypertensive rats (SHRs) and their controls normotensive Wistar-Kyoto rats (WKRs)	-	-
29557993	Liu, X., Yuan, W., et al. 2019	Mice	exoEasy Maxi kit	Plasma	Stored at -80°C	Western blotting (HSP70 and CD63), Dynamic light scattering	Diameter of purified exosomes ranged from 10 to 200 nm, and those ranging from 30 to 150 nm in diameter accounted for 80%; the presence of known exosomal markers CD63 and HSP70 was confirmed by Western blot analysis.	Briefly, 2 ml buffer XBP was added to 2 ml plasma and mixed well by gently inverting the tube five times. Then, the sample/XBP mix was added onto the exoEasy spin column and centrifuged at 500×g for 1 min. The flow-through was discarded and the column was placed back into the same collection tube. After that, 10 ml buffer XWP was added to the column and centrifuged at 3000×g for 5 min to remove a…	Hypertension	Plasma-derived exosomes	rno-miR-181d-5p	+	178.99	66.72	2.68	0.004661	-	Next-generation sequencing (NGS)	-	-	10 weeks-old	10 weeks-old	1	1	Spontaneous hypertensive rats (SHRs) and their controls normotensive Wistar-Kyoto rats (WKRs)	-	-
29557993	Liu, X., Yuan, W., et al. 2019	Mice	exoEasy Maxi kit	Plasma	Stored at -80°C	Western blotting (HSP70 and CD63), Dynamic light scattering	Diameter of purified exosomes ranged from 10 to 200 nm, and those ranging from 30 to 150 nm in diameter accounted for 80%; the presence of known exosomal markers CD63 and HSP70 was confirmed by Western blot analysis.	Briefly, 2 ml buffer XBP was added to 2 ml plasma and mixed well by gently inverting the tube five times. Then, the sample/XBP mix was added onto the exoEasy spin column and centrifuged at 500×g for 1 min. The flow-through was discarded and the column was placed back into the same collection tube. After that, 10 ml buffer XWP was added to the column and centrifuged at 3000×g for 5 min to remove a…	Hypertension	Plasma-derived exosomes	rno-miR-185-5p	+	403.94	163.32	2.47	0.005074	-	Next-generation sequencing (NGS)	-	-	10 weeks-old	10 weeks-old	1	1	Spontaneous hypertensive rats (SHRs) and their controls normotensive Wistar-Kyoto rats (WKRs)	-	-
29557993	Liu, X., Yuan, W., et al. 2019	Mice	exoEasy Maxi kit	Plasma	Stored at -80°C	Western blotting (HSP70 and CD63), Dynamic light scattering	Diameter of purified exosomes ranged from 10 to 200 nm, and those ranging from 30 to 150 nm in diameter accounted for 80%; the presence of known exosomal markers CD63 and HSP70 was confirmed by Western blot analysis.	Briefly, 2 ml buffer XBP was added to 2 ml plasma and mixed well by gently inverting the tube five times. Then, the sample/XBP mix was added onto the exoEasy spin column and centrifuged at 500×g for 1 min. The flow-through was discarded and the column was placed back into the same collection tube. After that, 10 ml buffer XWP was added to the column and centrifuged at 3000×g for 5 min to remove a…	Hypertension	Plasma-derived exosomes	rno-miR-191a-5p	+	5485.86	1751.4	3.13	0.009058	-	Next-generation sequencing (NGS)	-	-	10 weeks-old	10 weeks-old	1	1	Spontaneous hypertensive rats (SHRs) and their controls normotensive Wistar-Kyoto rats (WKRs)	-	-
29557993	Liu, X., Yuan, W., et al. 2019	Mice	exoEasy Maxi kit	Plasma	Stored at -80°C	Western blotting (HSP70 and CD63), Dynamic light scattering	Diameter of purified exosomes ranged from 10 to 200 nm, and those ranging from 30 to 150 nm in diameter accounted for 80%; the presence of known exosomal markers CD63 and HSP70 was confirmed by Western blot analysis.	Briefly, 2 ml buffer XBP was added to 2 ml plasma and mixed well by gently inverting the tube five times. Then, the sample/XBP mix was added onto the exoEasy spin column and centrifuged at 500×g for 1 min. The flow-through was discarded and the column was placed back into the same collection tube. After that, 10 ml buffer XWP was added to the column and centrifuged at 3000×g for 5 min to remove a…	Hypertension	Plasma-derived exosomes	rno-miR-322-3p	+	98.56	38.53	2.56	0.009247	-	Next-generation sequencing (NGS)	-	-	10 weeks-old	10 weeks-old	1	1	Spontaneous hypertensive rats (SHRs) and their controls normotensive Wistar-Kyoto rats (WKRs)	-	-
29557993	Liu, X., Yuan, W., et al. 2019	Mice	exoEasy Maxi kit	Plasma	Stored at -80°C	Western blotting (HSP70 and CD63), Dynamic light scattering	Diameter of purified exosomes ranged from 10 to 200 nm, and those ranging from 30 to 150 nm in diameter accounted for 80%; the presence of known exosomal markers CD63 and HSP70 was confirmed by Western blot analysis.	Briefly, 2 ml buffer XBP was added to 2 ml plasma and mixed well by gently inverting the tube five times. Then, the sample/XBP mix was added onto the exoEasy spin column and centrifuged at 500×g for 1 min. The flow-through was discarded and the column was placed back into the same collection tube. After that, 10 ml buffer XWP was added to the column and centrifuged at 3000×g for 5 min to remove a…	Hypertension	Plasma-derived exosomes	rno-let-7f-5p	+	5420.03	1513.46	3.58	0.010847	-	Next-generation sequencing (NGS)	-	-	10 weeks-old	10 weeks-old	1	1	Spontaneous hypertensive rats (SHRs) and their controls normotensive Wistar-Kyoto rats (WKRs)	-	-
29557993	Liu, X., Yuan, W., et al. 2019	Mice	exoEasy Maxi kit	Plasma	Stored at -80°C	Western blotting (HSP70 and CD63), Dynamic light scattering	Diameter of purified exosomes ranged from 10 to 200 nm, and those ranging from 30 to 150 nm in diameter accounted for 80%; the presence of known exosomal markers CD63 and HSP70 was confirmed by Western blot analysis.	Briefly, 2 ml buffer XBP was added to 2 ml plasma and mixed well by gently inverting the tube five times. Then, the sample/XBP mix was added onto the exoEasy spin column and centrifuged at 500×g for 1 min. The flow-through was discarded and the column was placed back into the same collection tube. After that, 10 ml buffer XWP was added to the column and centrifuged at 3000×g for 5 min to remove a…	Hypertension	Plasma-derived exosomes	rno-miR-223-5p	+	263.67	107.16	2.46	0.015455	-	Next-generation sequencing (NGS)	-	-	10 weeks-old	10 weeks-old	1	1	Spontaneous hypertensive rats (SHRs) and their controls normotensive Wistar-Kyoto rats (WKRs)	-	-
29557993	Liu, X., Yuan, W., et al. 2019	Mice	exoEasy Maxi kit	Plasma	Stored at -80°C	Western blotting (HSP70 and CD63), Dynamic light scattering	Diameter of purified exosomes ranged from 10 to 200 nm, and those ranging from 30 to 150 nm in diameter accounted for 80%; the presence of known exosomal markers CD63 and HSP70 was confirmed by Western blot analysis.	Briefly, 2 ml buffer XBP was added to 2 ml plasma and mixed well by gently inverting the tube five times. Then, the sample/XBP mix was added onto the exoEasy spin column and centrifuged at 500×g for 1 min. The flow-through was discarded and the column was placed back into the same collection tube. After that, 10 ml buffer XWP was added to the column and centrifuged at 3000×g for 5 min to remove a…	Hypertension	Plasma-derived exosomes	rno-miR-3559-5p	+	118.06	45.63	2.59	0.016816	-	Next-generation sequencing (NGS)	-	-	10 weeks-old	10 weeks-old	1	1	Spontaneous hypertensive rats (SHRs) and their controls normotensive Wistar-Kyoto rats (WKRs)	-	-
29557993	Liu, X., Yuan, W., et al. 2019	Mice	exoEasy Maxi kit	Plasma	Stored at -80°C	Western blotting (HSP70 and CD63), Dynamic light scattering	Diameter of purified exosomes ranged from 10 to 200 nm, and those ranging from 30 to 150 nm in diameter accounted for 80%; the presence of known exosomal markers CD63 and HSP70 was confirmed by Western blot analysis.	Briefly, 2 ml buffer XBP was added to 2 ml plasma and mixed well by gently inverting the tube five times. Then, the sample/XBP mix was added onto the exoEasy spin column and centrifuged at 500×g for 1 min. The flow-through was discarded and the column was placed back into the same collection tube. After that, 10 ml buffer XWP was added to the column and centrifuged at 3000×g for 5 min to remove a…	Hypertension	Plasma-derived exosomes	rno-miR-17-5p	+	85.95	34.5	2.49	0.025481	-	Next-generation sequencing (NGS)	-	-	10 weeks-old	10 weeks-old	1	1	Spontaneous hypertensive rats (SHRs) and their controls normotensive Wistar-Kyoto rats (WKRs)	-	-
29557993	Liu, X., Yuan, W., et al. 2019	Mice	exoEasy Maxi kit	Plasma	Stored at -80°C	Western blotting (HSP70 and CD63), Dynamic light scattering	Diameter of purified exosomes ranged from 10 to 200 nm, and those ranging from 30 to 150 nm in diameter accounted for 80%; the presence of known exosomal markers CD63 and HSP70 was confirmed by Western blot analysis.	Briefly, 2 ml buffer XBP was added to 2 ml plasma and mixed well by gently inverting the tube five times. Then, the sample/XBP mix was added onto the exoEasy spin column and centrifuged at 500×g for 1 min. The flow-through was discarded and the column was placed back into the same collection tube. After that, 10 ml buffer XWP was added to the column and centrifuged at 3000×g for 5 min to remove a…	Hypertension	Plasma-derived exosomes	rno-let-7a-5p	+	1574.62	590.03	2.67	0.031127	-	Next-generation sequencing (NGS)	-	-	10 weeks-old	10 weeks-old	1	1	Spontaneous hypertensive rats (SHRs) and their controls normotensive Wistar-Kyoto rats (WKRs)	-	-
29557993	Liu, X., Yuan, W., et al. 2019	Mice	exoEasy Maxi kit	Plasma	Stored at -80°C	Western blotting (HSP70 and CD63), Dynamic light scattering	Diameter of purified exosomes ranged from 10 to 200 nm, and those ranging from 30 to 150 nm in diameter accounted for 80%; the presence of known exosomal markers CD63 and HSP70 was confirmed by Western blot analysis.	Briefly, 2 ml buffer XBP was added to 2 ml plasma and mixed well by gently inverting the tube five times. Then, the sample/XBP mix was added onto the exoEasy spin column and centrifuged at 500×g for 1 min. The flow-through was discarded and the column was placed back into the same collection tube. After that, 10 ml buffer XWP was added to the column and centrifuged at 3000×g for 5 min to remove a…	Hypertension	Plasma-derived exosomes	rno-miR-15b-5p	+	10.89	4.27	2.55	0.032893	-	Next-generation sequencing (NGS)	-	-	10 weeks-old	10 weeks-old	1	1	Spontaneous hypertensive rats (SHRs) and their controls normotensive Wistar-Kyoto rats (WKRs)	-	-
29557993	Liu, X., Yuan, W., et al. 2019	Mice	exoEasy Maxi kit	Plasma	Stored at -80°C	Western blotting (HSP70 and CD63), Dynamic light scattering	Diameter of purified exosomes ranged from 10 to 200 nm, and those ranging from 30 to 150 nm in diameter accounted for 80%; the presence of known exosomal markers CD63 and HSP70 was confirmed by Western blot analysis.	Briefly, 2 ml buffer XBP was added to 2 ml plasma and mixed well by gently inverting the tube five times. Then, the sample/XBP mix was added onto the exoEasy spin column and centrifuged at 500×g for 1 min. The flow-through was discarded and the column was placed back into the same collection tube. After that, 10 ml buffer XWP was added to the column and centrifuged at 3000×g for 5 min to remove a…	Hypertension	Plasma-derived exosomes	rno-miR-223-3p	+	299.16	118.78	2.52	0.037199	-	Next-generation sequencing (NGS)	-	-	10 weeks-old	10 weeks-old	1	1	Spontaneous hypertensive rats (SHRs) and their controls normotensive Wistar-Kyoto rats (WKRs)	-	-
29557993	Liu, X., Yuan, W., et al. 2019	Mice	exoEasy Maxi kit	Plasma	Stored at -80°C	Western blotting (HSP70 and CD63), Dynamic light scattering	Diameter of purified exosomes ranged from 10 to 200 nm, and those ranging from 30 to 150 nm in diameter accounted for 80%; the presence of known exosomal markers CD63 and HSP70 was confirmed by Western blot analysis.	Briefly, 2 ml buffer XBP was added to 2 ml plasma and mixed well by gently inverting the tube five times. Then, the sample/XBP mix was added onto the exoEasy spin column and centrifuged at 500×g for 1 min. The flow-through was discarded and the column was placed back into the same collection tube. After that, 10 ml buffer XWP was added to the column and centrifuged at 3000×g for 5 min to remove a…	Hypertension	Plasma-derived exosomes	rno-miR-872-5p	+	101.84	44.6	2.28	0.04068	-	Next-generation sequencing (NGS)	-	-	10 weeks-old	10 weeks-old	1	1	Spontaneous hypertensive rats (SHRs) and their controls normotensive Wistar-Kyoto rats (WKRs)	-	-
29557993	Liu, X., Yuan, W., et al. 2019	Mice	exoEasy Maxi kit	Plasma	Stored at -80°C	Western blotting (HSP70 and CD63), Dynamic light scattering	Diameter of purified exosomes ranged from 10 to 200 nm, and those ranging from 30 to 150 nm in diameter accounted for 80%; the presence of known exosomal markers CD63 and HSP70 was confirmed by Western blot analysis.	Briefly, 2 ml buffer XBP was added to 2 ml plasma and mixed well by gently inverting the tube five times. Then, the sample/XBP mix was added onto the exoEasy spin column and centrifuged at 500×g for 1 min. The flow-through was discarded and the column was placed back into the same collection tube. After that, 10 ml buffer XWP was added to the column and centrifuged at 3000×g for 5 min to remove a…	Hypertension	Plasma-derived exosomes	rno-miR-3068-3p	+	11.4	4.83	2.36	0.044896	-	Next-generation sequencing (NGS)	-	-	10 weeks-old	10 weeks-old	1	1	Spontaneous hypertensive rats (SHRs) and their controls normotensive Wistar-Kyoto rats (WKRs)	-	-
29476052	Minghua, W., Zhijian, G., et al. 2018	Mice	ExoQuick Exosome Precipitation Solution	Plasma	Stored at -80°C	Transmission electron microscopy (TEM), BCA Protein Assay Kit (Sigma, USA), flow cytometry and Western blotting	Particles were cup-shaped membrane-bound vesicles with a diameter of ~100 nm. Additionally, the expression of exosomal markers, including CD63, CD9 and CD81 was detected in RIPC-EXO by western blotting, and the levels of these markers were higher in RIPC-EXO than in EXO.	Briefly, plasma was filtered by using a 0.22-µm pore filter and treated with thrombin to pre-clear fibrin and prevent its co-precipitation using Thrombin plasma prep for exosome precipitation (500 µm at 500 U/ml) as previously described. Cell-free plasma samples were mixed with ExoQuick precipitation solution. After the mixtures were incubated for 30 min at 4 °C and centrifuged at 1500 × g for 30…	Patients undergoing Myocardial ischaemia/reperfusion (MI/R)	Plasma-derived exosomes	miR-24	+	-	-	-	< 0,05	-	RT-PCR	4	4	-	-	1	1	RIPC was induced by four cycles of 5 min of limb ischaemia in Sprague Dawley (SD) rats (using a tourniquet) followed by a 5-min reperfusion as previously described. Sham-operated rats were received as controls.	-	-
29476052	Minghua, W., Zhijian, G., et al. 2018	Mice	ExoQuick Exosome Precipitation Solution	Plasma	Stored at -80°C	Transmission electron microscopy (TEM), BCA Protein Assay Kit (Sigma, USA), flow cytometry and Western blotting	Particles were cup-shaped membrane-bound vesicles with a diameter of ~100 nm. Additionally, the expression of exosomal markers, including CD63, CD9 and CD81 was detected in RIPC-EXO by western blotting, and the levels of these markers were higher in RIPC-EXO than in EXO.	Briefly, plasma was filtered by using a 0.22-µm pore filter and treated with thrombin to pre-clear fibrin and prevent its co-precipitation using Thrombin plasma prep for exosome precipitation (500 µm at 500 U/ml) as previously described. Cell-free plasma samples were mixed with ExoQuick precipitation solution. After the mixtures were incubated for 30 min at 4 °C and centrifuged at 1500 × g for 30…	Patients undergoing Myocardial ischaemia/reperfusion (MI/R)	Plasma-derived exosomes	miR-21	=	-	-	-	-	-	RT-PCR	4	4	-	-	1	1	RIPC was induced by four cycles of 5 min of limb ischaemia in Sprague Dawley (SD) rats (using a tourniquet) followed by a 5-min reperfusion as previously described. Sham-operated rats were received as controls.	-	-
29476052	Minghua, W., Zhijian, G., et al. 2018	Mice	ExoQuick Exosome Precipitation Solution	Plasma	Stored at -80°C	Transmission electron microscopy (TEM), BCA Protein Assay Kit (Sigma, USA), flow cytometry and Western blotting	Particles were cup-shaped membrane-bound vesicles with a diameter of ~100 nm. Additionally, the expression of exosomal markers, including CD63, CD9 and CD81 was detected in RIPC-EXO by western blotting, and the levels of these markers were higher in RIPC-EXO than in EXO.	Briefly, plasma was filtered by using a 0.22-µm pore filter and treated with thrombin to pre-clear fibrin and prevent its co-precipitation using Thrombin plasma prep for exosome precipitation (500 µm at 500 U/ml) as previously described. Cell-free plasma samples were mixed with ExoQuick precipitation solution. After the mixtures were incubated for 30 min at 4 °C and centrifuged at 1500 × g for 30…	Patients undergoing Myocardial ischaemia/reperfusion (MI/R)	Plasma-derived exosomes	miR-214	=	-	-	-	-	-	RT-PCR	4	4	-	-	1	1	RIPC was induced by four cycles of 5 min of limb ischaemia in Sprague Dawley (SD) rats (using a tourniquet) followed by a 5-min reperfusion as previously described. Sham-operated rats were received as controls.	-	-
29476052	Minghua, W., Zhijian, G., et al. 2018	Mice	ExoQuick Exosome Precipitation Solution	Plasma	Stored at -80°C	Transmission electron microscopy (TEM), BCA Protein Assay Kit (Sigma, USA), flow cytometry and Western blotting	Particles were cup-shaped membrane-bound vesicles with a diameter of ~100 nm. Additionally, the expression of exosomal markers, including CD63, CD9 and CD81 was detected in RIPC-EXO by western blotting, and the levels of these markers were higher in RIPC-EXO than in EXO.	Briefly, plasma was filtered by using a 0.22-µm pore filter and treated with thrombin to pre-clear fibrin and prevent its co-precipitation using Thrombin plasma prep for exosome precipitation (500 µm at 500 U/ml) as previously described. Cell-free plasma samples were mixed with ExoQuick precipitation solution. After the mixtures were incubated for 30 min at 4 °C and centrifuged at 1500 × g for 30…	Patients undergoing Myocardial ischaemia/reperfusion (MI/R)	Plasma-derived exosomes	miR-132	=	-	-	-	-	-	RT-PCR	4	4	-	-	1	1	RIPC was induced by four cycles of 5 min of limb ischaemia in Sprague Dawley (SD) rats (using a tourniquet) followed by a 5-min reperfusion as previously described. Sham-operated rats were received as controls.	-	-
29476052	Minghua, W., Zhijian, G., et al. 2018	Mice	ExoQuick Exosome Precipitation Solution	Plasma	Stored at -80°C	Transmission electron microscopy (TEM), BCA Protein Assay Kit (Sigma, USA), flow cytometry and Western blotting	Particles were cup-shaped membrane-bound vesicles with a diameter of ~100 nm. Additionally, the expression of exosomal markers, including CD63, CD9 and CD81 was detected in RIPC-EXO by western blotting, and the levels of these markers were higher in RIPC-EXO than in EXO.	Briefly, plasma was filtered by using a 0.22-µm pore filter and treated with thrombin to pre-clear fibrin and prevent its co-precipitation using Thrombin plasma prep for exosome precipitation (500 µm at 500 U/ml) as previously described. Cell-free plasma samples were mixed with ExoQuick precipitation solution. After the mixtures were incubated for 30 min at 4 °C and centrifuged at 1500 × g for 30…	Patients undergoing Myocardial ischaemia/reperfusion (MI/R)	Plasma-derived exosomes	miR-195	=	-	-	-	-	-	RT-PCR	4	4	-	-	1	1	RIPC was induced by four cycles of 5 min of limb ischaemia in Sprague Dawley (SD) rats (using a tourniquet) followed by a 5-min reperfusion as previously described. Sham-operated rats were received as controls.	-	-
29476052	Minghua, W., Zhijian, G., et al. 2018	Mice	ExoQuick Exosome Precipitation Solution	Plasma	Stored at -80°C	Transmission electron microscopy (TEM), BCA Protein Assay Kit (Sigma, USA), flow cytometry and Western blotting	Particles were cup-shaped membrane-bound vesicles with a diameter of ~100 nm. Additionally, the expression of exosomal markers, including CD63, CD9 and CD81 was detected in RIPC-EXO by western blotting, and the levels of these markers were higher in RIPC-EXO than in EXO.	Briefly, plasma was filtered by using a 0.22-µm pore filter and treated with thrombin to pre-clear fibrin and prevent its co-precipitation using Thrombin plasma prep for exosome precipitation (500 µm at 500 U/ml) as previously described. Cell-free plasma samples were mixed with ExoQuick precipitation solution. After the mixtures were incubated for 30 min at 4 °C and centrifuged at 1500 × g for 30…	Patients undergoing Myocardial ischaemia/reperfusion (MI/R)	Plasma-derived exosomes	miR-210	=	-	-	-	-	-	RT-PCR	4	4	-	-	1	1	RIPC was induced by four cycles of 5 min of limb ischaemia in Sprague Dawley (SD) rats (using a tourniquet) followed by a 5-min reperfusion as previously described. Sham-operated rats were received as controls.	-	-
29476052	Minghua, W., Zhijian, G., et al. 2018	Mice	ExoQuick Exosome Precipitation Solution	Plasma	Stored at -80°C	Transmission electron microscopy (TEM), BCA Protein Assay Kit (Sigma, USA), flow cytometry and Western blotting	Particles were cup-shaped membrane-bound vesicles with a diameter of ~100 nm. Additionally, the expression of exosomal markers, including CD63, CD9 and CD81 was detected in RIPC-EXO by western blotting, and the levels of these markers were higher in RIPC-EXO than in EXO.	Briefly, plasma was filtered by using a 0.22-µm pore filter and treated with thrombin to pre-clear fibrin and prevent its co-precipitation using Thrombin plasma prep for exosome precipitation (500 µm at 500 U/ml) as previously described. Cell-free plasma samples were mixed with ExoQuick precipitation solution. After the mixtures were incubated for 30 min at 4 °C and centrifuged at 1500 × g for 30…	Patients undergoing Myocardial ischaemia/reperfusion (MI/R)	Plasma-derived exosomes	miR-144	=	-	-	-	-	-	RT-PCR	4	4	-	-	1	1	RIPC was induced by four cycles of 5 min of limb ischaemia in Sprague Dawley (SD) rats (using a tourniquet) followed by a 5-min reperfusion as previously described. Sham-operated rats were received as controls.	-	-
29476052	Minghua, W., Zhijian, G., et al. 2018	Mice	ExoQuick Exosome Precipitation Solution	Plasma	Stored at -80°C	Transmission electron microscopy (TEM), BCA Protein Assay Kit (Sigma, USA), flow cytometry and Western blotting	Particles were cup-shaped membrane-bound vesicles with a diameter of ~100 nm. Additionally, the expression of exosomal markers, including CD63, CD9 and CD81 was detected in RIPC-EXO by western blotting, and the levels of these markers were higher in RIPC-EXO than in EXO.	Briefly, plasma was filtered by using a 0.22-µm pore filter and treated with thrombin to pre-clear fibrin and prevent its co-precipitation using Thrombin plasma prep for exosome precipitation (500 µm at 500 U/ml) as previously described. Cell-free plasma samples were mixed with ExoQuick precipitation solution. After the mixtures were incubated for 30 min at 4 °C and centrifuged at 1500 × g for 30…	Patients undergoing Myocardial ischaemia/reperfusion (MI/R)	Plasma-derived exosomes	miR-150	=	-	-	-	-	-	RT-PCR	4	4	-	-	1	1	RIPC was induced by four cycles of 5 min of limb ischaemia in Sprague Dawley (SD) rats (using a tourniquet) followed by a 5-min reperfusion as previously described. Sham-operated rats were received as controls.	-	-
29476052	Minghua, W., Zhijian, G., et al. 2018	Mice	ExoQuick Exosome Precipitation Solution	Plasma	Stored at -80°C	Transmission electron microscopy (TEM), BCA Protein Assay Kit (Sigma, USA), flow cytometry and Western blotting	Particles were cup-shaped membrane-bound vesicles with a diameter of ~100 nm. Additionally, the expression of exosomal markers, including CD63, CD9 and CD81 was detected in RIPC-EXO by western blotting, and the levels of these markers were higher in RIPC-EXO than in EXO.	Briefly, plasma was filtered by using a 0.22-µm pore filter and treated with thrombin to pre-clear fibrin and prevent its co-precipitation using Thrombin plasma prep for exosome precipitation (500 µm at 500 U/ml) as previously described. Cell-free plasma samples were mixed with ExoQuick precipitation solution. After the mixtures were incubated for 30 min at 4 °C and centrifuged at 1500 × g for 30…	Patients undergoing Myocardial ischaemia/reperfusion (MI/R)	Plasma-derived exosomes	miR-34a	=	-	-	-	-	-	RT-PCR	4	4	-	-	1	1	RIPC was induced by four cycles of 5 min of limb ischaemia in Sprague Dawley (SD) rats (using a tourniquet) followed by a 5-min reperfusion as previously described. Sham-operated rats were received as controls.	-	-
29258606	Beg, F., Wang, R., et al. 2017	Human	Total exosome isolation kit	Plasma	-	-	-	Exosome isolation kit has several quality control steps including precipitation of exosomes followed by wash and centrifugation steps to ensure purity of exosomes and quality of exosomes are similar to ultracentrifugation method.	Heart failure with reduced ejection fraction (HFrEF)	Plasma	miR-486	=	1,1 ± 0,27	-	-	0.82	-	qRT-PCR	40	20	66,5 (10,5)	60,6 (15,7)	1	0.95	-	Inclusion criteria included an EF < 35% documented on most recent echocardiogram or NYHA class III or IV symptoms based on the assessment of patient’s primary cardiologist.	Exclusion criteria included patients with a current or previous history of malignancy or inflammatory condition.
29258606	Beg, F., Wang, R., et al. 2017	Human	Total exosome isolation kit	Plasma	-	-	-	Exosome isolation kit has several quality control steps including precipitation of exosomes followed by wash and centrifugation steps to ensure purity of exosomes and quality of exosomes are similar to ultracentrifugation method.	Heart failure with reduced ejection fraction (HFrEF)	Plasma	miR-146a	=	2,3 ± 0,79	-	-	0.14	-	qRT-PCR	40	20	66,5 (10,5)	60,6 (15,7)	1	0.95	-	Inclusion criteria included an EF < 35% documented on most recent echocardiogram or NYHA class III or IV symptoms based on the assessment of patient’s primary cardiologist.	Exclusion criteria included patients with a current or previous history of malignancy or inflammatory condition.
29258606	Beg, F., Wang, R., et al. 2017	Human	Total exosome isolation kit	Plasma	-	-	-	Exosome isolation kit has several quality control steps including precipitation of exosomes followed by wash and centrifugation steps to ensure purity of exosomes and quality of exosomes are similar to ultracentrifugation method.	Heart failure with reduced ejection fraction (HFrEF)	Plasma-derived exosomes	miR-486	=	3,0 ± 0,95	-	-	0.14	-	qRT-PCR	40	20	66,5 (10,5)	60,6 (15,7)	1	0.95	-	Inclusion criteria included an EF < 35% documented on most recent echocardiogram or NYHA class III or IV symptoms based on the assessment of patient’s primary cardiologist.	Exclusion criteria included patients with a current or previous history of malignancy or inflammatory condition.
29258606	Beg, F., Wang, R., et al. 2017	Human	Total exosome isolation kit	Plasma	-	-	-	Exosome isolation kit has several quality control steps including precipitation of exosomes followed by wash and centrifugation steps to ensure purity of exosomes and quality of exosomes are similar to ultracentrifugation method.	Heart failure with reduced ejection fraction (HFrEF)	Plasma-derived exosomes	miR-146a	+	2,46 ± 0,80	-	-	0.05	-	qRT-PCR	40	20	66,5 (10,5)	60,6 (15,7)	1	0.95	-	Inclusion criteria included an EF < 35% documented on most recent echocardiogram or NYHA class III or IV symptoms based on the assessment of patient’s primary cardiologist.	Exclusion criteria included patients with a current or previous history of malignancy or inflammatory condition.
28460288	Li, J., Tan, M., et al. 2017	Mice	-	Plasma	-	-	-	-	Coronary artery atherothrombosis	Plasma-derived exosomes	miR-223	+	2,10 ± 0,12	1,08 ± 0,13	-	< 0,05	-	qPCR	4	4	6 weeks-old	-	-	-	35 150 µm tandem stenosis group; 10 sham surgery group. The six-week-old mice were randomly assigned to one of these groups. The mice were housed in a climate-controlled environment and were fed a Western diet containing 21% fat and 0.15% cholesterol …	-	-
28460288	Li, J., Tan, M., et al. 2017	Mice	-	Plasma	-	-	-	-	Coronary artery atherothrombosis	Plasma-derived exosomes	miR-339	+	2,91 ± 0,25	1,09 ± 0,15	-	< 0,001	-	qPCR	4	4	6 weeks-old	-	-	-	36 150 µm tandem stenosis group; 10 sham surgery group. The six-week-old mice were randomly assigned to one of these groups. The mice were housed in a climate-controlled environment and were fed a Western diet containing 21% fat and 0.15% cholesterol …	-	-
28460288	Li, J., Tan, M., et al. 2017	Mice	-	Plasma	-	-	-	-	Coronary artery atherothrombosis	Plasma-derived exosomes	miR-21	+	2,41 ± 0,14	1,06 ± 0,18	-	< 0,01	-	qPCR	4	4	6 weeks-old	-	-	-	37 150 µm tandem stenosis group; 10 sham surgery group. The six-week-old mice were randomly assigned to one of these groups. The mice were housed in a climate-controlled environment and were fed a Western diet containing 21% fat and 0.15% cholesterol …	-	-
28068653	Zhao, L., Luo, H., et al. 2017	Human	Ultracentrifugation	Plasma	-	Nanoparticle tracking analysis, BCA protein assay, immunoblotting	The expression of CD31 in plasma exosomal protein was relatively high among the IPAH patients compared with the controls. The expressions of CD63 and TSG101 had no statistical significance between the 2 groups.	The exosomes were isolated from equivalent plasma by centrifugation at 1,600 g for 20 min at 4 ° C, 10,000 g for 30 min at 4 ° C, and then twice at 100,000 g for 60 min at 4 ° C.	Idiopathic Pulmonary arterial hypertension (IPAH)	-	-	-	-	-	-	-	-	-	5	5	-	-	-	-	-	-	-
27881852	Osada-Oka, M., Shiota, M., et al. 2017	Mice	Ultracentrifugation	Serum	-	Electron microscopy, Western blotting	-	Serum (1 ml) was centrifuged (2000 g for 30 min) at 4 °C to remove cellular debris. The supernatant was filtered through a 0.22 μm membrane and ultracentrifuged (100 000 g, 3 h) at 4 °C. The exosomes were washed in phosphate-buffered saline, ultracentrifuged (100 000 g, 3 h) at 4 °C and then resuspended in phosphate-buffered saline on ice. Moreover, exosomes were purified using an OptiPrep (Axis-…	Hypertension	-	HSP90	+	-	-	-	< 0,05	-	Western blotting	6	7	8 weeks-old	8 weeks-old	1	1	Wistar rats; To induce cardiac hypertrophy in rats, Ang II (200 ng kg− 1 min− 1) was dissolved in saline and continuously infused subcutaneously via an osmotic mini-pump (Alzet, Cupertino, CA, USA). At 3 and 7 days after Ang II infusion, BP was determined using the tail cuff method (BP98A; Softron, Tokyo, Japan). Under anesthesia, the rat abdomen was opened, and a blood sample was collected from …	-	-
27881852	Osada-Oka, M., Shiota, M., et al. 2017	Mice	Ultracentrifugation	Serum	-	Electron microscopy, Western blotting	-	Serum (1 ml) was centrifuged (2000 g for 30 min) at 4 °C to remove cellular debris. The supernatant was filtered through a 0.22 μm membrane and ultracentrifuged (100 000 g, 3 h) at 4 °C. The exosomes were washed in phosphate-buffered saline, ultracentrifuged (100 000 g, 3 h) at 4 °C and then resuspended in phosphate-buffered saline on ice. Moreover, exosomes were purified using an OptiPrep (Axis-…	Hypertension	-	HSC70	=	-	-	-	-	-	Western blotting	6	7	8 weeks-old	8 weeks-old	1	1	Wistar rats; To induce cardiac hypertrophy in rats, Ang II (200 ng kg− 1 min− 1) was dissolved in saline and continuously infused subcutaneously via an osmotic mini-pump (Alzet, Cupertino, CA, USA). At 3 and 7 days after Ang II infusion, BP was determined using the tail cuff method (BP98A; Softron, Tokyo, Japan). Under anesthesia, the rat abdomen was opened, and a blood sample was collected from …	-	-
27881852	Osada-Oka, M., Shiota, M., et al. 2017	Mice	Ultracentrifugation	Serum	-	Electron microscopy, Western blotting	-	Serum (1 ml) was centrifuged (2000 g for 30 min) at 4 °C to remove cellular debris. The supernatant was filtered through a 0.22 μm membrane and ultracentrifuged (100 000 g, 3 h) at 4 °C. The exosomes were washed in phosphate-buffered saline, ultracentrifuged (100 000 g, 3 h) at 4 °C and then resuspended in phosphate-buffered saline on ice. Moreover, exosomes were purified using an OptiPrep (Axis-…	Hypertension	-	CD63	+	-	-	-	< 0,05	-	Western blotting	6	7	8 weeks-old	8 weeks-old	1	1	Wistar rats; To induce cardiac hypertrophy in rats, Ang II (200 ng kg− 1 min− 1) was dissolved in saline and continuously infused subcutaneously via an osmotic mini-pump (Alzet, Cupertino, CA, USA). At 3 and 7 days after Ang II infusion, BP was determined using the tail cuff method (BP98A; Softron, Tokyo, Japan). Under anesthesia, the rat abdomen was opened, and a blood sample was collected from …	-	-
27881852	Osada-Oka, M., Shiota, M., et al. 2017	Mice	Ultracentrifugation	Serum	-	Electron microscopy, Western blotting	-	Serum (1 ml) was centrifuged (2000 g for 30 min) at 4 °C to remove cellular debris. The supernatant was filtered through a 0.22 μm membrane and ultracentrifuged (100 000 g, 3 h) at 4 °C. The exosomes were washed in phosphate-buffered saline, ultracentrifuged (100 000 g, 3 h) at 4 °C and then resuspended in phosphate-buffered saline on ice. Moreover, exosomes were purified using an OptiPrep (Axis-…	Hypertension	Serum-derived exosomes	CD9	=	-	-	-	-	-	Western blotting	6	7	8 weeks-old	8 weeks-old	1	1	Wistar rats; To induce cardiac hypertrophy in rats, Ang II (200 ng kg− 1 min− 1) was dissolved in saline and continuously infused subcutaneously via an osmotic mini-pump (Alzet, Cupertino, CA, USA). At 3 and 7 days after Ang II infusion, BP was determined using the tail cuff method (BP98A; Softron, Tokyo, Japan). Under anesthesia, the rat abdomen was opened, and a blood sample was collected from …	-	-
27881852	Osada-Oka, M., Shiota, M., et al. 2017	Mice	Ultracentrifugation	Serum	-	Electron microscopy, Western blotting	-	Serum (1 ml) was centrifuged (2000 g for 30 min) at 4 °C to remove cellular debris. The supernatant was filtered through a 0.22 μm membrane and ultracentrifuged (100 000 g, 3 h) at 4 °C. The exosomes were washed in phosphate-buffered saline, ultracentrifuged (100 000 g, 3 h) at 4 °C and then resuspended in phosphate-buffered saline on ice. Moreover, exosomes were purified using an OptiPrep (Axis-…	Hypertension	Serum-derived exosomes	GAPDH	=	-	-	-	-	-	Western blotting	6	7	8 weeks-old	8 weeks-old	1	1	Wistar rats; To induce cardiac hypertrophy in rats, Ang II (200 ng kg− 1 min− 1) was dissolved in saline and continuously infused subcutaneously via an osmotic mini-pump (Alzet, Cupertino, CA, USA). At 3 and 7 days after Ang II infusion, BP was determined using the tail cuff method (BP98A; Softron, Tokyo, Japan). Under anesthesia, the rat abdomen was opened, and a blood sample was collected from …	-	-
27881852	Osada-Oka, M., Shiota, M., et al. 2017	Mice	Ultracentrifugation	Serum	-	Electron microscopy, Western blotting	-	Serum (1 ml) was centrifuged (2000 g for 30 min) at 4 °C to remove cellular debris. The supernatant was filtered through a 0.22 μm membrane and ultracentrifuged (100 000 g, 3 h) at 4 °C. The exosomes were washed in phosphate-buffered saline, ultracentrifuged (100 000 g, 3 h) at 4 °C and then resuspended in phosphate-buffered saline on ice. Moreover, exosomes were purified using an OptiPrep (Axis-…	Hypertension	Serum-derived exosomes	CD68	=	-	-	-	-	-	Western blotting	6	7	8 weeks-old	8 weeks-old	1	1	Wistar rats; To induce cardiac hypertrophy in rats, Ang II (200 ng kg− 1 min− 1) was dissolved in saline and continuously infused subcutaneously via an osmotic mini-pump (Alzet, Cupertino, CA, USA). At 3 and 7 days after Ang II infusion, BP was determined using the tail cuff method (BP98A; Softron, Tokyo, Japan). Under anesthesia, the rat abdomen was opened, and a blood sample was collected from …	-	-
27881852	Osada-Oka, M., Shiota, M., et al. 2017	Mice	Ultracentrifugation	Serum	-	Electron microscopy, Western blotting	-	Serum (1 ml) was centrifuged (2000 g for 30 min) at 4 °C to remove cellular debris. The supernatant was filtered through a 0.22 μm membrane and ultracentrifuged (100 000 g, 3 h) at 4 °C. The exosomes were washed in phosphate-buffered saline, ultracentrifuged (100 000 g, 3 h) at 4 °C and then resuspended in phosphate-buffered saline on ice. Moreover, exosomes were purified using an OptiPrep (Axis-…	Hypertension	Serum-derived exosomes	miR-17-3p	-	-	-	-	< 0,05	ANOVA and Mann-Whitney U-test	RT-qPCR	3	4	8 weeks-old	8 weeks-old	1	1	Wistar rats; To induce cardiac hypertrophy in rats, Ang II (200 ng kg− 1 min− 1) was dissolved in saline and continuously infused subcutaneously via an osmotic mini-pump (Alzet, Cupertino, CA, USA). At 3 and 7 days after Ang II infusion, BP was determined using the tail cuff method (BP98A; Softron, Tokyo, Japan). Under anesthesia, the rat abdomen was opened, and a blood sample was collected from …	-	-
27881852	Osada-Oka, M., Shiota, M., et al. 2017	Mice	Ultracentrifugation	Serum	-	Electron microscopy, Western blotting	-	Serum (1 ml) was centrifuged (2000 g for 30 min) at 4 °C to remove cellular debris. The supernatant was filtered through a 0.22 μm membrane and ultracentrifuged (100 000 g, 3 h) at 4 °C. The exosomes were washed in phosphate-buffered saline, ultracentrifuged (100 000 g, 3 h) at 4 °C and then resuspended in phosphate-buffered saline on ice. Moreover, exosomes were purified using an OptiPrep (Axis-…	Hypertension	Serum-derived exosomes	miR-145-5p	=	-	-	-	-	ANOVA and Mann-Whitney U-test	RT-qPCR	3	4	8 weeks-old	8 weeks-old	1	1	Wistar rats; To induce cardiac hypertrophy in rats, Ang II (200 ng kg− 1 min− 1) was dissolved in saline and continuously infused subcutaneously via an osmotic mini-pump (Alzet, Cupertino, CA, USA). At 3 and 7 days after Ang II infusion, BP was determined using the tail cuff method (BP98A; Softron, Tokyo, Japan). Under anesthesia, the rat abdomen was opened, and a blood sample was collected from …	-	-
27881852	Osada-Oka, M., Shiota, M., et al. 2017	Mice	Ultracentrifugation	Serum	-	Electron microscopy, Western blotting	-	Serum (1 ml) was centrifuged (2000 g for 30 min) at 4 °C to remove cellular debris. The supernatant was filtered through a 0.22 μm membrane and ultracentrifuged (100 000 g, 3 h) at 4 °C. The exosomes were washed in phosphate-buffered saline, ultracentrifuged (100 000 g, 3 h) at 4 °C and then resuspended in phosphate-buffered saline on ice. Moreover, exosomes were purified using an OptiPrep (Axis-…	Hypertension	Serum-derived exosomes	miR-221-3p	=	-	-	-	-	ANOVA and Mann-Whitney U-test	RT-qPCR	3	4	8 weeks-old	8 weeks-old	1	1	Wistar rats; To induce cardiac hypertrophy in rats, Ang II (200 ng kg− 1 min− 1) was dissolved in saline and continuously infused subcutaneously via an osmotic mini-pump (Alzet, Cupertino, CA, USA). At 3 and 7 days after Ang II infusion, BP was determined using the tail cuff method (BP98A; Softron, Tokyo, Japan). Under anesthesia, the rat abdomen was opened, and a blood sample was collected from …	-	-
27881852	Osada-Oka, M., Shiota, M., et al. 2017	Mice	Ultracentrifugation	Serum	-	Electron microscopy, Western blotting	-	Serum (1 ml) was centrifuged (2000 g for 30 min) at 4 °C to remove cellular debris. The supernatant was filtered through a 0.22 μm membrane and ultracentrifuged (100 000 g, 3 h) at 4 °C. The exosomes were washed in phosphate-buffered saline, ultracentrifuged (100 000 g, 3 h) at 4 °C and then resuspended in phosphate-buffered saline on ice. Moreover, exosomes were purified using an OptiPrep (Axis-…	Hypertension	Serum-derived exosomes	miR-222-5p	=	-	-	-	-	ANOVA and Mann-Whitney U-test	RT-qPCR	3	4	8 weeks-old	8 weeks-old	1	1	Wistar rats; To induce cardiac hypertrophy in rats, Ang II (200 ng kg− 1 min− 1) was dissolved in saline and continuously infused subcutaneously via an osmotic mini-pump (Alzet, Cupertino, CA, USA). At 3 and 7 days after Ang II infusion, BP was determined using the tail cuff method (BP98A; Softron, Tokyo, Japan). Under anesthesia, the rat abdomen was opened, and a blood sample was collected from …	-	-
27163713	Khalyfa, A., Kheirandish-Gozal, L., et al. 2016	Human	Total exosome isolation kit	Plasma	-	Electron microscopy, flow cytometry, Western blotting	Presence of the CD63 protein	Briefly, plasma was centrifuged at 2000xg for 20 minutes to remove cell/debris. The supernatants were collected and 0.2 volume of the Total Exosome Isolation Reagent was added. The mixtures were incubated at 4°C for 30 minutes followed by centrifugation at 10,000xg for 10 minutes, and pellets were solubilized in 1x phosphate buffered saline (PBS).	Obstructive sleep apnea (OSA)	-	-	-	-	-	-	-	-	-	-	-	4 - 12 yo	4 - 12 yo	-	-	-	Consecutive healthy obese or nonobese prepubertal children. Children being evaluated for habitual snoring who were polysomnographically diagnosed with OSA were invited to participate. All participants underwent baseline anthropometric and blood pressure assessments, as well as overnight polysomnography, which were interpreted using standard approaches.	Children found to be hypertensive or using anti-hypertensive drug therapies were excluded (n=14). Furthermore, children with diabetes (fasting serum glucose ≥120 mg/dL; n=17), with a craniofacial, neuromuscular or defined genetic syndrome, and children on chronic anti-inflammatory therapy (n=11), or with any known acute or chronic illness were also excluded. In addition, children placed on sympat…
27792649	Niu, C., Wang, X., et al. 2016	Human	Ultracentrifugation	Plasma	Fresh	Mass spectrometry for proteome analysis, using nano– liquid chromatography LTQ Orbitrap XL mass spectrometer		Briefly, 2 to 3 mL of blood was collected from participants and immediately centrifuged at 1000g for 15 minutes at 4°C and subsequently at 15 000g for 3 minutes to obtain platelet-free plasma. The platelet-free plasma was ultracentrifuged at 100 000g (4°C, 1 hour) to pellet the EVs. The EVs were then resuspended in a volume of DMEM equal to the original plasma volume.	Coronary artery atherothrombosis	-	-	-	-	-	-	-	-	-	25	25	63,64 ± 2,20 (65)	62,76 ± 1,73 (62)	0.56	0.44	-	The patients met Chinese diagnostic criteria for coronary atherosclerotic heart disease (health standard WS 319-2010), and all diagnoses were confirmed by coronary angiography. eliminate interference on the basis that circulating EVs from	Patients with diabetes mellitus or cerebral hemorrhage were excluded from this study to eliminate interference on the basis that circulating EVs from these patients are considered to be abnormal.
27634792	Khalyfa, A., Zhang, C., et al. 2016	Human	Total exosome isolation kit	Plasma	-	Electron microscopy	-	Briefly, plasma was centrifuged at 2000×g for 20 min to remove cell debris. The supernatants were collected and 0.2 volume of the Total Exosome Isolation Reagent was added. The mixtures were incubated at 4°C for 30 min followed by centrifugation at 10,000×g for 10 min, and pellets were solubilized in 1× phosphate buffered saline (PBS).	Obstructive sleep apnea (OSA)	-	-	-	-	-	-	-	-	-	10	-	29,3 ± 17 (SD)	-	1	-	Experimental human model of IH: Briefly, subjects were exposed in a chamber where the gas composition was altered by either adding nitrogen or oxygen, and by adding or removing carbon dioxide. On days of exposure to IH, the gas composition within the chamber was set at a level resulting in a PETO2 of 45.0 mmHg. Periods of normoxia were elicited by delivering 100% oxygen to the subject through an …	All subjects were nonsmokers, were not taking any medications, and had no history of cardiovascular, cerebrovascular, or respiratory disease.	-
27198239	Tan, M., Yan, H.B., et al. 2016	Mice	Differential ultracentrifugation	Plasma	Frosted	Electron microscopy, Western blotting	-	Briefly, the plasma was thawed on ice, centrifuged at 1,500g for 10 minutes at 4ºC, and then centrifuge at 10,000g for 20 minutes to remove cell debris. The supernatant was transferred to a new tube to perform differential ultracentrifugation at 20,000 g (SW41Ti rotor; Beckman Coulter) for 40 minutes at 4ªC; then, the supernantant was transferred into a new tube and a centrifuge at 120,000 g for …	Coronary artery atherothrombosis	Plasma-derived exosomes	miR-223	+	1,83 ± 0,35	0,97 ± 0,15	-	0.017	-	RT-qPCR	4	4	-	-	-	-	40 150 µm tandem stenosis group; 15 sham surgery group.	-	-
27198239	Tan, M., Yan, H.B., et al. 2016	Mice	Differential ultracentrifugation	Plasma	Frosted	Electron microscopy, Western blotting	-	Briefly, the plasma was thawed on ice, centrifuged at 1,500g for 10 minutes at 4ºC, and then centrifuge at 10,000g for 20 minutes to remove cell debris. The supernatant was transferred to a new tube to perform differential ultracentrifugation at 20,000 g (SW41Ti rotor; Beckman Coulter) for 40 minutes at 4ªC; then, the supernantant was transferred into a new tube and a centrifuge at 120,000 g for …	Coronary artery atherothrombosis	Plasma-derived exosomes	miR-339	+	3,56 ± 0,25	1,03 ± 0,15	-	< 0,001	-	RT-qPCR	4	4	-	-	-	-	41 150 µm tandem stenosis group; 15 sham surgery group.	-	-
27198239	Tan, M., Yan, H.B., et al. 2016	Mice	Differential ultracentrifugation	Plasma	Frosted	Electron microscopy, Western blotting	-	Briefly, the plasma was thawed on ice, centrifuged at 1,500g for 10 minutes at 4ºC, and then centrifuge at 10,000g for 20 minutes to remove cell debris. The supernatant was transferred to a new tube to perform differential ultracentrifugation at 20,000 g (SW41Ti rotor; Beckman Coulter) for 40 minutes at 4ªC; then, the supernantant was transferred into a new tube and a centrifuge at 120,000 g for …	Coronary artery atherothrombosis	Plasma-derived exosomes	miR-21	+	2,83 ± 0,31	0,98 ± 0,18	-	0.01	-	RT-qPCR	4	4	-	-	-	-	42 150 µm tandem stenosis group; 15 sham surgery group.	-	-
27128471	Emanueli, C., Shearn, A.I., et al. 2016	Human	Column-based system (Exo-spin Mini-Columns)	Plasma	Stored at -80°C	Nanoparticle tracking analysis	-	-	Patients undergoing Coronary artery bypass graft (CABG)	Plasma-derived exosomes	miR-1	+	-	-	-	< 0,001	-	-	15	-	67.8	-	1	-	-	COPTIC - we have used pre-op and post-op samples (banked at a temperature of between -70°C and -80°C) from a subgroups of male non-diabetic patients (n = 15), aged less than 75 years undergoing coronary artery bypass graft (CABG) surgery using cardiopulmonary bypass (CPB).	-
27128471	Emanueli, C., Shearn, A.I., et al. 2016	Human	Column-based system (Exo-spin Mini-Columns)	Plasma	Stored at -80°C	Nanoparticle tracking analysis, Transmission electron microscopy, Western blotting	-	-	Patients undergoing Coronary artery bypass graft (CABG)	Plasma-derived exosomes	miR-23a	=	-	-	-	0.4468	-	-	6	-	67.5	-	1	-	-	ARCADIA - we used anonymized citrate plasma (for miR and exosome analyses) and serum (for hs-cTn-I) samples from 6 male non-diabetic CABG patients previously stored at -80ºC.	-
27128471	Emanueli, C., Shearn, A.I., et al. 2016	Human	Column-based system (Exo-spin Mini-Columns)	Plasma	Stored at -80°C	Nanoparticle tracking analysis, Transmission electron microscopy, Western blotting	-	-	Patients undergoing Coronary artery bypass graft (CABG)	Plasma-derived exosomes	miR-24	+	-	-	-	0.0049	-	-	-	-	-	-	1	-	-	-	-
27128471	Emanueli, C., Shearn, A.I., et al. 2016	Human	Column-based system (Exo-spin Mini-Columns)	Plasma	Stored at -80°C	Nanoparticle tracking analysis, Transmission electron microscopy, Western blotting	-	-	Patients undergoing Coronary artery bypass graft (CABG)	Plasma-derived exosomes	miR-92a	=	-	-	-	0.159	-	-	-	-	-	-	1	-	-	-	-
27128471	Emanueli, C., Shearn, A.I., et al. 2016	Human	Column-based system (Exo-spin Mini-Columns)	Plasma	Stored at -80°C	Nanoparticle tracking analysis, Transmission electron microscopy, Western blotting	-	-	Patients undergoing Coronary artery bypass graft (CABG)	Plasma-derived exosomes	miR-126	=	-	-	-	0.0601	-	-	-	-	-	-	1	-	-	-	-
27128471	Emanueli, C., Shearn, A.I., et al. 2016	Human	Column-based system (Exo-spin Mini-Columns)	Plasma	Stored at -80°C	Nanoparticle tracking analysis, Transmission electron microscopy, Western blotting	-	-	Patients undergoing Coronary artery bypass graft (CABG)	Plasma-derived exosomes	miR-133a	+	-	-	-	< 0,001	-	-	-	-	-	-	1	-	-	-	-
27128471	Emanueli, C., Shearn, A.I., et al. 2016	Human	Column-based system (Exo-spin Mini-Columns)	Plasma	Stored at -80°C	Nanoparticle tracking analysis, Transmission electron microscopy, Western blotting	-	-	Patients undergoing Coronary artery bypass graft (CABG)	Plasma-derived exosomes	miR-133b	+	-	-	-	0.0372	-	-	-	-	-	-	1	-	-	-	-
27128471	Emanueli, C., Shearn, A.I., et al. 2016	Human	Column-based system (Exo-spin Mini-Columns)	Plasma	Stored at -80°C	Nanoparticle tracking analysis, Transmission electron microscopy, Western blotting	-	-	Patients undergoing Coronary artery bypass graft (CABG)	Plasma-derived exosomes	miR-208a	=	-	-	-	0.1023	-	-	-	-	-	-	1	-	-	-	-
27128471	Emanueli, C., Shearn, A.I., et al. 2016	Human	Column-based system (Exo-spin Mini-Columns)	Plasma	Stored at -80°C	Nanoparticle tracking analysis, Transmission electron microscopy, Western blotting	-	-	Patients undergoing Coronary artery bypass graft (CABG)	Plasma-derived exosomes	miR-208b	=	-	-	-	0.4205	-	-	-	-	-	-	1	-	-	-	-
27128471	Emanueli, C., Shearn, A.I., et al. 2016	Human	Column-based system (Exo-spin Mini-Columns)	Plasma	Stored at -80°C	Nanoparticle tracking analysis, Transmission electron microscopy, Western blotting	-	-	Patients undergoing Coronary artery bypass graft (CABG)	Plasma-derived exosomes	miR-210	+	-	-	-	< 0,001	-	-	-	-	-	-	1	-	-	-	-
27128471	Emanueli, C., Shearn, A.I., et al. 2016	Human	Column-based system (Exo-spin Mini-Columns)	Plasma	Stored at -80°C	Nanoparticle tracking analysis, Transmission electron microscopy, Western blotting	-	-	Patients undergoing Coronary artery bypass graft (CABG)	Plasma-derived exosomes	miR-223	+	-	-	-	< 0,001	-	-	-	-	-	-	1	-	-	-	-
27128471	Emanueli, C., Shearn, A.I., et al. 2016	Human	Column-based system (Exo-spin Mini-Columns)	Plasma	Stored at -80°C	Nanoparticle tracking analysis, Transmission electron microscopy, Western blotting	-	-	Patients undergoing Coronary artery bypass graft (CABG)	Plasma-derived exosomes	miR-451	=	-	-	-	0.853	-	-	-	-	-	-	1	-	-	-	-
27118092	Zhang, L., Wang, W., et al. 2016	Human	ExoQuick Exosome Precipitation Solution	Serum	Stored at -80°C	Transmission electron microscopy, Western blotting	The expression levels of the three specific exosome biomarkers (CD9, CD81, and flotillin) were markedly higher in isolated microvesicles than in serum. Microvesicles separated from serum were confirmed as exosomes.	-	Coronary artery dilatation due to Kawasaki disease (KD)	Serum-derived exosomes	ITIH4	+	-	-	-	-	-	MALDI-TOF/TOF MS	6	6	-	-	-	-	-	-	-
27118092	Zhang, L., Wang, W., et al. 2016	Human	ExoQuick Exosome Precipitation Solution	Serum	Stored at -80°C	Transmission electron microscopy, Western blotting	The expression levels of the three specific exosome biomarkers (CD9, CD81, and flotillin) were markedly higher in isolated microvesicles than in serum. Microvesicles separated from serum were confirmed as exosomes.	-	Coronary artery dilatation due to Kawasaki disease (KD)	Serum-derived exosomes	PROS1	-	-	-	-	-	-	MALDI-TOF/TOF MS	6	6	-	-	-	-	-	-	-
27118092	Zhang, L., Wang, W., et al. 2016	Human	ExoQuick Exosome Precipitation Solution	Serum	Stored at -80°C	Transmission electron microscopy, Western blotting	The expression levels of the three specific exosome biomarkers (CD9, CD81, and flotillin) were markedly higher in isolated microvesicles than in serum. Microvesicles separated from serum were confirmed as exosomes.	-	Coronary artery dilatation due to Kawasaki disease (KD)	Serum-derived exosomes	C9	+	-	-	-	-	-	MALDI-TOF/TOF MS	6	6	-	-	-	-	-	-	-
27118092	Zhang, L., Wang, W., et al. 2016	Human	ExoQuick Exosome Precipitation Solution	Serum	Stored at -80°C	Transmission electron microscopy, Western blotting	The expression levels of the three specific exosome biomarkers (CD9, CD81, and flotillin) were markedly higher in isolated microvesicles than in serum. Microvesicles separated from serum were confirmed as exosomes.	-	Coronary artery dilatation due to Kawasaki disease (KD)	Serum-derived exosomes	AFM	-	-	-	-	-	-	MALDI-TOF/TOF MS	6	6	-	-	-	-	-	-	-
27118092	Zhang, L., Wang, W., et al. 2016	Human	ExoQuick Exosome Precipitation Solution	Serum	Stored at -80°C	Transmission electron microscopy, Western blotting	The expression levels of the three specific exosome biomarkers (CD9, CD81, and flotillin) were markedly higher in isolated microvesicles than in serum. Microvesicles separated from serum were confirmed as exosomes.	-	Coronary artery dilatation due to Kawasaki disease (KD)	Serum-derived exosomes	IGFALS	-	-	-	-	-	-	MALDI-TOF/TOF MS	6	6	-	-	-	-	-	-	-
27118092	Zhang, L., Wang, W., et al. 2016	Human	ExoQuick Exosome Precipitation Solution	Serum	Stored at -80°C	Transmission electron microscopy, Western blotting	The expression levels of the three specific exosome biomarkers (CD9, CD81, and flotillin) were markedly higher in isolated microvesicles than in serum. Microvesicles separated from serum were confirmed as exosomes.	-	Coronary artery dilatation due to Kawasaki disease (KD)	Serum-derived exosomes	C4A	-	-	-	-	-	-	MALDI-TOF/TOF MS	6	6	-	-	-	-	-	-	-
27118092	Zhang, L., Wang, W., et al. 2016	Human	ExoQuick Exosome Precipitation Solution	Serum	Stored at -80°C	Transmission electron microscopy, Western blotting	The expression levels of the three specific exosome biomarkers (CD9, CD81, and flotillin) were markedly higher in isolated microvesicles than in serum. Microvesicles separated from serum were confirmed as exosomes.	-	Coronary artery dilatation due to Kawasaki disease (KD)	Serum-derived exosomes	HPX	-	-	-	-	-	-	MALDI-TOF/TOF MS	6	6	-	-	-	-	-	-	-
27118092	Zhang, L., Wang, W., et al. 2016	Human	ExoQuick Exosome Precipitation Solution	Serum	Stored at -80°C	Transmission electron microscopy, Western blotting	The expression levels of the three specific exosome biomarkers (CD9, CD81, and flotillin) were markedly higher in isolated microvesicles than in serum. Microvesicles separated from serum were confirmed as exosomes.	-	Coronary artery dilatation due to Kawasaki disease (KD)	Serum-derived exosomes	A1BG	-	-	-	-	-	-	MALDI-TOF/TOF MS	6	6	-	-	-	-	-	-	-
27118092	Zhang, L., Wang, W., et al. 2016	Human	ExoQuick Exosome Precipitation Solution	Serum	Stored at -80°C	Transmission electron microscopy, Western blotting	The expression levels of the three specific exosome biomarkers (CD9, CD81, and flotillin) were markedly higher in isolated microvesicles than in serum. Microvesicles separated from serum were confirmed as exosomes.	-	Coronary artery dilatation due to Kawasaki disease (KD)	Serum-derived exosomes	Inter-alpha (globulin) inhibitor H4 (plasma kallikrein-sensitive glycoprotein) variant	+	-	-	-	-	-	MALDI-TOF/TOF MS	6	6	-	-	-	-	-	-	-
27118092	Zhang, L., Wang, W., et al. 2016	Human	ExoQuick Exosome Precipitation Solution	Serum	Stored at -80°C	Transmission electron microscopy, Western blotting	The expression levels of the three specific exosome biomarkers (CD9, CD81, and flotillin) were markedly higher in isolated microvesicles than in serum. Microvesicles separated from serum were confirmed as exosomes.	-	Coronary artery dilatation due to Kawasaki disease (KD)	Serum-derived exosomes	Inter-alpha (globulin) inhibitor H4 (plasma kallikrein-sensitive glycoprotein) variant	+	-	-	-	-	-	MALDI-TOF/TOF MS	6	6	-	-	-	-	-	-	-
27118092	Zhang, L., Wang, W., et al. 2016	Human	ExoQuick Exosome Precipitation Solution	Serum	Stored at -80°C	Transmission electron microscopy, Western blotting	The expression levels of the three specific exosome biomarkers (CD9, CD81, and flotillin) were markedly higher in isolated microvesicles than in serum. Microvesicles separated from serum were confirmed as exosomes.	-	Coronary artery dilatation due to Kawasaki disease (KD)	Serum-derived exosomes	SERPINC 1	-	-	-	-	-	-	MALDI-TOF/TOF MS	6	6	-	-	-	-	-	-	-
27118092	Zhang, L., Wang, W., et al. 2016	Human	ExoQuick Exosome Precipitation Solution	Serum	Stored at -80°C	Transmission electron microscopy, Western blotting	The expression levels of the three specific exosome biomarkers (CD9, CD81, and flotillin) were markedly higher in isolated microvesicles than in serum. Microvesicles separated from serum were confirmed as exosomes.	-	Coronary artery dilatation due to Kawasaki disease (KD)	Serum-derived exosomes	SERPINC 1	-	-	-	-	-	-	MALDI-TOF/TOF MS	6	6	-	-	-	-	-	-	-
27118092	Zhang, L., Wang, W., et al. 2016	Human	ExoQuick Exosome Precipitation Solution	Serum	Stored at -80°C	Transmission electron microscopy, Western blotting	The expression levels of the three specific exosome biomarkers (CD9, CD81, and flotillin) were markedly higher in isolated microvesicles than in serum. Microvesicles separated from serum were confirmed as exosomes.	-	Coronary artery dilatation due to Kawasaki disease (KD)	Serum-derived exosomes	AGT	+	-	-	-	-	-	MALDI-TOF/TOF MS	6	6	-	-	-	-	-	-	-
27118092	Zhang, L., Wang, W., et al. 2016	Human	ExoQuick Exosome Precipitation Solution	Serum	Stored at -80°C	Transmission electron microscopy, Western blotting	The expression levels of the three specific exosome biomarkers (CD9, CD81, and flotillin) were markedly higher in isolated microvesicles than in serum. Microvesicles separated from serum were confirmed as exosomes.	-	Coronary artery dilatation due to Kawasaki disease (KD)	Serum-derived exosomes	GC	-	-	-	-	-	-	MALDI-TOF/TOF MS	6	6	-	-	-	-	-	-	-
27118092	Zhang, L., Wang, W., et al. 2016	Human	ExoQuick Exosome Precipitation Solution	Serum	Stored at -80°C	Transmission electron microscopy, Western blotting	The expression levels of the three specific exosome biomarkers (CD9, CD81, and flotillin) were markedly higher in isolated microvesicles than in serum. Microvesicles separated from serum were confirmed as exosomes.	-	Coronary artery dilatation due to Kawasaki disease (KD)	Serum-derived exosomes	GC	-	-	-	-	-	-	MALDI-TOF/TOF MS	6	6	-	-	-	-	-	-	-
27118092	Zhang, L., Wang, W., et al. 2016	Human	ExoQuick Exosome Precipitation Solution	Serum	Stored at -80°C	Transmission electron microscopy, Western blotting	The expression levels of the three specific exosome biomarkers (CD9, CD81, and flotillin) were markedly higher in isolated microvesicles than in serum. Microvesicles separated from serum were confirmed as exosomes.	-	Coronary artery dilatation due to Kawasaki disease (KD)	Serum-derived exosomes	KNG1	-	-	-	-	-	-	MALDI-TOF/TOF MS	6	6	-	-	-	-	-	-	-
27118092	Zhang, L., Wang, W., et al. 2016	Human	ExoQuick Exosome Precipitation Solution	Serum	Stored at -80°C	Transmission electron microscopy, Western blotting	The expression levels of the three specific exosome biomarkers (CD9, CD81, and flotillin) were markedly higher in isolated microvesicles than in serum. Microvesicles separated from serum were confirmed as exosomes.	-	Coronary artery dilatation due to Kawasaki disease (KD)	Serum-derived exosomes	SERPINA 3	+	-	-	-	-	-	MALDI-TOF/TOF MS	6	6	-	-	-	-	-	-	-
27118092	Zhang, L., Wang, W., et al. 2016	Human	ExoQuick Exosome Precipitation Solution	Serum	Stored at -80°C	Transmission electron microscopy, Western blotting	The expression levels of the three specific exosome biomarkers (CD9, CD81, and flotillin) were markedly higher in isolated microvesicles than in serum. Microvesicles separated from serum were confirmed as exosomes.	-	Coronary artery dilatation due to Kawasaki disease (KD)	Serum-derived exosomes	LRG1	+	-	-	-	-	-	MALDI-TOF/TOF MS	6	6	-	-	-	-	-	-	-
27118092	Zhang, L., Wang, W., et al. 2016	Human	ExoQuick Exosome Precipitation Solution	Serum	Stored at -80°C	Transmission electron microscopy, Western blotting	The expression levels of the three specific exosome biomarkers (CD9, CD81, and flotillin) were markedly higher in isolated microvesicles than in serum. Microvesicles separated from serum were confirmed as exosomes.	-	Coronary artery dilatation due to Kawasaki disease (KD)	Serum-derived exosomes	C4B	+	-	-	-	-	-	MALDI-TOF/TOF MS	6	6	-	-	-	-	-	-	-
27118092	Zhang, L., Wang, W., et al. 2016	Human	ExoQuick Exosome Precipitation Solution	Serum	Stored at -80°C	Transmission electron microscopy, Western blotting	The expression levels of the three specific exosome biomarkers (CD9, CD81, and flotillin) were markedly higher in isolated microvesicles than in serum. Microvesicles separated from serum were confirmed as exosomes.	-	Coronary artery dilatation due to Kawasaki disease (KD)	Serum-derived exosomes	C4B	+	-	-	-	-	-	MALDI-TOF/TOF MS	6	6	-	-	-	-	-	-	-
27118092	Zhang, L., Wang, W., et al. 2016	Human	ExoQuick Exosome Precipitation Solution	Serum	Stored at -80°C	Transmission electron microscopy, Western blotting	The expression levels of the three specific exosome biomarkers (CD9, CD81, and flotillin) were markedly higher in isolated microvesicles than in serum. Microvesicles separated from serum were confirmed as exosomes.	-	Coronary artery dilatation due to Kawasaki disease (KD)	Serum-derived exosomes	C4B	+	-	-	-	-	-	MALDI-TOF/TOF MS	6	6	-	-	-	-	-	-	-
27118092	Zhang, L., Wang, W., et al. 2016	Human	ExoQuick Exosome Precipitation Solution	Serum	Stored at -80°C	Transmission electron microscopy, Western blotting	The expression levels of the three specific exosome biomarkers (CD9, CD81, and flotillin) were markedly higher in isolated microvesicles than in serum. Microvesicles separated from serum were confirmed as exosomes.	-	Coronary artery dilatation due to Kawasaki disease (KD)	Serum-derived exosomes	HP	+	-	-	-	-	-	MALDI-TOF/TOF MS	6	6	-	-	-	-	-	-	-
27118092	Zhang, L., Wang, W., et al. 2016	Human	ExoQuick Exosome Precipitation Solution	Serum	Stored at -80°C	Transmission electron microscopy, Western blotting	The expression levels of the three specific exosome biomarkers (CD9, CD81, and flotillin) were markedly higher in isolated microvesicles than in serum. Microvesicles separated from serum were confirmed as exosomes.	-	Coronary artery dilatation due to Kawasaki disease (KD)	Serum-derived exosomes	CLU	-	-	-	-	-	-	MALDI-TOF/TOF MS	6	6	-	-	-	-	-	-	-
27118092	Zhang, L., Wang, W., et al. 2016	Human	ExoQuick Exosome Precipitation Solution	Serum	Stored at -80°C	Transmission electron microscopy, Western blotting	The expression levels of the three specific exosome biomarkers (CD9, CD81, and flotillin) were markedly higher in isolated microvesicles than in serum. Microvesicles separated from serum were confirmed as exosomes.	-	Coronary artery dilatation due to Kawasaki disease (KD)	Serum-derived exosomes	CLU	-	-	-	-	-	-	MALDI-TOF/TOF MS	6	6	-	-	-	-	-	-	-
27118092	Zhang, L., Wang, W., et al. 2016	Human	ExoQuick Exosome Precipitation Solution	Serum	Stored at -80°C	Transmission electron microscopy, Western blotting	The expression levels of the three specific exosome biomarkers (CD9, CD81, and flotillin) were markedly higher in isolated microvesicles than in serum. Microvesicles separated from serum were confirmed as exosomes.	-	Coronary artery dilatation due to Kawasaki disease (KD)	Serum-derived exosomes	PON3	-	-	-	-	-	-	MALDI-TOF/TOF MS	6	6	-	-	-	-	-	-	-
27118092	Zhang, L., Wang, W., et al. 2016	Human	ExoQuick Exosome Precipitation Solution	Serum	Stored at -80°C	Transmission electron microscopy, Western blotting	The expression levels of the three specific exosome biomarkers (CD9, CD81, and flotillin) were markedly higher in isolated microvesicles than in serum. Microvesicles separated from serum were confirmed as exosomes.	-	Coronary artery dilatation due to Kawasaki disease (KD)	Serum-derived exosomes	C3	-	-	-	-	-	-	MALDI-TOF/TOF MS	6	6	-	-	-	-	-	-	-
27118092	Zhang, L., Wang, W., et al. 2016	Human	ExoQuick Exosome Precipitation Solution	Serum	Stored at -80°C	Transmission electron microscopy, Western blotting	The expression levels of the three specific exosome biomarkers (CD9, CD81, and flotillin) were markedly higher in isolated microvesicles than in serum. Microvesicles separated from serum were confirmed as exosomes.	-	Coronary artery dilatation due to Kawasaki disease (KD)	Serum-derived exosomes	CD5L	-	-	-	-	-	-	MALDI-TOF/TOF MS	6	6	-	-	-	-	-	-	-
27118092	Zhang, L., Wang, W., et al. 2016	Human	ExoQuick Exosome Precipitation Solution	Serum	Stored at -80°C	Transmission electron microscopy, Western blotting	The expression levels of the three specific exosome biomarkers (CD9, CD81, and flotillin) were markedly higher in isolated microvesicles than in serum. Microvesicles separated from serum were confirmed as exosomes.	-	Coronary artery dilatation due to Kawasaki disease (KD)	Serum-derived exosomes	SHBG	-	-	-	-	-	-	MALDI-TOF/TOF MS; Western blotting	6	6	-	-	-	-	-	-	-
27118092	Zhang, L., Wang, W., et al. 2016	Human	ExoQuick Exosome Precipitation Solution	Serum	Stored at -80°C	Transmission electron microscopy, Western blotting	The expression levels of the three specific exosome biomarkers (CD9, CD81, and flotillin) were markedly higher in isolated microvesicles than in serum. Microvesicles separated from serum were confirmed as exosomes.	-	Coronary artery dilatation due to Kawasaki disease (KD)	Serum-derived exosomes	SHBG	-	-	-	-	-	-	MALDI-TOF/TOF MS; Western blotting	6	6	-	-	-	-	-	-	-
27118092	Zhang, L., Wang, W., et al. 2016	Human	ExoQuick Exosome Precipitation Solution	Serum	Stored at -80°C	Transmission electron microscopy, Western blotting	The expression levels of the three specific exosome biomarkers (CD9, CD81, and flotillin) were markedly higher in isolated microvesicles than in serum. Microvesicles separated from serum were confirmed as exosomes.	-	Coronary artery dilatation due to Kawasaki disease (KD)	Serum-derived exosomes	FGG	+	-	-	-	-	-	MALDI-TOF/TOF MS	6	6	-	-	-	-	-	-	-
27118092	Zhang, L., Wang, W., et al. 2016	Human	ExoQuick Exosome Precipitation Solution	Serum	Stored at -80°C	Transmission electron microscopy, Western blotting	The expression levels of the three specific exosome biomarkers (CD9, CD81, and flotillin) were markedly higher in isolated microvesicles than in serum. Microvesicles separated from serum were confirmed as exosomes.	-	Coronary artery dilatation due to Kawasaki disease (KD)	Serum-derived exosomes	APOL1	-	-	-	-	-	-	MALDI-TOF/TOF MS	6	6	-	-	-	-	-	-	-
27118092	Zhang, L., Wang, W., et al. 2016	Human	ExoQuick Exosome Precipitation Solution	Serum	Stored at -80°C	Transmission electron microscopy, Western blotting	The expression levels of the three specific exosome biomarkers (CD9, CD81, and flotillin) were markedly higher in isolated microvesicles than in serum. Microvesicles separated from serum were confirmed as exosomes.	-	Coronary artery dilatation due to Kawasaki disease (KD)	Serum-derived exosomes	CFHR1	+	-	-	-	-	-	MALDI-TOF/TOF MS	6	6	-	-	-	-	-	-	-
27118092	Zhang, L., Wang, W., et al. 2016	Human	ExoQuick Exosome Precipitation Solution	Serum	Stored at -80°C	Transmission electron microscopy, Western blotting	The expression levels of the three specific exosome biomarkers (CD9, CD81, and flotillin) were markedly higher in isolated microvesicles than in serum. Microvesicles separated from serum were confirmed as exosomes.	-	Coronary artery dilatation due to Kawasaki disease (KD)	Serum-derived exosomes	CFHR1	+	-	-	-	-	-	MALDI-TOF/TOF MS	6	6	-	-	-	-	-	-	-
27118092	Zhang, L., Wang, W., et al. 2016	Human	ExoQuick Exosome Precipitation Solution	Serum	Stored at -80°C	Transmission electron microscopy, Western blotting	The expression levels of the three specific exosome biomarkers (CD9, CD81, and flotillin) were markedly higher in isolated microvesicles than in serum. Microvesicles separated from serum were confirmed as exosomes.	-	Coronary artery dilatation due to Kawasaki disease (KD)	Serum-derived exosomes	FGB	+	-	-	-	-	-	MALDI-TOF/TOF MS	6	6	-	-	-	-	-	-	-
27118092	Zhang, L., Wang, W., et al. 2016	Human	ExoQuick Exosome Precipitation Solution	Serum	Stored at -80°C	Transmission electron microscopy, Western blotting	The expression levels of the three specific exosome biomarkers (CD9, CD81, and flotillin) were markedly higher in isolated microvesicles than in serum. Microvesicles separated from serum were confirmed as exosomes.	-	Coronary artery dilatation due to Kawasaki disease (KD)	Serum-derived exosomes	TF	-	-	-	-	-	-	MALDI-TOF/TOF MS; Western blotting	6	6	-	-	-	-	-	-	-
27118092	Zhang, L., Wang, W., et al. 2016	Human	ExoQuick Exosome Precipitation Solution	Serum	Stored at -80°C	Transmission electron microscopy, Western blotting	The expression levels of the three specific exosome biomarkers (CD9, CD81, and flotillin) were markedly higher in isolated microvesicles than in serum. Microvesicles separated from serum were confirmed as exosomes.	-	Coronary artery dilatation due to Kawasaki disease (KD)	Serum-derived exosomes	ALB	-	-	-	-	-	-	MALDI-TOF/TOF MS	6	6	-	-	-	-	-	-	-
27118092	Zhang, L., Wang, W., et al. 2016	Human	ExoQuick Exosome Precipitation Solution	Serum	Stored at -80°C	Transmission electron microscopy, Western blotting	The expression levels of the three specific exosome biomarkers (CD9, CD81, and flotillin) were markedly higher in isolated microvesicles than in serum. Microvesicles separated from serum were confirmed as exosomes.	-	Coronary artery dilatation due to Kawasaki disease (KD)	Serum-derived exosomes	ALB - albumin, isoform CRA_k	-	-	-	-	-	-	MALDI-TOF/TOF MS	6	6	-	-	-	-	-	-	-
27118092	Zhang, L., Wang, W., et al. 2016	Human	ExoQuick Exosome Precipitation Solution	Serum	Stored at -80°C	Transmission electron microscopy, Western blotting	The expression levels of the three specific exosome biomarkers (CD9, CD81, and flotillin) were markedly higher in isolated microvesicles than in serum. Microvesicles separated from serum were confirmed as exosomes.	-	Coronary artery dilatation due to Kawasaki disease (KD)	Serum-derived exosomes	CFI	-	-	-	-	-	-	MALDI-TOF/TOF MS	6	6	-	-	-	-	-	-	-
27118092	Zhang, L., Wang, W., et al. 2016	Human	ExoQuick Exosome Precipitation Solution	Serum	Stored at -80°C	Transmission electron microscopy, Western blotting	The expression levels of the three specific exosome biomarkers (CD9, CD81, and flotillin) were markedly higher in isolated microvesicles than in serum. Microvesicles separated from serum were confirmed as exosomes.	-	Coronary artery dilatation due to Kawasaki disease (KD)	Serum-derived exosomes	IGHM	-	-	-	-	-	-	MALDI-TOF/TOF MS	6	6	-	-	-	-	-	-	-
27118092	Zhang, L., Wang, W., et al. 2016	Human	ExoQuick Exosome Precipitation Solution	Serum	Stored at -80°C	Transmission electron microscopy, Western blotting	The expression levels of the three specific exosome biomarkers (CD9, CD81, and flotillin) were markedly higher in isolated microvesicles than in serum. Microvesicles separated from serum were confirmed as exosomes.	-	Coronary artery dilatation due to Kawasaki disease (KD)	Serum-derived exosomes	Ig kappa chain V-IV region Len	+	-	-	-	-	-	MALDI-TOF/TOF MS	6	6	-	-	-	-	-	-	-
27118092	Zhang, L., Wang, W., et al. 2016	Human	ExoQuick Exosome Precipitation Solution	Serum	Stored at -80°C	Transmission electron microscopy, Western blotting	The expression levels of the three specific exosome biomarkers (CD9, CD81, and flotillin) were markedly higher in isolated microvesicles than in serum. Microvesicles separated from serum were confirmed as exosomes.	-	Coronary artery dilatation due to Kawasaki disease (KD)	Serum-derived exosomes	MBL2	-	-	-	-	-	-	MALDI-TOF/TOF MS	6	6	-	-	-	-	-	-	-
27118092	Zhang, L., Wang, W., et al. 2016	Human	ExoQuick Exosome Precipitation Solution	Serum	Stored at -80°C	Transmission electron microscopy, Western blotting	The expression levels of the three specific exosome biomarkers (CD9, CD81, and flotillin) were markedly higher in isolated microvesicles than in serum. Microvesicles separated from serum were confirmed as exosomes.	-	Coronary artery dilatation due to Kawasaki disease (KD)	Serum-derived exosomes	TTR	-	-	-	-	-	-	MALDI-TOF/TOF MS	6	6	-	-	-	-	-	-	-
27118092	Zhang, L., Wang, W., et al. 2016	Human	ExoQuick Exosome Precipitation Solution	Serum	Stored at -80°C	Transmission electron microscopy, Western blotting	The expression levels of the three specific exosome biomarkers (CD9, CD81, and flotillin) were markedly higher in isolated microvesicles than in serum. Microvesicles separated from serum were confirmed as exosomes.	-	Coronary artery dilatation due to Kawasaki disease (KD)	Serum-derived exosomes	SERPINA 1	-	-	-	-	-	-	MALDI-TOF/TOF MS	6	6	-	-	-	-	-	-	-
27118092	Zhang, L., Wang, W., et al. 2016	Human	ExoQuick Exosome Precipitation Solution	Serum	Stored at -80°C	Transmission electron microscopy, Western blotting	The expression levels of the three specific exosome biomarkers (CD9, CD81, and flotillin) were markedly higher in isolated microvesicles than in serum. Microvesicles separated from serum were confirmed as exosomes.	-	Coronary artery dilatation due to Kawasaki disease (KD)	Serum-derived exosomes	IGKC	+	-	-	-	-	-	MALDI-TOF/TOF MS	6	6	-	-	-	-	-	-	-
27118092	Zhang, L., Wang, W., et al. 2016	Human	ExoQuick Exosome Precipitation Solution	Serum	Stored at -80°C	Transmission electron microscopy, Western blotting	The expression levels of the three specific exosome biomarkers (CD9, CD81, and flotillin) were markedly higher in isolated microvesicles than in serum. Microvesicles separated from serum were confirmed as exosomes.	-	Coronary artery dilatation due to Kawasaki disease (KD)	Serum-derived exosomes	APOM	-	-	-	-	-	-	MALDI-TOF/TOF MS	6	6	-	-	-	-	-	-	-
27118092	Zhang, L., Wang, W., et al. 2016	Human	ExoQuick Exosome Precipitation Solution	Serum	Stored at -80°C	Transmission electron microscopy, Western blotting	The expression levels of the three specific exosome biomarkers (CD9, CD81, and flotillin) were markedly higher in isolated microvesicles than in serum. Microvesicles separated from serum were confirmed as exosomes.	-	Coronary artery dilatation due to Kawasaki disease (KD)	Serum-derived exosomes	CLEC3B	-	-	-	-	-	-	MALDI-TOF/TOF MS	6	6	-	-	-	-	-	-	-
27118092	Zhang, L., Wang, W., et al. 2016	Human	ExoQuick Exosome Precipitation Solution	Serum	Stored at -80°C	Transmission electron microscopy, Western blotting	The expression levels of the three specific exosome biomarkers (CD9, CD81, and flotillin) were markedly higher in isolated microvesicles than in serum. Microvesicles separated from serum were confirmed as exosomes.	-	Coronary artery dilatation due to Kawasaki disease (KD)	Serum-derived exosomes	HP	+	-	-	-	-	-	MALDI-TOF/TOF MS	6	6	-	-	-	-	-	-	-
27118092	Zhang, L., Wang, W., et al. 2016	Human	ExoQuick Exosome Precipitation Solution	Serum	Stored at -80°C	Transmission electron microscopy, Western blotting	The expression levels of the three specific exosome biomarkers (CD9, CD81, and flotillin) were markedly higher in isolated microvesicles than in serum. Microvesicles separated from serum were confirmed as exosomes.	-	Coronary artery dilatation due to Kawasaki disease (KD)	Serum-derived exosomes	HP	+	-	-	-	-	-	MALDI-TOF/TOF MS	6	6	-	-	-	-	-	-	-
27118092	Zhang, L., Wang, W., et al. 2016	Human	ExoQuick Exosome Precipitation Solution	Serum	Stored at -80°C	Transmission electron microscopy, Western blotting	The expression levels of the three specific exosome biomarkers (CD9, CD81, and flotillin) were markedly higher in isolated microvesicles than in serum. Microvesicles separated from serum were confirmed as exosomes.	-	Coronary artery dilatation due to Kawasaki disease (KD)	Serum-derived exosomes	HP	+	-	-	-	-	-	MALDI-TOF/TOF MS	6	6	-	-	-	-	-	-	-
27118092	Zhang, L., Wang, W., et al. 2016	Human	ExoQuick Exosome Precipitation Solution	Serum	Stored at -80°C	Transmission electron microscopy, Western blotting	The expression levels of the three specific exosome biomarkers (CD9, CD81, and flotillin) were markedly higher in isolated microvesicles than in serum. Microvesicles separated from serum were confirmed as exosomes.	-	Coronary artery dilatation due to Kawasaki disease (KD)	Serum-derived exosomes	HP	+	-	-	-	-	-	MALDI-TOF/TOF MS	6	6	-	-	-	-	-	-	-
27118092	Zhang, L., Wang, W., et al. 2016	Human	ExoQuick Exosome Precipitation Solution	Serum	Stored at -80°C	Transmission electron microscopy, Western blotting	The expression levels of the three specific exosome biomarkers (CD9, CD81, and flotillin) were markedly higher in isolated microvesicles than in serum. Microvesicles separated from serum were confirmed as exosomes.	-	Coronary artery dilatation due to Kawasaki disease (KD)	Serum-derived exosomes	TTR	-	-	-	-	-	-	MALDI-TOF/TOF MS	6	6	-	-	-	-	-	-	-
27118092	Zhang, L., Wang, W., et al. 2016	Human	ExoQuick Exosome Precipitation Solution	Serum	Stored at -80°C	Transmission electron microscopy, Western blotting	The expression levels of the three specific exosome biomarkers (CD9, CD81, and flotillin) were markedly higher in isolated microvesicles than in serum. Microvesicles separated from serum were confirmed as exosomes.	-	Coronary artery dilatation due to Kawasaki disease (KD)	Serum-derived exosomes	LRG1	+	-	-	-	-	-	MALDI-TOF/TOF MS; Western blotting	6	6	-	-	-	-	-	-	-
26980205	Aliotta, J.M., Pereira, M., et al. 2016	Human	Ultracentrifugation	Plasma	-	Nanoparticle tracking analysis, Transmission electron microscopy, Western blotting	-	-	Idiopathic pulmonary arterial hypertension (IPAH)	Plasma-derived exosomes	miR-let-7c	+	-	-	-	-	-	miRNA Microarray	-	4	-	-	-	-	Human subjects were enrolled at the Pulmonary Hypertension Center of Rhode Island Hospital at the time of right heart catheterization which was performed for known or suspected PAH.	-	-
26980205	Aliotta, J.M., Pereira, M., et al. 2016	Human	Ultracentrifugation	Plasma	-	Nanoparticle tracking analysis, Transmission electron microscopy, Western blotting	-	-	Idiopathic pulmonary arterial hypertension (IPAH)	Plasma-derived exosomes	miR-let-7d	+	-	-	-	-	-	miRNA Microarray	-	4	-	-	-	-	Human subjects were enrolled at the Pulmonary Hypertension Center of Rhode Island Hospital at the time of right heart catheterization which was performed for known or suspected PAH.	-	-
26980205	Aliotta, J.M., Pereira, M., et al. 2016	Human	Ultracentrifugation	Plasma	-	Nanoparticle tracking analysis, Transmission electron microscopy, Western blotting	-	-	Idiopathic pulmonary arterial hypertension (IPAH)	Plasma-derived exosomes	miR-16	+	-	-	-	-	-	miRNA Microarray	-	4	-	-	-	-	Human subjects were enrolled at the Pulmonary Hypertension Center of Rhode Island Hospital at the time of right heart catheterization which was performed for known or suspected PAH.	-	-
26980205	Aliotta, J.M., Pereira, M., et al. 2016	Human	Ultracentrifugation	Plasma	-	Nanoparticle tracking analysis, Transmission electron microscopy, Western blotting	-	-	Idiopathic pulmonary arterial hypertension (IPAH)	Plasma-derived exosomes	miR-18a	+	-	-	-	-	-	miRNA Microarray	-	4	-	-	-	-	Human subjects were enrolled at the Pulmonary Hypertension Center of Rhode Island Hospital at the time of right heart catheterization which was performed for known or suspected PAH.	-	-
26980205	Aliotta, J.M., Pereira, M., et al. 2016	Human	Ultracentrifugation	Plasma	-	Nanoparticle tracking analysis, Transmission electron microscopy, Western blotting	-	-	Idiopathic pulmonary arterial hypertension (IPAH)	Plasma-derived exosomes	miR-19b	+	-	-	-	-	-	miRNA Microarray	-	4	-	-	-	-	Human subjects were enrolled at the Pulmonary Hypertension Center of Rhode Island Hospital at the time of right heart catheterization which was performed for known or suspected PAH.	-	-
26980205	Aliotta, J.M., Pereira, M., et al. 2016	Human	Ultracentrifugation	Plasma	-	Nanoparticle tracking analysis, Transmission electron microscopy, Western blotting	-	-	Idiopathic pulmonary arterial hypertension (IPAH)	Plasma-derived exosomes	miR-20a	+	-	-	-	-	-	miRNA Microarray	-	4	-	-	-	-	Human subjects were enrolled at the Pulmonary Hypertension Center of Rhode Island Hospital at the time of right heart catheterization which was performed for known or suspected PAH.	-	-
26980205	Aliotta, J.M., Pereira, M., et al. 2016	Human	Ultracentrifugation	Plasma	-	Nanoparticle tracking analysis, Transmission electron microscopy, Western blotting	-	-	Idiopathic pulmonary arterial hypertension (IPAH)	Plasma-derived exosomes	miR-20b	+	-	-	-	-	-	miRNA Microarray	-	4	-	-	-	-	Human subjects were enrolled at the Pulmonary Hypertension Center of Rhode Island Hospital at the time of right heart catheterization which was performed for known or suspected PAH.	-	-
26980205	Aliotta, J.M., Pereira, M., et al. 2016	Human	Ultracentrifugation	Plasma	-	Nanoparticle tracking analysis, Transmission electron microscopy, Western blotting	-	-	Idiopathic pulmonary arterial hypertension (IPAH)	Plasma-derived exosomes	miR-27b	+	-	-	-	-	-	miRNA Microarray	-	4	-	-	-	-	Human subjects were enrolled at the Pulmonary Hypertension Center of Rhode Island Hospital at the time of right heart catheterization which was performed for known or suspected PAH.	-	-
26980205	Aliotta, J.M., Pereira, M., et al. 2016	Human	Ultracentrifugation	Plasma	-	Nanoparticle tracking analysis, Transmission electron microscopy, Western blotting	-	-	Idiopathic pulmonary arterial hypertension (IPAH)	Plasma-derived exosomes	miR-30b	+	-	-	-	-	-	miRNA Microarray	-	4	-	-	-	-	Human subjects were enrolled at the Pulmonary Hypertension Center of Rhode Island Hospital at the time of right heart catheterization which was performed for known or suspected PAH.	-	-
26980205	Aliotta, J.M., Pereira, M., et al. 2016	Human	Ultracentrifugation	Plasma	-	Nanoparticle tracking analysis, Transmission electron microscopy, Western blotting	-	-	Idiopathic pulmonary arterial hypertension (IPAH)	Plasma-derived exosomes	miR-30c	+	-	-	-	-	-	miRNA Microarray	-	4	-	-	-	-	Human subjects were enrolled at the Pulmonary Hypertension Center of Rhode Island Hospital at the time of right heart catheterization which was performed for known or suspected PAH.	-	-
26980205	Aliotta, J.M., Pereira, M., et al. 2016	Human	Ultracentrifugation	Plasma	-	Nanoparticle tracking analysis, Transmission electron microscopy, Western blotting	-	-	Idiopathic pulmonary arterial hypertension (IPAH)	Plasma-derived exosomes	miR-125a-5p	+	-	-	-	-	-	miRNA Microarray	-	4	-	-	-	-	Human subjects were enrolled at the Pulmonary Hypertension Center of Rhode Island Hospital at the time of right heart catheterization which was performed for known or suspected PAH.	-	-
26980205	Aliotta, J.M., Pereira, M., et al. 2016	Human	Ultracentrifugation	Plasma	-	Nanoparticle tracking analysis, Transmission electron microscopy, Western blotting	-	-	Idiopathic pulmonary arterial hypertension (IPAH)	Plasma-derived exosomes	miR-145	+	-	-	-	-	-	miRNA Microarray	-	4	-	-	-	-	Human subjects were enrolled at the Pulmonary Hypertension Center of Rhode Island Hospital at the time of right heart catheterization which was performed for known or suspected PAH.	-	-
26980205	Aliotta, J.M., Pereira, M., et al. 2016	Human	Ultracentrifugation	Plasma	-	Nanoparticle tracking analysis, Transmission electron microscopy, Western blotting	-	-	Idiopathic pulmonary arterial hypertension (IPAH)	Plasma-derived exosomes	miR-146b	+	-	-	-	-	-	miRNA Microarray	-	4	-	-	-	-	Human subjects were enrolled at the Pulmonary Hypertension Center of Rhode Island Hospital at the time of right heart catheterization which was performed for known or suspected PAH.	-	-
26980205	Aliotta, J.M., Pereira, M., et al. 2016	Human	Ultracentrifugation	Plasma	-	Nanoparticle tracking analysis, Transmission electron microscopy, Western blotting	-	-	Idiopathic pulmonary arterial hypertension (IPAH)	Plasma-derived exosomes	miR-148a	+	-	-	-	-	-	miRNA Microarray	-	4	-	-	-	-	Human subjects were enrolled at the Pulmonary Hypertension Center of Rhode Island Hospital at the time of right heart catheterization which was performed for known or suspected PAH.	-	-
26980205	Aliotta, J.M., Pereira, M., et al. 2016	Human	Ultracentrifugation	Plasma	-	Nanoparticle tracking analysis, Transmission electron microscopy, Western blotting	-	-	Idiopathic pulmonary arterial hypertension (IPAH)	Plasma-derived exosomes	miR-195	+	-	-	-	-	-	miRNA Microarray	-	4	-	-	-	-	Human subjects were enrolled at the Pulmonary Hypertension Center of Rhode Island Hospital at the time of right heart catheterization which was performed for known or suspected PAH.	-	-
26980205	Aliotta, J.M., Pereira, M., et al. 2016	Human	Ultracentrifugation	Plasma	-	Nanoparticle tracking analysis, Transmission electron microscopy, Western blotting	-	-	Idiopathic pulmonary arterial hypertension (IPAH)	Plasma-derived exosomes	miR-200b	+	-	-	-	-	-	miRNA Microarray	-	4	-	-	-	-	Human subjects were enrolled at the Pulmonary Hypertension Center of Rhode Island Hospital at the time of right heart catheterization which was performed for known or suspected PAH.	-	-
26980205	Aliotta, J.M., Pereira, M., et al. 2016	Human	Ultracentrifugation	Plasma	-	Nanoparticle tracking analysis, Transmission electron microscopy, Western blotting	-	-	Idiopathic pulmonary arterial hypertension (IPAH)	Plasma-derived exosomes	miR-215	+	-	-	-	-	-	miRNA Microarray	-	4	-	-	-	-	Human subjects were enrolled at the Pulmonary Hypertension Center of Rhode Island Hospital at the time of right heart catheterization which was performed for known or suspected PAH.	-	-
26980205	Aliotta, J.M., Pereira, M., et al. 2016	Human	Ultracentrifugation	Plasma	-	Nanoparticle tracking analysis, Transmission electron microscopy, Western blotting	-	-	Idiopathic pulmonary arterial hypertension (IPAH)	Plasma-derived exosomes	miR-218	+	-	-	-	-	-	miRNA Microarray	-	4	-	-	-	-	Human subjects were enrolled at the Pulmonary Hypertension Center of Rhode Island Hospital at the time of right heart catheterization which was performed for known or suspected PAH.	-	-
26980205	Aliotta, J.M., Pereira, M., et al. 2016	Human	Ultracentrifugation	Plasma	-	Nanoparticle tracking analysis, Transmission electron microscopy, Western blotting	-	-	Idiopathic pulmonary arterial hypertension (IPAH)	Plasma-derived exosomes	miR-221	+	-	-	-	-	-	miRNA Microarray	-	4	-	-	-	-	Human subjects were enrolled at the Pulmonary Hypertension Center of Rhode Island Hospital at the time of right heart catheterization which was performed for known or suspected PAH.	-	-
26980205	Aliotta, J.M., Pereira, M., et al. 2016	Human	Ultracentrifugation	Plasma	-	Nanoparticle tracking analysis, Transmission electron microscopy, Western blotting	-	-	Idiopathic pulmonary arterial hypertension (IPAH)	Plasma-derived exosomes	miR-339-3p	+	-	-	-	-	-	miRNA Microarray	-	4	-	-	-	-	Human subjects were enrolled at the Pulmonary Hypertension Center of Rhode Island Hospital at the time of right heart catheterization which was performed for known or suspected PAH.	-	-
26980205	Aliotta, J.M., Pereira, M., et al. 2016	Human	Ultracentrifugation	Plasma	-	Nanoparticle tracking analysis, Transmission electron microscopy, Western blotting	-	-	Idiopathic pulmonary arterial hypertension (IPAH)	Plasma-derived exosomes	miR-365	+	-	-	-	-	-	miRNA Microarray	-	4	-	-	-	-	Human subjects were enrolled at the Pulmonary Hypertension Center of Rhode Island Hospital at the time of right heart catheterization which was performed for known or suspected PAH.	-	-
26953322	Ivy, J.R., Oosthuyzen, W., et al. 2016	Mice	-	Urine	-	Nanoparticle tracking analysis, Western blotting	-	-	Hypertension	Urine-derived exosomes	NCC	+	-	-	-	< 0,01	Paired t test	-	-	-	2 - 4 months	-	-	-	C57BL6J/Ola mice; NCC is higher when mice are awake	-	-
26857375	Yan, Y., Li, Y., et al. 2016	Human	ExoQuick Exosome Precipitation Solution	Serum	-	Transmission electron microscopy, flow cytometry, immunoblotting	CD63 expression in exosomes from serum of patients with UA and AMI by immunoblotting (n = 10 for each group).	Briefly, serum was filtered using a 0.22-μm pore filter before precipitation. The cell-free serum was mixed well with ExoQuick exosome precipitation solution. After the mixture was incubated at 4 °C for 30 min and centrifuged at 4 °C at 1500×g for 30 min, the obtained pellet was re-suspended nuclease free water.	Acute myocardial infarction (AMI)	Serum-derived exosomes	miR-30a	+	-	-	5,86 ± 1,43	< 0,01	-	RT-PCR	26	24	59 ± 11 (SD)	59 ± 13 (SD)	0.692308	0.583333	-	The diagnosis of acute myocardial infarction (AMI) was based on the following criteria: (1) persistent symptoms of myocardial ischemia, (2) electrocardiogram change indicative of AMI (pathological Q wave, ST-segment elevation or depression), and (3) plasma cTnI >0.1 ng/ml.	-
26857375	Yan, Y., Li, Y., et al. 2016	Human	ExoQuick Exosome Precipitation Solution	Serum	-	Transmission electron microscopy, flow cytometry, immunoblotting	CD63 expression in exosomes from serum of patients with UA and AMI by immunoblotting (n = 10 for each group).	Briefly, serum was filtered using a 0.22-μm pore filter before precipitation. The cell-free serum was mixed well with ExoQuick exosome precipitation solution. After the mixture was incubated at 4 °C for 30 min and centrifuged at 4 °C at 1500×g for 30 min, the obtained pellet was re-suspended nuclease free water.	Acute myocardial infarction (AMI)	Serum-derived exosomes	miR-30a	+	-	-	4,17 ± 1,24	< 0,01	-	RT-PCR	28	24	57 ± 9 (SD)	59 ± 13 (SD)	0.571429	0.583333	-	The diagnosis of acute myocardial infarction (AMI) was based on the following criteria: (1) persistent symptoms of myocardial ischemia, (2) electrocardiogram change indicative of AMI (pathological Q wave, ST-segment elevation or depression), and (3) plasma cTnI >0.1 ng/ml.	-
26857375	Yan, Y., Li, Y., et al. 2016	Human	ExoQuick Exosome Precipitation Solution	Serum	-	Transmission electron microscopy, flow cytometry, immunoblotting	CD63 expression in exosomes from serum of patients with UA and AMI by immunoblotting (n = 10 for each group).	Briefly, serum was filtered using a 0.22-μm pore filter before precipitation. The cell-free serum was mixed well with ExoQuick exosome precipitation solution. After the mixture was incubated at 4 °C for 30 min and centrifuged at 4 °C at 1500×g for 30 min, the obtained pellet was re-suspended nuclease free water.	Acute myocardial infarction (AMI)	Serum-derived exosomes	miR-30a	=	-	-	-	-	-	RT-PCR	25	24	59 ± 17 (SD)	59 ± 13 (SD)	0.6	0.583333	-	The diagnosis of acute myocardial infarction (AMI) was based on the following criteria: (1) persistent symptoms of myocardial ischemia, (2) electrocardiogram change indicative of AMI (pathological Q wave, ST-segment elevation or depression), and (3) plasma cTnI >0.1 ng/ml.	-
26857375	Yan, Y., Li, Y., et al. 2016	Human	ExoQuick Exosome Precipitation Solution	Serum	-	Transmission electron microscopy, flow cytometry, immunoblotting	CD63 expression in exosomes from serum of patients with UA and AMI by immunoblotting (n = 10 for each group).	Briefly, serum was filtered using a 0.22-μm pore filter before precipitation. The cell-free serum was mixed well with ExoQuick exosome precipitation solution. After the mixture was incubated at 4 °C for 30 min and centrifuged at 4 °C at 1500×g for 30 min, the obtained pellet was re-suspended nuclease free water.	Acute myocardial infarction (AMI)	Serum-derived exosomes	miR-30a	=	-	-	-	-	-	RT-PCR	22	24	60 ± 13 (SD)	59 ± 13 (SD)	0.590909	0.583333	-	The diagnosis of acute myocardial infarction (AMI) was based on the following criteria: (1) persistent symptoms of myocardial ischemia, (2) electrocardiogram change indicative of AMI (pathological Q wave, ST-segment elevation or depression), and (3) plasma cTnI >0.1 ng/ml.	-
26159041	Foglio, E., Puddighinu, G., et al. 2015	Human	Ultracentrifugation	Plasma	Stored at -80°C	Western blotting	Expression of Rab 5B and CD81, two housekeepingmarkers of exosomes	Plasma and PFs from control patients and patients with acute MI were centrifuged at 1200 ×g for 20 min followed by 10,000 ×g for 30 min. Supernatants were double filtered using first a 0.45 and then a 0.22 μmPVDF-filter (Millipore Corp., Bedford, MA) (necessary to exclude both microvesicles and vesicles exceeding 220 nm) and centrifuged at 100,000 ×g for 1 h in a Beckman ultracentrifuge (Beckman …	Acute myocardial infarction (AMI)	Plasma-derived exosomes	-	-	-	-	-	-	-	-	12	12	-	-	-	-	-	12 patients with acute myocardial infarction (MI) undergoing CABG within 5–10 days from the onset of the acute coronary syndrome (MI group).12 patients undergoing surgery either for aortic root aneurysm or valvular disease (control group). All patients in this group had no angiographic evidence of coronary artery disease.	-
26159041	Foglio, E., Puddighinu, G., et al. 2015	Human	Ultracentrifugation	Pericardial fluid (PF)	Stored at -80°C	Western blotting	Expression of Rab 5B and CD81, two housekeepingmarkers of exosomes	Plasma and PFs from control patients and patients with acute MI were centrifuged at 1200 ×g for 20 min followed by 10,000 ×g for 30 min. Supernatants were double filtered using first a 0.45 and then a 0.22 μmPVDF-filter (Millipore Corp., Bedford, MA) (necessary to exclude both microvesicles and vesicles exceeding 220 nm) and centrifuged at 100,000 ×g for 1 h in a Beckman ultracentrifuge (Beckman …	Acute myocardial infarction (AMI)	Pericardial fluid (PF)-derived exosomes	-	-	-	-	-	-	-	-	12	12	-	-	-	-	-	-	-
25763857	Kuosmanen, S.M., Hartikainen, J., et al. 2015	Human	-	Pericardial fluid (PF)	-	-	-	-	Heart failure (HF)	Pericardial fluid (PF)-derived exosomes	miR-210	-	-	-	-	-	-	qPCR	51	-	63,8 ± 9,3 (SD)	-	0.73	-	-	-	-
25763857	Kuosmanen, S.M., Hartikainen, J., et al. 2015	Human	-	Pericardial fluid (PF)	-	-	-	-	Heart failure (HF)	Pericardial fluid (PF)-derived exosomes	let-7b-3p	-	-	-	-	-	-	qPCR	51	-	63,8 ± 9,3 (SD)	-	0.73	-	-	-	-
25763857	Kuosmanen, S.M., Hartikainen, J., et al. 2015	Human	-	Pericardial fluid (PF)	-	-	-	-	Heart failure (HF)	Pericardial fluid (PF)-derived exosomes	let-7d-3p	-	-	-	-	-	-	qPCR	51	-	63,8 ± 9,3 (SD)	-	0.73	-	-	-	-
25763857	Kuosmanen, S.M., Hartikainen, J., et al. 2015	Human	-	Pericardial fluid (PF)	-	-	-	-	Heart failure (HF)	Pericardial fluid (PF)-derived exosomes	miR-1	-	-	-	-	-	-	qPCR	51	-	63,8 ± 9,3 (SD)	-	0.73	-	-	-	-
25763857	Kuosmanen, S.M., Hartikainen, J., et al. 2015	Human	-	Pericardial fluid (PF)	-	-	-	-	Heart failure (HF)	Pericardial fluid (PF)-derived exosomes	miR-125a-5p	-	-	-	-	-	-	qPCR	51	-	63,8 ± 9,3 (SD)	-	0.73	-	-	-	-
25763857	Kuosmanen, S.M., Hartikainen, J., et al. 2015	Human	-	Pericardial fluid (PF)	-	-	-	-	Heart failure (HF)	Pericardial fluid (PF)-derived exosomes	miR-126-3p	-	-	-	-	-	-	qPCR	51	-	63,8 ± 9,3 (SD)	-	0.73	-	-	-	-
25763857	Kuosmanen, S.M., Hartikainen, J., et al. 2015	Human	-	Pericardial fluid (PF)	-	-	-	-	Heart failure (HF)	Pericardial fluid (PF)-derived exosomes	miR-129-5p	-	-	-	-	-	-	qPCR	51	-	63,8 ± 9,3 (SD)	-	0.73	-	-	-	-
25763857	Kuosmanen, S.M., Hartikainen, J., et al. 2015	Human	-	Pericardial fluid (PF)	-	-	-	-	Heart failure (HF)	Pericardial fluid (PF)-derived exosomes	miR-132-3p	-	-	-	-	-	-	qPCR	51	-	63,8 ± 9,3 (SD)	-	0.73	-	-	-	-
25763857	Kuosmanen, S.M., Hartikainen, J., et al. 2015	Human	-	Pericardial fluid (PF)	-	-	-	-	Heart failure (HF)	Pericardial fluid (PF)-derived exosomes	miR-133a	-	-	-	-	-	-	qPCR	51	-	63,8 ± 9,3 (SD)	-	0.73	-	-	-	-
25763857	Kuosmanen, S.M., Hartikainen, J., et al. 2015	Human	-	Pericardial fluid (PF)	-	-	-	-	Heart failure (HF)	Pericardial fluid (PF)-derived exosomes	miR-135a-5p	-	-	-	-	-	-	qPCR	51	-	63,8 ± 9,3 (SD)	-	0.73	-	-	-	-
25763857	Kuosmanen, S.M., Hartikainen, J., et al. 2015	Human	-	Pericardial fluid (PF)	-	-	-	-	Heart failure (HF)	Pericardial fluid (PF)-derived exosomes	miR-135b-5p	-	-	-	-	-	-	qPCR	51	-	63,8 ± 9,3 (SD)	-	0.73	-	-	-	-
25763857	Kuosmanen, S.M., Hartikainen, J., et al. 2015	Human	-	Pericardial fluid (PF)	-	-	-	-	Heart failure (HF)	Pericardial fluid (PF)-derived exosomes	miR-138-5p	-	-	-	-	-	-	qPCR	51	-	63,8 ± 9,3 (SD)	-	0.73	-	-	-	-
25763857	Kuosmanen, S.M., Hartikainen, J., et al. 2015	Human	-	Pericardial fluid (PF)	-	-	-	-	Heart failure (HF)	Pericardial fluid (PF)-derived exosomes	miR-139-5p	-	-	-	-	-	-	qPCR	51	-	63,8 ± 9,3 (SD)	-	0.73	-	-	-	-
25763857	Kuosmanen, S.M., Hartikainen, J., et al. 2015	Human	-	Pericardial fluid (PF)	-	-	-	-	Heart failure (HF)	Pericardial fluid (PF)-derived exosomes	miR-140-5p	-	-	-	-	-	-	qPCR	51	-	63,8 ± 9,3 (SD)	-	0.73	-	-	-	-
25763857	Kuosmanen, S.M., Hartikainen, J., et al. 2015	Human	-	Pericardial fluid (PF)	-	-	-	-	Heart failure (HF)	Pericardial fluid (PF)-derived exosomes	miR-143-3p	-	-	-	-	-	-	qPCR	51	-	63,8 ± 9,3 (SD)	-	0.73	-	-	-	-
25763857	Kuosmanen, S.M., Hartikainen, J., et al. 2015	Human	-	Pericardial fluid (PF)	-	-	-	-	Heart failure (HF)	Pericardial fluid (PF)-derived exosomes	miR-145-5p	-	-	-	-	-	-	qPCR	51	-	63,8 ± 9,3 (SD)	-	0.73	-	-	-	-
25763857	Kuosmanen, S.M., Hartikainen, J., et al. 2015	Human	-	Pericardial fluid (PF)	-	-	-	-	Heart failure (HF)	Pericardial fluid (PF)-derived exosomes	miR-146a-3p	-	-	-	-	-	-	qPCR	51	-	63,8 ± 9,3 (SD)	-	0.73	-	-	-	-
25763857	Kuosmanen, S.M., Hartikainen, J., et al. 2015	Human	-	Pericardial fluid (PF)	-	-	-	-	Heart failure (HF)	Pericardial fluid (PF)-derived exosomes	miR-146a-5p	-	-	-	-	-	-	qPCR	51	-	63,8 ± 9,3 (SD)	-	0.73	-	-	-	-
25763857	Kuosmanen, S.M., Hartikainen, J., et al. 2015	Human	-	Pericardial fluid (PF)	-	-	-	-	Heart failure (HF)	Pericardial fluid (PF)-derived exosomes	miR-17-5p	-	-	-	-	-	-	qPCR	51	-	63,8 ± 9,3 (SD)	-	0.73	-	-	-	-
25763857	Kuosmanen, S.M., Hartikainen, J., et al. 2015	Human	-	Pericardial fluid (PF)	-	-	-	-	Heart failure (HF)	Pericardial fluid (PF)-derived exosomes	miR-181a-5p	-	-	-	-	-	-	qPCR	51	-	63,8 ± 9,3 (SD)	-	0.73	-	-	-	-
25763857	Kuosmanen, S.M., Hartikainen, J., et al. 2015	Human	-	Pericardial fluid (PF)	-	-	-	-	Heart failure (HF)	Pericardial fluid (PF)-derived exosomes	miR-181b-5p	-	-	-	-	-	-	qPCR	51	-	63,8 ± 9,3 (SD)	-	0.73	-	-	-	-
25763857	Kuosmanen, S.M., Hartikainen, J., et al. 2015	Human	-	Pericardial fluid (PF)	-	-	-	-	Heart failure (HF)	Pericardial fluid (PF)-derived exosomes	miR-181c-5p	-	-	-	-	-	-	qPCR	51	-	63,8 ± 9,3 (SD)	-	0.73	-	-	-	-
25763857	Kuosmanen, S.M., Hartikainen, J., et al. 2015	Human	-	Pericardial fluid (PF)	-	-	-	-	Heart failure (HF)	Pericardial fluid (PF)-derived exosomes	miR-208a	-	-	-	-	-	-	qPCR	51	-	63,8 ± 9,3 (SD)	-	0.73	-	-	-	-
25763857	Kuosmanen, S.M., Hartikainen, J., et al. 2015	Human	-	Pericardial fluid (PF)	-	-	-	-	Heart failure (HF)	Pericardial fluid (PF)-derived exosomes	miR-20a-5p	-	-	-	-	-	-	qPCR	51	-	63,8 ± 9,3 (SD)	-	0.73	-	-	-	-
25763857	Kuosmanen, S.M., Hartikainen, J., et al. 2015	Human	-	Pericardial fluid (PF)	-	-	-	-	Heart failure (HF)	Pericardial fluid (PF)-derived exosomes	miR-21-3p	-	-	-	-	-	-	qPCR	51	-	63,8 ± 9,3 (SD)	-	0.73	-	-	-	-
25763857	Kuosmanen, S.M., Hartikainen, J., et al. 2015	Human	-	Pericardial fluid (PF)	-	-	-	-	Heart failure (HF)	Pericardial fluid (PF)-derived exosomes	miR-214-3p	-	-	-	-	-	-	qPCR	51	-	63,8 ± 9,3 (SD)	-	0.73	-	-	-	-
25763857	Kuosmanen, S.M., Hartikainen, J., et al. 2015	Human	-	Pericardial fluid (PF)	-	-	-	-	Heart failure (HF)	Pericardial fluid (PF)-derived exosomes	miR-23a-3p	-	-	-	-	-	-	qPCR	51	-	63,8 ± 9,3 (SD)	-	0.73	-	-	-	-
25763857	Kuosmanen, S.M., Hartikainen, J., et al. 2015	Human	-	Pericardial fluid (PF)	-	-	-	-	Heart failure (HF)	Pericardial fluid (PF)-derived exosomes	miR-23b-3p	-	-	-	-	-	-	qPCR	51	-	63,8 ± 9,3 (SD)	-	0.73	-	-	-	-
25763857	Kuosmanen, S.M., Hartikainen, J., et al. 2015	Human	-	Pericardial fluid (PF)	-	-	-	-	Heart failure (HF)	Pericardial fluid (PF)-derived exosomes	miR-25-3p	-	-	-	-	-	-	qPCR	51	-	63,8 ± 9,3 (SD)	-	0.73	-	-	-	-
25763857	Kuosmanen, S.M., Hartikainen, J., et al. 2015	Human	-	Pericardial fluid (PF)	-	-	-	-	Heart failure (HF)	Pericardial fluid (PF)-derived exosomes	miR-30a-3p	-	-	-	-	-	-	qPCR	51	-	63,8 ± 9,3 (SD)	-	0.73	-	-	-	-
25763857	Kuosmanen, S.M., Hartikainen, J., et al. 2015	Human	-	Pericardial fluid (PF)	-	-	-	-	Heart failure (HF)	Pericardial fluid (PF)-derived exosomes	miR-30c-5p	-	-	-	-	-	-	qPCR	51	-	63,8 ± 9,3 (SD)	-	0.73	-	-	-	-
25763857	Kuosmanen, S.M., Hartikainen, J., et al. 2015	Human	-	Pericardial fluid (PF)	-	-	-	-	Heart failure (HF)	Pericardial fluid (PF)-derived exosomes	miR-30e-3p	-	-	-	-	-	-	qPCR	51	-	63,8 ± 9,3 (SD)	-	0.73	-	-	-	-
25763857	Kuosmanen, S.M., Hartikainen, J., et al. 2015	Human	-	Pericardial fluid (PF)	-	-	-	-	Heart failure (HF)	Pericardial fluid (PF)-derived exosomes	miR-320a	-	-	-	-	-	-	qPCR	51	-	63,8 ± 9,3 (SD)	-	0.73	-	-	-	-
25763857	Kuosmanen, S.M., Hartikainen, J., et al. 2015	Human	-	Pericardial fluid (PF)	-	-	-	-	Heart failure (HF)	Pericardial fluid (PF)-derived exosomes	miR-330-5p	-	-	-	-	-	-	qPCR	51	-	63,8 ± 9,3 (SD)	-	0.73	-	-	-	-
25763857	Kuosmanen, S.M., Hartikainen, J., et al. 2015	Human	-	Pericardial fluid (PF)	-	-	-	-	Heart failure (HF)	Pericardial fluid (PF)-derived exosomes	miR-339-3p	-	-	-	-	-	-	qPCR	51	-	63,8 ± 9,3 (SD)	-	0.73	-	-	-	-
25763857	Kuosmanen, S.M., Hartikainen, J., et al. 2015	Human	-	Pericardial fluid (PF)	-	-	-	-	Heart failure (HF)	Pericardial fluid (PF)-derived exosomes	miR-346	-	-	-	-	-	-	qPCR	51	-	63,8 ± 9,3 (SD)	-	0.73	-	-	-	-
25763857	Kuosmanen, S.M., Hartikainen, J., et al. 2015	Human	-	Pericardial fluid (PF)	-	-	-	-	Heart failure (HF)	Pericardial fluid (PF)-derived exosomes	miR-34c-3p	-	-	-	-	-	-	qPCR	51	-	63,8 ± 9,3 (SD)	-	0.73	-	-	-	-
25763857	Kuosmanen, S.M., Hartikainen, J., et al. 2015	Human	-	Pericardial fluid (PF)	-	-	-	-	Heart failure (HF)	Pericardial fluid (PF)-derived exosomes	miR-365a-3p	-	-	-	-	-	-	qPCR	51	-	63,8 ± 9,3 (SD)	-	0.73	-	-	-	-
25763857	Kuosmanen, S.M., Hartikainen, J., et al. 2015	Human	-	Pericardial fluid (PF)	-	-	-	-	Heart failure (HF)	Pericardial fluid (PF)-derived exosomes	miR-375	-	-	-	-	-	-	qPCR	51	-	63,8 ± 9,3 (SD)	-	0.73	-	-	-	-
25763857	Kuosmanen, S.M., Hartikainen, J., et al. 2015	Human	-	Pericardial fluid (PF)	-	-	-	-	Heart failure (HF)	Pericardial fluid (PF)-derived exosomes	miR-499a-5p	-	-	-	-	-	-	qPCR	51	-	63,8 ± 9,3 (SD)	-	0.73	-	-	-	-
25763857	Kuosmanen, S.M., Hartikainen, J., et al. 2015	Human	-	Pericardial fluid (PF)	-	-	-	-	Heart failure (HF)	Pericardial fluid (PF)-derived exosomes	miR-505-3p	-	-	-	-	-	-	qPCR	51	-	63,8 ± 9,3 (SD)	-	0.73	-	-	-	-
25763857	Kuosmanen, S.M., Hartikainen, J., et al. 2015	Human	-	Pericardial fluid (PF)	-	-	-	-	Heart failure (HF)	Pericardial fluid (PF)-derived exosomes	miR-532-3p	-	-	-	-	-	-	qPCR	51	-	63,8 ± 9,3 (SD)	-	0.73	-	-	-	-
25763857	Kuosmanen, S.M., Hartikainen, J., et al. 2015	Human	-	Pericardial fluid (PF)	-	-	-	-	Heart failure (HF)	Pericardial fluid (PF)-derived exosomes	miR-671-5p	-	-	-	-	-	-	qPCR	51	-	63,8 ± 9,3 (SD)	-	0.73	-	-	-	-
25763857	Kuosmanen, S.M., Hartikainen, J., et al. 2015	Human	-	Pericardial fluid (PF)	-	-	-	-	Heart failure (HF)	Pericardial fluid (PF)-derived exosomes	miR-92b-3p	-	-	-	-	-	-	qPCR	51	-	63,8 ± 9,3 (SD)	-	0.73	-	-	-	-
25763857	Kuosmanen, S.M., Hartikainen, J., et al. 2015	Human	-	Pericardial fluid (PF)	-	-	-	-	Heart failure (HF)	Pericardial fluid (PF)-derived exosomes	miR-9-3p	-	-	-	-	-	-	qPCR	51	-	63,8 ± 9,3 (SD)	-	0.73	-	-	-	-
[truncated: 52 more rows]

## Sheet: Target genes EXO-based miRNAs
Table S3 - Top 10 target genes of exosome-based miRNAs, when available, using TarBase v.8 software from DIANA tools (http://carolina.imis.athena-innovation.gr/diana_tools/web/index.php?r=tarbasev8%2Findex). Acessed on 18/01/2021.
Cardiovascular disease, risk factor or complication	Biofluid	Human/Mice/Rats	miRNA	Target genes
Coronary artery disease (CAD)	Plasma	Mice	mmu-miR-1	-
Coronary artery disease (CAD)	Plasma	Mice	mmu-miR-208a	-
Coronary artery disease (CAD)	Plasma	Mice	mmu-miR-133a	-
Coronary artery disease (CAD)	Plasma	Mice	mmu-miR-499-5p	Smad5
Coronary artery disease (CAD)	Plasma	Mice	mmu-miR-499-5p	Map3k2
Coronary artery disease (CAD)	Plasma	Mice	mmu-miR-499-5p	Nin
[truncated: 990 more rows]

## Sheet: EXO-based miRNAs
Table S4 - Exosome-based miRNAs variation in plasma and serum samples of coronary artery disease patients. These miRNAs were enrolled in the FunRich analysis to evaluate if they are included or not included in the Vesiclepedia.
[truncated: 11 more rows]

[truncated: 3 more sheets: Vesicle miRNAs (06.07.2020), EXO-based proteins, Vesicle proteins (07.07.2020)]
